# Supplementary material for: The contribution of stress to the comorbidity of migraine and major depression: results from a prospective cohort study
Source: PubMed Central journal article supplement — BMJ Open. 2013 Mar 9;3(3):e002057. doi: 10.1136/bmjopen-2012-002057 (PMC3612807; doi:10.1136/bmjopen-2012-002057), 2013-03-09
Supplement: bmjopen-2012-002057.draft_revisions.pdf [file bmjopen-2012-002057.draft_revisions.pdf]

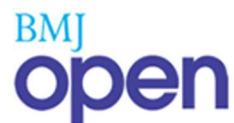

## Assessing the Contribution of Stress to the Comorbidity of Migraine and Major Depression

|                                 |                                                                                                                                                                                                                         |
|---------------------------------|-------------------------------------------------------------------------------------------------------------------------------------------------------------------------------------------------------------------------|
| Journal:                        | <i>BMJ Open</i>                                                                                                                                                                                                         |
| Manuscript ID:                  | bmjopen-2012-002057                                                                                                                                                                                                     |
| Article Type:                   | Research                                                                                                                                                                                                                |
| Date Submitted by the Author:   | 03-Sep-2012                                                                                                                                                                                                             |
| Complete List of Authors:       | Swanson, Sonja; Harvard University, Harvard School of Public Health<br>Zeng, Yiye; University of Alberta, School of Public Health<br>Colman, Ian; University of Ottawa, Department of Epidemiology & Community Medicine |
| <b>Primary Subject Heading</b>: | Mental health                                                                                                                                                                                                           |
| Secondary Subject Heading:      | Epidemiology, Neurology                                                                                                                                                                                                 |
| Keywords:                       | Migraine < NEUROLOGY, Depression & mood disorders < PSYCHIATRY, EPIDEMIOLOGY                                                                                                                                            |
|                                 |                                                                                                                                                                                                                         |

SCHOLARONE™  
Manuscripts

Peer Review Only

Number of References: 40

Abstract Word Count: 195/300

Main Text Word Count: 2,465

Tables: 3

## Assessing the Contribution of Stress to the Comorbidity of Migraine and Major Depression

Sonja A. Swanson<sup>1</sup>, Yiye Zeng<sup>2</sup>, Ian Colman<sup>2,3</sup>

<sup>1</sup> Department of Epidemiology, Harvard School of Public Health, Boston, MA, USA

<sup>2</sup> School of Public Health, University of Alberta, Edmonton, AB, Canada

<sup>3</sup> Department of Epidemiology and Community Medicine, University of Ottawa, Ottawa, ON, Canada

Corresponding Author: Dr. Ian Colman, Assistant Professor, Department of Epidemiology and Community Medicine, University of Ottawa, 451 Smyth Road, Room 3230C, Ottawa, ON, K1H 8M5, CANADA

Email: [icolman@uottawa.ca](mailto:icolman@uottawa.ca) Tel: +1 613 562 5800 ext. 8715

Keywords: migraine, major depression, stress, trauma

## Abstract

**Objectives:** To estimate the comorbidity of migraine and major depression, and to assess how much this association may be explained by various measures of stress, including prior and current forms of acute and chronic stressors.

**Design:** National Population Health Survey is a prospective cohort study representative of the Canadian population followed from 1994/95, with surveys completed every two years through 2008/09.

**Setting:** Canadian adult population ages 18-64

**Participants:** 9,054 participants ages 18-64 years

**Outcome:** Incident migraine and major depression

**Results:** Adjusting for sex and age, depression was predictive of incident migraine (HR: 1.62; 95% CI: 1.03-2.53) and migraine was predictive of incident depression (HR: 1.55; 95% CI: 1.15-2.08). However, adjusting for each stressor we operationalized (childhood trauma, recent marital problems, recent unemployment, recent household financial problems, work stress, chronic stress, and change in social support) decreased this association, with chronic stress being a particularly strong covariate. After further adjusting for all stressors, both effects were largely attenuated and no longer significant (depression-migraine HR: 1.30; 95% CI: 0.80-2.10; migraine-depression HR: 1.19; 95% CI: 0.86-1.66).

**Conclusions:** While there appears to be temporal bidirectionality in the migraine-depression comorbidity, much of the apparent association is explained by stress.

## ARTICLE SUMMARY

### Article Focus

- To understand how much and what kinds of stressors play a role in explaining the comorbidity seen between migraine and major depression

### Key Messages

- Migraine headache and major depression each predict the other prospectively
- Stress, particularly chronic stress, appears to explain much of the association seen between migraine and major depression

### Strengths and Limitations

- Large, representative, prospective cohort study
- Migraine was self-reported with only a single question

## INTRODUCTION

Several studies support that migraine and psychopathologies, in particular major depression, often co-occur.<sup>[1-15]</sup> A recent meta-analysis suggests the odds ratio may be near 2.2 for major depression and migraine.<sup>[16]</sup> While a correlation has been well established, the mechanisms for this occurrence are less clear. Given the breadth of studies finding this correlation, the comorbidity is likely explained by one or more of three paths: (1) a causal path from migraine to depression; (2) a causal path from depression to migraine; and/or (3) some shared common factor(s) cause both depression and migraine.

To begin assessing whether the presence of one disorder may lead to the development of the other, order of onset must be established, as temporality is necessary to establish causality. Prospective studies that examine both directions simultaneously are limited. Breslau and colleagues<sup>[7, 13]</sup> looked at the association between multiple headache types, including migraine, and major depression in a representative sample of middle-age adults. The authors found the association to be bidirectional, with migraine status predicting subsequent depression onset and vice versa. However, follow-up was only over a two-year period with just two assessments (baseline and two years later), limiting the understanding of this potential bidirectional association. Modgill and colleagues<sup>[15]</sup> have previously looked at migraine and major depression with twelve years of follow-up; they also found bidirectionality in their analyses. Other studies that have focused on specific patient samples and/or only a single direction of incidence find that anxiety onset precedes migraine onset, which may in turn precede major depression onset.<sup>[17-19]</sup>

1  
2  
3 However, the timeline between migraine and major depression is less clear in these  
4  
5 studies, particularly because only one direction of onset was examined.  
6  
7

8  
9         Meanwhile, shared risk factors are likely to explain some of the association  
10  
11 between migraine and major depression.<sup>[20]</sup> Much attention has focused on a potentially  
12  
13 shared genetic component,<sup>[21]</sup> although the comorbidity does not appear entirely  
14  
15 explained by a genetic effect. Other research on shared common factors has focused on  
16  
17 more structural or functional neurobiological differences that likely contribute to both  
18  
19 disorders. One environmental factor that deserves further exploration is stress, which has  
20  
21 known associations to major depression<sup>[22, 23]</sup> and migraine<sup>[15]</sup> in both chronic and acute  
22  
23 forms. In the analyses presented by Modgill and colleagues,<sup>[15]</sup> some of the comorbidity  
24  
25 appeared explained by childhood trauma and other stress, particularly for depression  
26  
27 predicting migraine onset. However, their analyses only looked at a limited number of  
28  
29 stressors and did not attempt to address specifically how much different types of stressors  
30  
31 may contribute to this association.  
32  
33  
34  
35  
36

37  
38         The purposes of the current study are as follows: (1) to estimate the comorbidity  
39  
40 of migraine and major depression in the adult Canadian population over an eight-year  
41  
42 prospective follow-up period; and (2) to assess how much this association may be  
43  
44 explained by various measures of stress, including prior and current forms of acute and  
45  
46 chronic stressors.  
47  
48  
49  
50  
51  
52  
53  
54  
55  
56  
57  
58  
59  
60

## METHODS

### *Sample*

The National Population Health Survey (NPHS) is a prospective, nationally-representative study conducted by Statistics Canada that has followed a Canadian cohort since 1994/95. At study inception, individuals were randomly selected using a stratified two-stage sample design (n=17,276). The sample has been contacted every two years, with the most recent data collection in 2008/09. The response rate in the initial cycle of interview (1994/95) was 83.6%, with 63.6% of the original cohort still participating in 2006/07.<sup>[24, 25]</sup> Our research sample is restricted to the 9,054 individuals aged 18 to 64 years in Cycle 4 (2000/01; see Statistical Analyses for further explanation).

### *Depression*

Major depressive episodes are assessed using the Composite International Diagnostic Interview Short Form for Major Depression (CIDI-SFMD) at all eight cycles. The CIDI-SFMD inquires about symptoms of major depression, as defined by the Diagnostic and Statistical Manual of Mental Disorders IV (DSM-IV), during the preceding 12 months. Kessler and colleagues<sup>[26]</sup> showed that the CIDI-SF has 93% classification accuracy for major depressive episode when compared with the full-length CIDI. Individuals who endorse five or more symptoms during a single two-week period are considered to have a 90% probability of having major depression,<sup>[26]</sup> for the purposes of this study, such individuals will be considered as having major depression in that year.

### *Migraine*

Migraine is assessed in a single diagnostic question at each assessment. In the first three assessments (1994/95; 1996/97; 1998/99), subjects were asked whether they currently were having migraine headaches that had been diagnosed by a health professional. In the subsequent five assessments (2000/01; 2002/03; 2004/05; 2006/07; 2008/09), subjects were asked whether they currently have migraine headaches. In these last five assessments, subjects were further asked about the timing of onset of the diagnosis.

### *Stressors*

Using similar definitions as previous studies using NPHS data,<sup>[23]</sup> we defined several types of stressors: childhood trauma, recent marital problems, recent unemployment, recent household financial problems, work stress, chronic stress, and change in social support. Childhood trauma was assessed in Cycle 1 (1994/95) for those 18 or older at that time, and in Cycle 4 (2000/01) for the rest of our cohort. Subjects were asked about seven items of childhood trauma occurring prior to the individual turning 18: parental divorce, a lengthy hospital stay, prolonged parental unemployment, frequent parental alcohol or drug use and physical abuse. Childhood trauma was categorized as none, one event, and two or more events. Three recent stressful life changes were defined: marital problems, recent unemployment, and household financial problems. Marital problems were defined by a change from reporting single, married, or partnered in Cycle 3 (1998/99) to divorced, widowed, or separated in Cycle 4 (2000/01). Recent unemployment was defined as being employed in Cycle 3 (1998/99) but reporting unemployment or not being in the labor force in Cycle 4 (2000/01). Household financial



1  
2  
3  
4  
5  
6  
7  
8  
9  
10  
11  
12  
13  
14  
15  
16  
17  
18  
19  
20  
21  
22  
23  
24  
25  
26  
27  
28  
29  
30  
31  
32  
33  
34  
35  
36  
37  
38  
39  
40  
41  
42  
43  
44  
45  
46  
47  
48  
49  
50  
51  
52  
53  
54  
55  
56  
57  
58  
59  
60

problems were defined as having a score above Statistic Canada's low income cut-off (LICO) in Cycle 3 (1998/99) followed by a score below the cut-off in Cycle 4 (2000/01). The LICO score takes into account the individual's income relative to the community in which an individual lives and the size of their household.<sup>[24,27]</sup> Work stress was measured in Cycle 4 (2000/01) by 13 questions that assessed job security, autonomy, conflict and satisfaction;<sup>[24]</sup> the score was categorized by quartiles. Chronic stress was measured in Cycle 4 (2000/01) by 18 questions that assessed stress in one's personal life, focusing primarily on relationships and family strife;<sup>[24]</sup> this score was also broken into quartiles. Social support was measured by a 4-question scale in Cycle 4 (2000/01);<sup>[24]</sup> this score was dichotomized at the median.

### *Statistical Analyses*

For the purposes of this study, Cycle 4 (2000/01) is considered "baseline" in the presented analyses. This serves two purposes: (1) as both migraine and depression assessments reflect current states rather than diagnostic histories, this allows us to use the first three assessments to construct a several-year history of each disorder prior to baseline; and (2) as many of the stressors were not assessed until this time, this allows a more complete analysis of the role of stressors in the migraine-depression comorbidity.

We examined the onset of incident cases of a second condition relative to an index condition (among those with no history of the second condition). Cox Proportional Hazards Models were fit, and hazards ratios (HR) and their 95% confidence intervals (CI) are presented. Models are presented as unadjusted; adjusting for sex and age; adjusting for sex, age, and each stress exposure individually; and adjusting for sex, age, and all stress exposures. Data analyses were completed using SAS 9.2 and SUDAAN 10.0.1. All

1  
2  
3  
4  
5  
6  
7  
8  
9  
10  
11  
12  
13  
14  
15  
16  
17  
18  
19  
20  
21  
22  
23  
24  
25  
26  
27  
28  
29  
30  
31  
32  
33  
34  
35  
36  
37  
38  
39  
40  
41  
42  
43  
44  
45  
46  
47  
48  
49  
50  
51  
52  
53  
54  
55  
56  
57  
58  
59  
60

estimates were weighted to adjust for unequal selection probabilities and cluster sampling; weights further adjust for attrition between the first and fourth cycle. Standard errors were calculated using the bootstrap method.

For peer review only

## RESULTS

Demographic information is presented in **Table 1**. At baseline, 4.13, 9.13, and 1.33% of the sample reported current depression only, migraine only, and comorbid depression and migraine, respectively.

Models for depression status predicting incident migraine are presented in **Table 2**. Among non-migraineurs in Cycle 4 (2000/01), 5.52% developed migraine during the eight-year follow-up. The sex- and age-adjusted model suggested depression was predictive of incident migraine (HR: 1.62; 95% CI: 1.03-2.53). When adjusting further for stressors in separate models, estimates were further attenuated; adjusting for chronic stress attenuated the estimate the most (HR: 1.34; 95% CI: 0.84-2.13). When adjusting for all forms of stressors simultaneously, the depression-migraine estimate was attenuated by 19.75% (HR: 1.30; 95% CI: 0.80-2.10).

Models for migraine status predicting incident depression are presented in **Table 3**. Among subjects who had not had a depression up through Cycle 4 (2000/01), 8.72% developed incident depression. Migraine status was predictive of incident depression in the age- and sex-adjusted model (HR: 1.55; 95% CI: 1.15-2.08). Adjusting for stressors in separate models attenuated this relationship, with adjustment for chronic stress affecting the estimate the most (HR: 1.33; 95% CI: 0.98-1.79). The fully adjusted model estimate was attenuated by 23.23%, estimating a migraine-depression HR of 1.19 (95% CI: 0.86-1.66).

## DISCUSSION

These results suggest there is an association between major depression and migraine. Without considering common causes or other explanations, these results align with earlier findings supporting a bidirectionality to this association: in crude analyses, migraine status predicted incident depression, and depression status predicted incident migraine. However, both directions of this relationship are largely explained by stressors that likely increase risk for both migraine and depression: adjusting for all measured forms of stress in these surveys attenuated the each estimate by about 20% and the associations were no longer significant after adjustment. Implications for research as well as clinical and public health practice are discussed.

Importantly, all stressors studied here did attenuate the results, suggesting that any form of stress may be an important common cause to consider when studying migraine and depression. This finding follows from prior research that supports both acute and chronic forms of stress as being confounders, since these have been shown to predict depression and migraine.<sup>[15, 22, 23]</sup> The present study suggests that ignoring these stressors collectively would have overestimated the migraine-depression association adjusted for known risk factors, and possibly concluded results were significant when they were not. Thus, research that does not account for these common causes when studying depression and migraine may be presenting misleading estimates.

While all types of stressors did attenuate the results, the strongest risk factor in both sets of models was chronic stress. This fits into a broader context of research suggesting that chronic stress may be causative of various types of chronic pain and major depression. In disentangling the relationship between depression, chronic stress,

1  
2  
3 and chronic pain such as fibromyalgia, its been proposed that chronic stress may lead to  
4  
5 dysfunction in the hypothalamic-pituitary-adrenal axis, which in turn could lead to both  
6  
7 depression and some forms of chronic pain.<sup>[28]</sup> Research specific to stress and migraine  
8  
9 supports this biological theory.<sup>[29]</sup> Notably, childhood trauma was a strong risk factor in  
10  
11 migraine predicting depression; as many of the types of trauma assessed were chronic in  
12  
13 nature, this aligns with the finding that perhaps chronic forms of stress are especially  
14  
15 potent common causes of migraine and depression.  
16  
17  
18  
19

20  
21 Although certainly some of the crude association between depression and  
22  
23 migraine may still be explained by genetics, other common causes, and/or biological  
24  
25 pathways between the two disorders, the current findings suggest interesting  
26  
27 considerations when developing future intervention strategies. Given the possibility of a  
28  
29 biological mechanism between these two disorders, much research attention has been  
30  
31 focused on the efficacy of antidepressant medications on preventing and managing  
32  
33 migraine, with mixed success.<sup>[20, 30, 31]</sup> However, the current study suggests that perhaps a  
34  
35 primary strategy could target reducing stress, particularly chronic stress, as this may both  
36  
37 reduce the burden of the index disorder as well as potentially prevent the second  
38  
39 condition from occurring. Indeed, there have been studies showing that various  
40  
41 behavioural or stress management therapies (e.g., Cognitive-Behavioral Therapy) are  
42  
43 effective treatments for migraine, supporting one aspect of this hypothesis.<sup>[32-34]</sup> Given  
44  
45 how much chronic stress and other stressors seem to explain the comorbidity, such a  
46  
47 strategy may have the potential for reducing this comorbidity burden on a larger scale  
48  
49 than some of these other postulated pharmacological strategies, although further research  
50  
51 actually comparing such treatment strategies would be needed.  
52  
53  
54  
55  
56  
57  
58  
59  
60

1  
2  
3  
4  
5  
6  
7  
8  
9  
10  
11  
12  
13  
14  
15  
16  
17  
18  
19  
20  
21  
22  
23  
24  
25  
26  
27  
28  
29  
30  
31  
32  
33  
34  
35  
36  
37  
38  
39  
40  
41  
42  
43  
44  
45  
46  
47  
48  
49  
50  
51  
52  
53  
54  
55  
56  
57  
58  
59  
60

The study has numerous strengths. This is one of only a few studies to prospectively assess the migraine-depression comorbidity bidirectionally,<sup>[7, 13, 15]</sup> and extends these previous findings by examining whether a rich assortment of well-validated stress measures explained the associations found. The nationally-representative nature of the study aids the generalizability of these findings, and the sample size and length of follow-up are exceptional. However, certain limitations warrant consideration. Migraine was assessed as only a single, self-reported question at each cycle. Ideally, a full battery of symptom-level diagnostic questions would have been available along with doctor diagnosis; however, the prevalence of migraine found in the NPHS is similar to that found in other Canadian studies.<sup>[14, 22]</sup> Nonetheless, self-report may be further inflated in depressed individuals, which may contribute to some overestimation in our associations. While the measure of major depression (CIDI-SFMD) has demonstrated psychometric properties,<sup>[26, 35]</sup> the 12-month diagnosis hinders inference about history of major depression, possible episodes unmeasured in the gap years of the study, and actual age of onset of the disorder. By using an interim cycle as “baseline”, we were able to construct over a half decade profile of subjects’ “history” of major depression to diminish the first issue. Finally, these analyses represent a rich assortment of stressors, but due to study design we were not able to fully address the time-varying nature of the relationships between stress and these episodic conditions. Given that we found acute, chronic, and prior (i.e., childhood trauma) stress to be relevant in this comorbidity, future research may wish to more closely examine the time-varying relationship between stress and these two conditions individually and comorbidly.

1  
2  
3  
4  
5  
6  
7  
8  
9  
10  
11  
12  
13  
14  
15  
16  
17  
18  
19  
20  
21  
22  
23  
24  
25  
26  
27  
28  
29  
30  
31  
32  
33  
34  
35  
36  
37  
38  
39  
40  
41  
42  
43  
44  
45  
46  
47  
48  
49  
50  
51  
52  
53  
54  
55  
56  
57  
58  
59  
60

Understanding the causal mechanisms underlying the migraine-depression comorbidity may have a major public health impact. Major depression is a chief cause of disability worldwide,<sup>[36]</sup> estimated by the World Health Organization to become the second leading cause of disease burden by the year 2020.<sup>[37]</sup> Meanwhile, migraine affects 11% of the adult population, and when combined with other headache disorders also makes it into the top ten causes of disability by World Health Organization estimates.<sup>[38]</sup> Moreover, studies suggest that the disability and burden of these disorders may be compounded when present together.<sup>[11]</sup> Severity appears affected, as frequency and duration of migraine attacks have a significant association with psychiatric comorbidity.<sup>[39]</sup> Migraine patients with a mental health disorder report generally lower quality of life than other migraine patients;<sup>[2]</sup> in parallel, depression patients who report migraine also report poorer quality of life compared to other depression patients.<sup>[40]</sup> As such, implementation of effective stress-management strategies for migraineurs and those suffering from depression (as well as similar strategies to prevent the index disorder onset) may have major implications for prevention and intervention strategies that may lower the societal costs and burdens of both disorders.

## REFERENCES

1. Ratcliffe GE, Enns MW, Jacobi F, Belik SL, Sareen J. The relationship between migraine and mental disorders in a population-based sample. *Gen Hosp Psychiatry*. 2009 Jan-Feb;31(1):14-9.
2. Lipton RB, Hamelsky SW, Kolodner KB, Steiner TJ, Stewart WF. Migraine, quality of life, and depression: a population-based case-control study. *Neurology*. 2000 Sep 12;55(5):629-35.
3. Wang SJ, Liu HC, Fuh JL, Liu CY, Wang PN, Lu SR. Comorbidity of headaches and depression in the elderly. *Pain*. 1999 Sep;82(3):239-43.
4. McWilliams LA, Goodwin RD, Cox BJ. Depression and anxiety associated with three pain conditions: results from a nationally representative sample. *Pain*. 2004 Sep;111(1-2):77-83.
5. Kececi H, Dener S, Analan E. Co-morbidity of migraine and major depression in the Turkish population. *Cephalalgia*. 2003 May;23(4):271-5.
6. Lanteri-Minet M, Valade D, Geraud G, Chautard MH, Lucas C. Migraine and probable migraine--results of FRAMIG 3, a French nationwide survey carried out according to the 2004 IHS classification. *Cephalalgia*. 2005 Dec;25(12):1146-58.
7. Breslau N, Lipton RB, Stewart WF, Schultz LR, Welch KM. Comorbidity of migraine and depression: investigating potential etiology and prognosis. *Neurology*. 2003 Apr 22;60(8):1308-12.
8. Samaan Z, Farmer A, Craddock N, Jones L, Korszun A, Owen M, et al. Migraine in recurrent depression: case-control study. *Br J Psychiatry*. 2009 Apr;194(4):350-4.
9. Camarda C, Pipia C, Tagliavori A, Di Fiore P, Camarda R, Monastero R. Comorbidity between depressive symptoms and migraine: preliminary data from the Zabut Aging Project. *Neurol Sci*. 2008 May;29 Suppl 1:S149-51.
10. Hung CI, Liu CY, Cheng YT, Wang SJ. Migraine: a missing link between somatic symptoms and major depressive disorder. *J Affect Disord*. 2009 Sep;117(1-2):108-15.
11. Jette N, Patten S, Williams J, Becker W, Wiebe S. Comorbidity of migraine and psychiatric disorders--a national population-based study. *Headache*. 2008 Apr;48(4):501-16.
12. Rhee H. Prevalence and predictors of headaches in US adolescents. *Headache*. 2000 Jul-Aug;40(7):528-38.
13. Breslau N, Schultz LR, Stewart WF, Lipton RB, Lucia VC, Welch KM. Headache and major depression: is the association specific to migraine? *Neurology*. 2000 Jan 25;54(2):308-13.
14. Molgat CV, Patten SB. Comorbidity of major depression and migraine--a Canadian population-based study. *Can J Psychiatry*. [Research Support, Non-U.S. Gov't]. 2005 Nov;50(13):832-7.
15. Modgill G, Jette N, Wang JL, Becker WJ, Patten SB. A population-based longitudinal community study of major depression and migraine. *Headache*. [Research Support, Non-U.S. Gov't]. 2012 Mar;52(3):422-32.
16. Antonaci F, Nappi G, Galli F, Manzoni GC, Calabresi P, Costa A. Migraine and psychiatric comorbidity: a review of clinical findings. *J Headache Pain*. Jan 6.



- 1  
2  
3  
4  
5  
6  
7  
8  
9  
10  
11  
12  
13  
14  
15  
16  
17  
18  
19  
20  
21  
22  
23  
24  
25  
26  
27  
28  
29  
30  
31  
32  
33  
34  
35  
36  
37  
38  
39  
40  
41  
42  
43  
44  
45  
46  
47  
48  
49  
50  
51  
52  
53  
54  
55  
56  
57  
58  
59  
60
17. Swartz KL, Pratt LA, Armenian HK, Lee LC, Eaton WW. Mental disorders and the incidence of migraine headaches in a community sample: results from the Baltimore Epidemiologic Catchment area follow-up study. *Arch Gen Psychiatry*. 2000 Oct;57(10):945-50.
  18. Merikangas KR, Angst J, Isler H. Migraine and psychopathology. Results of the Zurich cohort study of young adults. *Arch Gen Psychiatry*. 1990 Sep;47(9):849-53.
  19. Breslau N, Davis GC. Migraine, physical health and psychiatric disorder: a prospective epidemiologic study in young adults. *J Psychiatr Res*. 1993 Apr-Jun;27(2):211-21.
  20. Sheftell FD, Atlas SJ. Migraine and psychiatric comorbidity: from theory and hypotheses to clinical application. *Headache*. 2002 Oct;42(9):934-44.
  21. Merikangas KR, Merikangas JR, Angst J. Headache syndromes and psychiatric disorders: association and familial transmission. *J Psychiatr Res*. 1993 Apr-Jun;27(2):197-210.
  22. Gilmour H, Wilkins K. Migraine. *Health Rep*. 2001;12(2):23-40.
  23. Colman I, Garad Y, Zeng Y, Naicker K, Weeks M, Patten SB, et al. Stress and development of depression and heavy drinking in adulthood: moderating effects of childhood trauma. *Soc Psychiatry Psychiatr Epidemiol*. 2012 Jun 9.
  24. Statistics Canada. National Population Health Survey Cycle 1 (1994-1995). Public use microdata files documentation. Ottawa 1995.
  25. Statistics Canada. National Population Health Survey Cycle 7 (2006-2007). Public use microdata files documentation. Ottawa 2007.
  26. Kessler RC, Andrews G, Mroczek DK, Ustun B, Wittchen HU. The World Health Organization Composite International Diagnostic Interview short-form (CIDI-SF). *Int J Methods Psychiatr Res*. 1998;7(5):171-85.
  27. Cotton C. Recent developments in the low income cut offs. Ottawa: Statistics Canada; 2001.
  28. Blackburn-Munro G. Hypothalamo-pituitary-adrenal axis dysfunction as a contributory factor to chronic pain and depression. *Curr Pain Headache Rep*. [Review]. 2004 Apr;8(2):116-24.
  29. Sauro KM, Becker WJ. The stress and migraine interaction. *Headache*. [Review]. 2009 Oct;49(9):1378-86.
  30. Adelman LC, Adelman JU, Von Seggern R, Mannix LK. Venlafaxine extended release (XR) for the prophylaxis of migraine and tension-type headache: A retrospective study in a clinical setting. *Headache*. [Clinical Trial Research Support, Non-U.S. Gov't]. 2000 Jul-Aug;40(7):572-80.
  31. Silberstein SD, Goadsby PJ. Migraine: preventive treatment. *Cephalalgia: an international journal of headache*. [Review]. 2002 Sep;22(7):491-512.
  32. Penzien DB. Stress management for migraine: recent research and commentary. *Headache*. [Review]. 2009 Oct;49(9):1395-8.
  33. Martin PR, Forsyth MR, Reece J. Cognitive-behavioral therapy versus temporal pulse amplitude biofeedback training for recurrent headache. *Behav Ther*. [Randomized Controlled Trial]. 2007 Dec;38(4):350-63.
  34. Rains JC, Penzien DB, McCrory DC, Gray RN. Behavioral headache treatment: history, review of the empirical literature, and methodological critique. *Headache*. [Review]. 2005 May;45 Suppl 2:S92-109.

- 1
  - 2
  - 3
  - 4
  - 5
  - 6
  - 7
  - 8
  - 9
  - 10
  - 11
  - 12
  - 13
  - 14
  - 15
  - 16
  - 17
  - 18
  - 19
  - 20
  - 21
  - 22
  - 23
  - 24
  - 25
  - 26
  - 27
  - 28
  - 29
  - 30
  - 31
  - 32
  - 33
  - 34
  - 35
  - 36
  - 37
  - 38
  - 39
  - 40
  - 41
  - 42
  - 43
  - 44
  - 45
  - 46
  - 47
  - 48
  - 49
  - 50
  - 51
  - 52
  - 53
  - 54
  - 55
  - 56
  - 57
  - 58
  - 59
  - 60
35. Patten SB, Brandon-Christie J, Devji J, Sedmak B. Performance of the composite international diagnostic interview short form for major depression in a community sample. *Chronic Dis Can*. 2000;21(2):68-72.
36. Ustun TB, Kessler RC. Global burden of depressive disorders: the issue of duration. *Br J Psychiatry*. 2002 Sep;181:181-3.
37. Simon GE. Social and economic burden of mood disorders. *Biol Psychiatry*. 2003 Aug 1;54(3):208-15.
38. Stovner L, Hagen K, Jensen R, Katsarava Z, Lipton R, Scher A, et al. The global burden of headache: a documentation of headache prevalence and disability worldwide. *Cephalalgia*. 2007 Mar;27(3):193-210.
39. Mitsikostas DD, Thomas AM. Comorbidity of headache and depressive disorders. *Cephalalgia*. 1999 May;19(4):211-7.
40. Hung CI, Wang SJ, Hsu KH, Juang YY, Liu CY. Risk factors associated with migraine or chronic daily headache in out-patients with major depressive disorder. *Acta Psychiatr Scand*. 2005 Apr;111(4):310-5.

## ACKNOWLEDGMENTS

The authors would like to thank Ms. Irene Wong of Statistics Canada for her assistance with data access and use. The research and analysis are based on data from Statistics Canada and the opinions expressed do not represent the views of Statistics Canada.

## FUNDING

This research was undertaken, in part, thanks to funding from the Canada Research Chairs program for Dr. Colman.

## COMPETING INTERESTS

None declared

## AUTHOR CONTRIBUTIONS

SS and IC conceived and designed the study and interpreted the results. SS and YZ performed the data analysis. SS wrote the manuscript. All authors critically reviewed the manuscript.

## DATA SHARING STATEMENT

The data used for this study is housed and managed by Statistics Canada.

1  
2  
3  
4  
5  
6  
7  
8  
9  
10  
11  
12  
13  
14  
15  
16  
17  
18  
19  
20  
21  
22  
23  
24  
25  
26  
27  
28  
29  
30  
31  
32  
33  
34  
35  
36  
37  
38  
39  
40  
41  
42  
43  
44  
45  
46  
47  
48  
49

Table 1. Sample Characteristics Ages 18-64, % (SE)

| Variable                                                        | % (SE)       |
|-----------------------------------------------------------------|--------------|
| <b>N</b>                                                        | 9054         |
| <b>Sex</b>                                                      |              |
| Male                                                            | 50.31 (0.17) |
| Female                                                          | 49.69 (0.17) |
| <b>Baseline Migraine/Depression Comorbidity</b>                 |              |
| None                                                            | 85.41 (0.49) |
| Depression Only                                                 | 4.13 (0.29)  |
| Migraine Only                                                   | 9.13 (0.40)  |
| Depression and Migraine                                         | 1.33 (0.17)  |
| <b>Childhood Trauma</b>                                         |              |
| 0                                                               | 49.61 (0.74) |
| 1                                                               | 25.82 (0.64) |
| 2+                                                              | 24.57 (0.65) |
| <b>Recent Marital Change to Divorced, Separated, or Widowed</b> |              |
| Yes                                                             | 2.47 (0.23)  |
| No                                                              | 97.53 (0.23) |
| <b>Recent Unemployment</b>                                      |              |
| Yes                                                             | 4.34 (0.32)  |
| No                                                              | 95.66 (0.32) |
| <b>Recent Change in Social Support</b>                          |              |
| Yes                                                             | 16.76 (0.60) |
| No                                                              | 83.24 (0.60) |
| <b>Years of Follow-Up</b>                                       |              |
| Median                                                          | 7.30         |
| IQR                                                             | 6.29-7.67    |

For peer review only

Table 2. Adjusted hazard ratios for depression predicting migraine, adjusting for various stressors, age, and sex

|                                 | Model 1          | Model 2          | Model 3          | Model 4          | Model 5          | Model 6          | Model 7          | Model 8          | Model 9          |
|---------------------------------|------------------|------------------|------------------|------------------|------------------|------------------|------------------|------------------|------------------|
| <b>Depression</b>               |                  |                  |                  |                  |                  |                  |                  |                  |                  |
| Yes                             | 1.85 (1.20-2.85) | 1.62 (1.03-2.53) | 1.59 (1.03-2.46) | 1.56 (0.98-2.47) | 1.61 (1.02-2.53) | 1.52 (0.97-2.38) | 1.34 (0.84-2.13) | 1.61 (1.02-2.54) | 1.30 (0.80-2.10) |
| No                              | Reference        |
| <b>Childhood Trauma</b>         |                  |                  |                  |                  |                  |                  |                  |                  |                  |
| None                            |                  |                  | Reference        |                  |                  |                  |                  |                  | Reference        |
| 1                               |                  |                  | 0.95 (0.66-1.37) |                  |                  |                  |                  |                  | 0.90 (0.60-1.33) |
| 2+                              |                  |                  | 1.34 (1.00-1.79) |                  |                  |                  |                  |                  | 1.09 (0.79-1.51) |
| <b>Recent Marital Status</b>    |                  |                  |                  |                  |                  |                  |                  |                  |                  |
| <b>Change</b>                   |                  |                  |                  |                  |                  |                  |                  |                  |                  |
| Yes                             |                  |                  |                  | 1.54 (0.82-2.90) |                  |                  |                  |                  | 1.28 (0.59-2.75) |
| No                              |                  |                  |                  | Reference        |                  |                  |                  |                  | Reference        |
| <b>Recent Unemployment</b>      |                  |                  |                  |                  |                  |                  |                  |                  |                  |
| Yes                             |                  |                  |                  |                  | 1.00 (0.44-2.30) |                  |                  |                  | 0.72 (0.29-1.78) |
| No                              |                  |                  |                  |                  | Reference        |                  |                  |                  | Reference        |
| <b>Work Stress</b>              |                  |                  |                  |                  |                  |                  |                  |                  |                  |
| 1 <sup>st</sup> Quartile        |                  |                  |                  |                  |                  | Reference        |                  |                  | Reference        |
| 2 <sup>nd</sup> Quartile        |                  |                  |                  |                  |                  | 0.63 (0.42-0.95) |                  |                  | 0.61 (0.39-0.95) |
| 3 <sup>rd</sup> Quartile        |                  |                  |                  |                  |                  | 0.66 (0.45-0.96) |                  |                  | 0.63 (0.41-0.96) |
| 4 <sup>th</sup> Quartile        |                  |                  |                  |                  |                  | 0.89 (0.61-1.31) |                  |                  | 0.81 (0.52-1.27) |
| <b>Chronic Stress</b>           |                  |                  |                  |                  |                  |                  |                  |                  |                  |
| 1 <sup>st</sup> Quartile        |                  |                  |                  |                  |                  |                  | Reference        |                  | Reference        |
| 2 <sup>nd</sup> Quartile        |                  |                  |                  |                  |                  |                  | 0.91 (0.59-1.40) |                  | 0.99 (0.63-1.56) |
| 3 <sup>rd</sup> Quartile        |                  |                  |                  |                  |                  |                  | 1.58 (1.11-2.25) |                  | 1.64 (1.12-2.41) |
| 4 <sup>th</sup> Quartile        |                  |                  |                  |                  |                  |                  | 1.76 (1.22-2.53) |                  | 1.68 (1.08-2.61) |
| <b>Change in Social Support</b> |                  |                  |                  |                  |                  |                  |                  |                  |                  |
| Yes                             |                  |                  |                  |                  |                  |                  |                  | 0.77 (0.54-1.11) | 0.84 (0.58-1.21) |
| No                              |                  |                  |                  |                  |                  |                  |                  | Reference        | Reference        |
| <b>Sex</b>                      |                  |                  |                  |                  |                  |                  |                  |                  |                  |
| Male                            |                  | Reference        |
| Female                          |                  | 2.39 (1.83-3.12) | 2.34 (1.79-3.08) | 2.49 (1.90-3.26) | 2.44 (1.86-3.20) | 2.28 (1.73-2.99) | 2.39 (1.83-3.12) | 2.48 (1.89-3.25) | 2.32 (1.73-3.11) |
| <b>Age (continuous)</b>         |                  |                  |                  |                  |                  |                  |                  |                  |                  |
|                                 |                  | 0.98 (0.97-0.99) | 0.98 (0.97-0.99) | 0.98 (0.97-0.99) | 0.98 (0.97-0.99) | 0.98 (0.97-0.99) | 0.98 (0.97-0.99) | 0.98 (0.97-0.99) | 0.98 (0.97-0.99) |

Table 3. Adjusted hazard ratios for migraine predicting depression, adjusting for various stressors, age, and sex

|                                 | Model 1          | Model 2          | Model 3          | Model 4          | Model 5          | Model 6          | Model 7          | Model 8          | Model 9          |
|---------------------------------|------------------|------------------|------------------|------------------|------------------|------------------|------------------|------------------|------------------|
| <b>Migraine</b>                 |                  |                  |                  |                  |                  |                  |                  |                  |                  |
| Yes                             | 1.84 (1.38-2.45) | 1.55 (1.15-2.08) | 1.43 (1.06-1.92) | 1.46 (1.08-1.98) | 1.54 (1.14-2.08) | 1.51 (1.11-2.05) | 1.33 (0.98-1.79) | 1.46 (1.07-1.99) | 1.19 (0.86-1.66) |
| No                              | Reference        |
| <b>Childhood Trauma</b>         |                  |                  |                  |                  |                  |                  |                  |                  |                  |
| None                            |                  |                  | Reference        |                  |                  |                  |                  |                  | Reference        |
| 1                               |                  |                  | 1.23 (0.92-1.64) |                  |                  |                  |                  |                  | 1.14 (0.84-1.55) |
| 2+                              |                  |                  | 2.36 (1.79-3.12) |                  |                  |                  |                  |                  | 1.89 (1.38-2.59) |
| <b>Recent Marital Status</b>    |                  |                  |                  |                  |                  |                  |                  |                  |                  |
| <b>Change</b>                   |                  |                  |                  |                  |                  |                  |                  |                  |                  |
| Yes                             |                  |                  |                  | 0.91 (0.40-2.06) |                  |                  |                  |                  | 0.78 (0.33-1.84) |
| No                              |                  |                  |                  | Reference        |                  |                  |                  |                  | Reference        |
| <b>Recent Unemployed</b>        |                  |                  |                  |                  |                  |                  |                  |                  |                  |
| Yes                             |                  |                  |                  |                  | 1.52 (0.93-2.49) |                  |                  |                  | 1.16 (0.68-1.99) |
| No                              |                  |                  |                  |                  | Reference        |                  |                  |                  | Reference        |
| <b>Work Stress</b>              |                  |                  |                  |                  |                  |                  |                  |                  |                  |
| 1 <sup>st</sup> Quartile        |                  |                  |                  |                  |                  | Reference        |                  |                  | Reference        |
| 2 <sup>nd</sup> Quartile        |                  |                  |                  |                  |                  | 0.64 (0.48-0.85) |                  |                  | 0.70 (0.52-0.95) |
| 3 <sup>rd</sup> Quartile        |                  |                  |                  |                  |                  | 0.69 (0.50-0.94) |                  |                  | 0.76 (0.55-1.06) |
| 4 <sup>th</sup> Quartile        |                  |                  |                  |                  |                  | 1.12 (0.84-1.51) |                  |                  | 1.06 (0.77-1.48) |
| <b>Chronic Stress</b>           |                  |                  |                  |                  |                  |                  |                  |                  |                  |
| 1 <sup>st</sup> Quartile        |                  |                  |                  |                  |                  |                  | Reference        |                  | Reference        |
| 2 <sup>nd</sup> Quartile        |                  |                  |                  |                  |                  |                  | 1.45 (1.06-2.00) |                  | 1.47 (1.03-2.08) |
| 3 <sup>rd</sup> Quartile        |                  |                  |                  |                  |                  |                  | 2.02 (1.50-2.73) |                  | 1.89 (1.37-2.62) |
| 4 <sup>th</sup> Quartile        |                  |                  |                  |                  |                  |                  | 2.93 (2.20-3.88) |                  | 2.49 (1.80-3.44) |
| <b>Change in Social Support</b> |                  |                  |                  |                  |                  |                  |                  |                  |                  |
| Yes                             |                  |                  |                  |                  |                  |                  |                  | 0.91 (0.69-1.20) | 0.94 (0.71-1.23) |
| No                              |                  |                  |                  |                  |                  |                  |                  | Reference        | Reference        |
| <b>Sex</b>                      |                  |                  |                  |                  |                  |                  |                  |                  |                  |
| Male                            |                  | Reference        |
| Female                          |                  | 1.91 (1.52-2.39) | 1.86 (1.49-2.34) | 1.94 (1.55-2.44) | 1.92 (1.53-2.41) | 1.80 (1.43-2.27) | 1.89 (1.50-2.37) | 1.89 (1.50-2.39) | 1.83 (1.43-2.34) |
| <b>Age (continuous)</b>         |                  |                  |                  |                  |                  |                  |                  |                  |                  |
|                                 |                  | 0.98 (0.97-0.99) | 0.98 (0.97-0.99) | 0.98 (0.97-0.99) | 0.98 (0.97-0.99) | 0.98 (0.97-0.99) | 0.98 (0.97-0.99) | 0.98 (0.97-0.99) | 0.98 (0.97-0.99) |

STROBE Statement—Checklist of items that should be included in reports of *cohort studies*

|                              | Item No | Recommendation                                                                                                                                                                                                                                                                                                                                                                                                |
|------------------------------|---------|---------------------------------------------------------------------------------------------------------------------------------------------------------------------------------------------------------------------------------------------------------------------------------------------------------------------------------------------------------------------------------------------------------------|
| <b>Title and abstract</b>    | 1       | (a) Indicate the study's design with a commonly used term in the title or the abstract<br>(b) Provide in the abstract an informative and balanced summary of what was done and what was found                                                                                                                                                                                                                 |
| <b>Introduction</b>          |         |                                                                                                                                                                                                                                                                                                                                                                                                               |
| Background/rationale         | 2       | Explain the scientific background and rationale for the investigation being reported                                                                                                                                                                                                                                                                                                                          |
| Objectives                   | 3       | State specific objectives, including any prespecified hypotheses                                                                                                                                                                                                                                                                                                                                              |
| <b>Methods</b>               |         |                                                                                                                                                                                                                                                                                                                                                                                                               |
| Study design                 | 4       | Present key elements of study design early in the paper                                                                                                                                                                                                                                                                                                                                                       |
| Setting                      | 5       | Describe the setting, locations, and relevant dates, including periods of recruitment, exposure, follow-up, and data collection                                                                                                                                                                                                                                                                               |
| Participants                 | 6       | (a) Give the eligibility criteria, and the sources and methods of selection of participants. Describe methods of follow-up<br>(b) For matched studies, give matching criteria and number of exposed and unexposed                                                                                                                                                                                             |
| Variables                    | 7       | Clearly define all outcomes, exposures, predictors, potential confounders, and effect modifiers. Give diagnostic criteria, if applicable                                                                                                                                                                                                                                                                      |
| Data sources/<br>measurement | 8*      | For each variable of interest, give sources of data and details of methods of assessment (measurement). Describe comparability of assessment methods if there is more than one group                                                                                                                                                                                                                          |
| Bias                         | 9       | Describe any efforts to address potential sources of bias                                                                                                                                                                                                                                                                                                                                                     |
| Study size                   | 10      | Explain how the study size was arrived at                                                                                                                                                                                                                                                                                                                                                                     |
| Quantitative variables       | 11      | Explain how quantitative variables were handled in the analyses. If applicable, describe which groupings were chosen and why                                                                                                                                                                                                                                                                                  |
| Statistical methods          | 12      | (a) Describe all statistical methods, including those used to control for confounding<br>(b) Describe any methods used to examine subgroups and interactions<br>(c) Explain how missing data were addressed<br>(d) If applicable, explain how loss to follow-up was addressed<br>(e) Describe any sensitivity analyses                                                                                        |
| <b>Results</b>               |         |                                                                                                                                                                                                                                                                                                                                                                                                               |
| Participants                 | 13*     | (a) Report numbers of individuals at each stage of study—eg numbers potentially eligible, examined for eligibility, confirmed eligible, included in the study, completing follow-up, and analysed<br>(b) Give reasons for non-participation at each stage<br>(c) Consider use of a flow diagram                                                                                                               |
| Descriptive data             | 14*     | (a) Give characteristics of study participants (eg demographic, clinical, social) and information on exposures and potential confounders<br>(b) Indicate number of participants with missing data for each variable of interest<br>(c) Summarise follow-up time (eg, average and total amount)                                                                                                                |
| Outcome data                 | 15*     | Report numbers of outcome events or summary measures over time                                                                                                                                                                                                                                                                                                                                                |
| Main results                 | 16      | (a) Give unadjusted estimates and, if applicable, confounder-adjusted estimates and their precision (eg, 95% confidence interval). Make clear which confounders were adjusted for and why they were included<br>(b) Report category boundaries when continuous variables were categorized<br>(c) If relevant, consider translating estimates of relative risk into absolute risk for a meaningful time period |

|    |                          |    |                                                                                        |
|----|--------------------------|----|----------------------------------------------------------------------------------------|
| 1  | Other analyses           | 17 | Report other analyses done—eg analyses of subgroups and interactions, and              |
| 2  |                          |    | sensitivity analyses                                                                   |
| 3  |                          |    |                                                                                        |
| 4  | <b>Discussion</b>        |    |                                                                                        |
| 5  | Key results              | 18 | Summarise key results with reference to study objectives                               |
| 6  |                          |    |                                                                                        |
| 7  | Limitations              | 19 | Discuss limitations of the study, taking into account sources of potential bias or     |
| 8  |                          |    | imprecision. Discuss both direction and magnitude of any potential bias                |
| 9  |                          |    |                                                                                        |
| 10 | Interpretation           | 20 | Give a cautious overall interpretation of results considering objectives, limitations, |
| 11 |                          |    | multiplicity of analyses, results from similar studies, and other relevant evidence    |
| 12 | Generalisability         | 21 | Discuss the generalisability (external validity) of the study results                  |
| 13 |                          |    |                                                                                        |
| 14 | <b>Other information</b> |    |                                                                                        |
| 15 | Funding                  | 22 | Give the source of funding and the role of the funders for the present study and, if   |
| 16 |                          |    | applicable, for the original study on which the present article is based               |
| 17 |                          |    |                                                                                        |

18  
19 \*Give information separately for exposed and unexposed groups.

20  
21 **Note:** An Explanation and Elaboration article discusses each checklist item and gives methodological background and  
22 published examples of transparent reporting. The STROBE checklist is best used in conjunction with this article (freely  
23 available on the Web sites of PLoS Medicine at <http://www.plosmedicine.org/>, Annals of Internal Medicine at  
24 <http://www.annals.org/>, and Epidemiology at <http://www.epidem.com/>). Information on the STROBE Initiative is  
25 available at <http://www.strobe-statement.org>.  
26  
27  
28  
29  
30  
31  
32  
33  
34  
35  
36  
37  
38  
39  
40  
41  
42  
43  
44  
45  
46  
47  
48  
49  
50  
51  
52  
53  
54  
55  
56  
57  
58  
59  
60



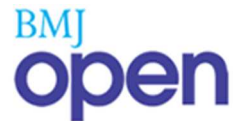

**The Contribution of Stress to the Comorbidity of Migraine and Major Depression: Results from a Prospective Cohort Study**

|                                 |                                                                                                                                                                                                                                                                                                                   |
|---------------------------------|-------------------------------------------------------------------------------------------------------------------------------------------------------------------------------------------------------------------------------------------------------------------------------------------------------------------|
| Journal:                        | <i>BMJ Open</i>                                                                                                                                                                                                                                                                                                   |
| Manuscript ID:                  | bmjopen-2012-002057.R1                                                                                                                                                                                                                                                                                            |
| Article Type:                   | Research                                                                                                                                                                                                                                                                                                          |
| Date Submitted by the Author:   | 05-Dec-2012                                                                                                                                                                                                                                                                                                       |
| Complete List of Authors:       | Swanson, Sonja; Harvard University, Harvard School of Public Health<br>Zeng, Yiye; University of Alberta, School of Public Health<br>Weeks, Murray; University of Ottawa, Department of Epidemiology and Community Medicine<br>Colman, Ian; University of Ottawa, Department of Epidemiology & Community Medicine |
| <b>Primary Subject Heading</b>: | Mental health                                                                                                                                                                                                                                                                                                     |
| Secondary Subject Heading:      | Epidemiology, Neurology                                                                                                                                                                                                                                                                                           |
| Keywords:                       | Migraine < NEUROLOGY, Depression & mood disorders < PSYCHIATRY, EPIDEMIOLOGY                                                                                                                                                                                                                                      |
|                                 |                                                                                                                                                                                                                                                                                                                   |

SCHOLARONE™  
Manuscripts

Number of References: 40

Abstract Word Count: 188

Main Text Word Count: 2,628

Tables: 3

Figures: 1

**The Contribution of Stress to the Comorbidity of Migraine and Major Depression:  
Results from a Prospective Cohort Study**

Sonja A. Swanson<sup>1</sup>, Yiye Zeng<sup>2</sup>, Murray Weeks<sup>3</sup>, Ian Colman<sup>2,3</sup>

<sup>1</sup> Department of Epidemiology, Harvard School of Public Health, Boston, MA, USA

<sup>2</sup> School of Public Health, University of Alberta, Edmonton, AB, Canada

<sup>3</sup> Department of Epidemiology and Community Medicine, University of Ottawa, Ottawa, ON, Canada

Corresponding Author: Dr. Ian Colman, Assistant Professor, Department of Epidemiology and Community Medicine, University of Ottawa, 451 Smyth Road, Room 3230C, Ottawa, ON, K1H 8M5, CANADA

Email: [icolman@uottawa.ca](mailto:icolman@uottawa.ca) Tel: +1 613 562 5800 ext. 8715

Keywords: migraine, major depression, stress, trauma

## Abstract

**Objectives:** To estimate the comorbidity of migraine and major depression, and to assess how much this association may be explained by various measures of stress, including prior and current forms of stress.

**Design:** National Population Health Survey is a prospective cohort study representative of the Canadian population. Eight years of follow-up time were used in the present analyses.

**Setting:** Canadian adult population ages 18-64

**Participants:** 9,288 participants

**Outcome:** Incident migraine and major depression

**Results:** Adjusting for sex and age, depression was predictive of incident migraine (HR: 1.62; 95% CI: 1.03-2.53) and migraine was predictive of incident depression (HR: 1.55; 95% CI: 1.15-2.08). However, adjusting for each stressor we operationalized (childhood trauma, recent marital problems, recent unemployment, recent household financial problems, work stress, chronic stress, and change in social support) decreased this association, with chronic stress being a particularly strong covariate. After further adjusting for all stressors, both effects were largely attenuated and no longer significant (depression-migraine HR: 1.30; 95% CI: 0.80-2.10; migraine-depression HR: 1.19; 95% CI: 0.86-1.66).

**Conclusions:** While there appears to be temporal bidirectionality in the migraine-depression comorbidity, much of the apparent association is explained by stress.

## ARTICLE SUMMARY

### Article Focus

- To understand how much and what kinds of stressors play a role in explaining the comorbidity seen between migraine and major depression

### Key Messages

- Migraine headache and major depression each predict the other prospectively
- Stress, particularly chronic stress, appears to explain much of the association seen between migraine and major depression

### Strengths and Limitations

- Large, representative, prospective cohort study
- Migraine was self-reported with only a single question

## INTRODUCTION

Several studies support that migraine and psychopathologies, in particular major depression, often co-occur.<sup>[1-15]</sup> In a recent review of such comorbidities, Antonaci et al reported a meta-analysis of 12 studies, concluding that the odds ratio may be near 2.2 for major depression and migraine.<sup>[16]</sup> A limited number of prospective studies have examined the temporality of this association, largely concluding the predictive relationship is bidirectional (i.e., migraine status predicts depression onset and vice versa).<sup>[1, 2, 10]</sup> While the correlation has been well established, the mechanisms for this co-occurrence are less clear; causal paths may exist from one disorder to the other, and/or some shared common risk factor(s) (i.e., confounders) may cause both depression and migraine.

Migraine and depression indeed share several risk factors, and thus any perceived correlation between the two could potentially be due to this confounding. Prior research assessing their association has adjusted primarily for demographic variables, however some studies have separately studied other risk factors of a genetic and neurobiologic nature. Few studies, however, have focused on stress, a known risk factor for both migraine and depression. In Modgill and colleagues' analyses of the National Population Health Survey (NPHS), a representative longitudinal study of the Canadian population, childhood trauma attenuated the association between the two disorders, particularly for the direction of depression predicting migraine onset.<sup>[10]</sup> However, their analyses only looked at a limited number of stressors and did not attempt to address specifically how much different types of stressors may contribute to this association. A variety of stressors may confound the migraine-depression association, as many types have been found to be

1  
2  
3 risk factors for both disorders: e.g., childhood trauma,<sup>[10, 17]</sup> unemployment,<sup>[18, 19]</sup>  
4  
5 chronic/repeated stress,<sup>[20, 21]</sup> etc.  
6  
7

8  
9 In the current study, we extend upon Modgill et al's findings in the NPHS to  
10  
11 assess how much the association between migraine and depression may be explained by  
12  
13 various measures of stress, including a wide variety of prior and current stressors. We  
14  
15 assess this association longitudinally and bidirectionally.  
16  
17  
18  
19  
20  
21  
22  
23  
24  
25  
26  
27  
28  
29  
30  
31  
32  
33  
34  
35  
36  
37  
38  
39  
40  
41  
42  
43  
44  
45  
46  
47  
48  
49  
50  
51  
52  
53  
54  
55  
56  
57  
58  
59  
60

## METHODS

### *Sample*

The NPHS is a prospective, nationally representative study conducted by Statistics Canada that has followed a Canadian cohort since 1994/95. At study inception, individuals were randomly selected using a stratified two-stage sample design (n=17,276). The sample has been contacted every two years, with the most recent data collection in 2008/09.

For the purposes of this study, we restricted our sample to individuals aged 18 to 64 years in Cycle 4 (2000/01), with this assessment treated as “baseline” in the presented analyses. This serves two purposes: (1) as both migraine and depression assessments reflect current states rather than diagnostic histories, this allows us to use the first three assessments to construct a several-year history of each disorder prior to baseline; and (2) as some of the stressors were not assessed until this time (e.g., work stress, chronic stress) or could not be constructed without at least two assessments (e.g., change in social support, marital status, or employment), this allows a more complete analysis of the role of stressors in the migraine-depression comorbidity. Further information on our analytic sample is depicted in **Figure 1**.

### *Depression*

Major depressive episodes are assessed using the Composite International Diagnostic Interview Short Form for Major Depression (CIDI-SFMD) at all eight cycles. The CIDI-SFMD inquires about symptoms of major depression, as defined by the Diagnostic and Statistical Manual of Mental Disorders IV (DSM-IV), during the

1  
2  
3 preceding 12 months. Kessler and colleagues<sup>[22]</sup> showed that the CIDI-SF has 93%  
4  
5 classification accuracy for major depressive episode when compared with the full-length  
6  
7 CIDI. Individuals who endorse five or more symptoms during a single two-week period  
8  
9 are considered to have a 90% probability of having major depression,<sup>[22]</sup> for the purposes  
10  
11 of this study, such individuals will be considered as having major depression in that year.  
12  
13

### 14 15 16 *Migraine*

17  
18 Migraine is assessed in a single diagnostic question at each assessment. In the first  
19  
20 three assessments (1994/95; 1996/97; 1998/99), subjects were asked whether they  
21  
22 currently were having migraine headaches that had been diagnosed by a health  
23  
24 professional. In the subsequent five assessments (2000/01; 2002/03; 2004/05; 2006/07;  
25  
26 2008/09), subjects were asked whether they currently have migraine headaches. In these  
27  
28 last five assessments, subjects were further asked about the timing of onset of the  
29  
30 diagnosis.  
31  
32  
33

### 34 35 36 *Stressors*

37  
38 Using similar definitions as previous studies using NPHS data,<sup>[17]</sup> we defined  
39  
40 several types of stressors: childhood trauma, recent marital problems, recent  
41  
42 unemployment, recent household financial problems, work stress, chronic stress, and  
43  
44 change in social support. Childhood trauma was assessed in Cycle 1 (1994/95) for those  
45  
46 18 or older at that time, and in Cycle 4 (2000/01) for the rest of our cohort. Subjects were  
47  
48 asked about seven items of childhood trauma occurring prior to the individual turning 18:  
49  
50 parental divorce, a lengthy hospital stay, prolonged parental unemployment, frequent  
51  
52 parental alcohol or drug use and physical abuse. Childhood trauma was categorized as  
53  
54 none, one event, and two or more events. Three recent stressful life changes were  
55  
56  
57  
58  
59  
60



1  
2  
3 defined: marital problems, recent unemployment, and household financial problems.  
4  
5 Marital problems were defined by a change from reporting single, married, or partnered  
6  
7 in Cycle 3 (1998/99) to divorced, widowed, or separated in Cycle 4 (2000/01). Recent  
8  
9 unemployment was defined as being employed in Cycle 3 (1998/99) but reporting  
10  
11 unemployment or not being in the labor force in Cycle 4 (2000/01). Household financial  
12  
13 problems were defined as having a score above Statistic Canada's low income cut-off  
14  
15 (LICO) in Cycle 3 (1998/99) followed by a score below the cut-off in Cycle 4 (2000/01).  
16  
17 The LICO score takes into account the individual's income relative to the community in  
18  
19 which an individual lives and the size of their household.<sup>[23,24]</sup> Work stress was measured  
20  
21 in Cycle 4 (2000/01) by 13 questions that assessed job security, autonomy, conflict and  
22  
23 satisfaction;<sup>[24]</sup> the score was categorized by quartiles. Chronic stress was measured in  
24  
25 Cycle 4 (2000/01) by 18 questions that assessed stress in one's personal life, focusing  
26  
27 primarily on relationships and family strife;<sup>[24]</sup> this score was also broken into quartiles.  
28  
29 Social support was measured by a 4-question scale in Cycles 3 and 4 (1998/99;  
30  
31 2000/01);<sup>[24]</sup> this score was dichotomized at the median, and change in social support was  
32  
33 conceptualized as a change from high to low social support.  
34  
35  
36  
37  
38  
39  
40  
41

#### 42 *Statistical Analyses*

43  
44 We performed two sets of analyses. First, among those with no history of major  
45  
46 depression (unweighted n=7,818), we assessed the onset of incident major depression  
47  
48 comparing those with and without migraine at baseline; second, among those with no  
49  
50 history of migraine (unweighted n=7,765), we assessed the onset of incident migraine  
51  
52 comparing those with and without major depression at baseline. Cox Proportional  
53  
54 Hazards Models were fit, and hazards ratios (HR) and their 95% confidence intervals (CI)  
55  
56  
57  
58  
59  
60

1  
2  
3 are presented. Models are presented as unadjusted; adjusting for sex and age; adjusting  
4  
5 for sex, age, and each stress exposure individually; and adjusting for sex, age, and all  
6  
7 stress exposures. Data analyses were completed using SAS 9.2 and SUDAAN 10.0.1. All  
8  
9 estimates were weighted to adjust for unequal selection probabilities and cluster  
10  
11 sampling; weights further adjust for attrition between the first and fourth cycle. Standard  
12  
13 errors were calculated using the bootstrap method.  
14  
15  
16  
17  
18  
19  
20  
21  
22  
23  
24  
25  
26  
27  
28  
29  
30  
31  
32  
33  
34  
35  
36  
37  
38  
39  
40  
41  
42  
43  
44  
45  
46  
47  
48  
49  
50  
51  
52  
53  
54  
55  
56  
57  
58  
59  
60

## RESULTS

Demographic information is presented in **Table 1**. At baseline, 4.13, 9.13, and 1.33% of the sample reported current depression only, migraine only, and comorbid depression and migraine, respectively.

Models for depression status predicting incident migraine are presented in **Table 2**. Among non-migraineurs in Cycle 4 (2000/01), 5.52% developed migraine during the eight-year follow-up. The sex- and age-adjusted model suggested depression was predictive of incident migraine (HR: 1.62; 95% CI: 1.03-2.53). When adjusting further for stressors in separate models, estimates were further attenuated; adjusting for chronic stress attenuated the estimate the most (HR: 1.34; 95% CI: 0.84-2.13). When adjusting for all forms of stressors simultaneously, the depression-migraine estimate was attenuated by 19.75% (HR: 1.30; 95% CI: 0.80-2.10).

Models for migraine status predicting incident depression are presented in **Table 3**. Among subjects who had not had a depression up through Cycle 4 (2000/01), 8.72% developed incident depression. Migraine status was predictive of incident depression in the age- and sex-adjusted model (HR: 1.55; 95% CI: 1.15-2.08). Adjusting for stressors in separate models attenuated this relationship, with adjustment for chronic stress affecting the estimate the most (HR: 1.33; 95% CI: 0.98-1.79). The fully adjusted model estimate was attenuated by 23.23%, estimating a migraine-depression HR of 1.19 (95% CI: 0.86-1.66).

## DISCUSSION

Without considering common causes or other explanations, these results align with earlier findings supporting a bidirectionality to a migraine-depression association: in crude analyses, migraine status predicted incident depression, and depression status predicted incident migraine. However, both directions of this relationship are largely explained by stressors that likely increase risk for both migraine and depression: adjusting for all measured forms of stress in these surveys attenuated the each estimate by about 20% and the associations were no longer significant after adjustment. Implications for research as well as clinical and public health practice are discussed.

Importantly, all stressors studied here did attenuate the results, suggesting that any form of stress may be an important common cause to consider when studying migraine and depression. This finding follows from prior research that supports both acute and chronic forms of stress as being confounders, since these have been shown to predict depression and migraine.<sup>[10, 17-21]</sup> The present study suggests that prior studies that these stressors collectively explain much of the perceived migraine-depression association; research that does not account for these common causes when studying depression and migraine may be presenting misleading estimates.

While all types of stressors did attenuate the results, the strongest risk factor in both sets of models was chronic stress. This fits into a broader context of research suggesting that chronic stress may be causative of various types of chronic pain and major depression. In disentangling the relationship between depression, chronic stress, and chronic pain such as fibromyalgia, it has been proposed that chronic stress may lead to dysfunction in the hypothalamic-pituitary-adrenal axis, which in turn could lead to both

1  
2  
3 depression and some forms of chronic pain.<sup>[25]</sup> Research specific to stress and migraine  
4 supports this biological theory.<sup>[26]</sup> Notably, childhood trauma was a strong risk factor in  
5 migraine predicting depression; as many of the types of trauma assessed were chronic in  
6 nature, this aligns with the finding that perhaps chronic forms of stress are especially  
7 potent common causes of migraine and depression.  
8  
9  
10  
11  
12  
13

14  
15  
16 Although certainly some of the crude association between depression and  
17 migraine may still be explained by genetics, other common causes, and/or biological  
18 pathways between the two disorders, the current findings suggest interesting  
19 considerations when developing future intervention strategies. Given the possibility of a  
20 biological mechanism between these two disorders, much research attention has been  
21 focused on the efficacy of antidepressant medications on preventing and managing  
22 migraine, with mixed success.<sup>[27-29]</sup> However, the current study suggests that perhaps a  
23 primary strategy could target reducing stress, particularly chronic stress, as this may both  
24 reduce the burden of the index disorder as well as potentially prevent the second  
25 condition from occurring. Indeed, there have been studies showing that various  
26 behavioural or stress management therapies (e.g., Cognitive-Behavioral Therapy) are  
27 effective treatments for migraine, supporting one aspect of this hypothesis.<sup>[30-32]</sup> Given  
28 how much chronic stress and other stressors seem to explain the comorbidity, such a  
29 strategy may have the potential for reducing this comorbidity burden on a larger scale  
30 than some of these other postulated pharmacological strategies, although further research  
31 actually comparing such treatment strategies would be needed. Utilizing a stress-reducing  
32 strategy to address this comorbidity assumes that stress is (directly or indirectly)  
33  
34  
35  
36  
37  
38  
39  
40  
41  
42  
43  
44  
45  
46  
47  
48  
49  
50  
51  
52  
53  
54  
55  
56  
57  
58  
59  
60

1  
2  
3 causative of both disorders, while it is possible that stress is a risk factor through  
4  
5 associations with a common cause.  
6  
7

8  
9 The study has numerous strengths. This is one of only a few studies to  
10 prospectively assess the migraine-depression comorbidity bidirectionally,<sup>[1, 2, 10]</sup> and  
11 extends these previous findings by examining whether a rich assortment of widely-used  
12 stress measures explained the associations found. The nationally-representative nature of  
13 the study aids the generalizability of these findings, and the sample size and length of  
14 follow-up are exceptional.  
15  
16  
17  
18  
19  
20  
21  
22

23 However, certain limitations warrant consideration. Migraine was assessed as  
24 only a single, self-reported question at each cycle. Self-reported symptom-based  
25 assessments do generally report a higher prevalence than doctor diagnoses;<sup>[33]</sup> the  
26 assessment in the NPHS inquires about diagnosis by a health professional which may  
27 offset some of this over-reporting, but certainly misclassification may still be an issue.  
28 Specifically, self-report may be further inflated in depressed individuals, which may  
29 actually contribute to some overestimation in our associations. While the measure of  
30 major depression (CIDI-SFMD) has demonstrated psychometric properties,<sup>[22, 34, 35]</sup> the  
31 12-month diagnosis (which thus does not cover the 2 years between each study  
32 assessment) hinders inference about history of major depression, possible episodes  
33 unmeasured in the gap years of the study, and actual timing of onset of the disorder;  
34 subjects who have less frequent depressive episodes or episodes that are shorter in  
35 duration would be less likely to be measured accurately. However, by using an interim  
36 cycle as “baseline”, we were able to construct over a half-decade profile of subjects’  
37 “history” of major depression to diminish the issue regarding assessing history. Finally,  
38  
39  
40  
41  
42  
43  
44  
45  
46  
47  
48  
49  
50  
51  
52  
53  
54  
55  
56  
57  
58  
59  
60

1  
2  
3 we did not have complete follow-up for all subjects. Weighting was used to correct for  
4 attrition between Cycles 1 and 4. From Cycle 4 through 8 the majority of subjects were  
5 assessed eight years later (see **Figure 1**), and follow-up duration was not associated with  
6 migraine or depression status at baseline. Follow-up duration, however, was associated  
7 with age and a few stressors (greater chronic stress, recent unemployment, and recent  
8 divorce were associated with shorter follow-up;  $p$ 's<0.05); however, as stress likely  
9 predicts higher levels of the outcome disorders, its likely this implies that some subjects  
10 were censored prior to onset of the outcome, meaning that stress would explain even  
11 more of the association measured had complete follow-up occurred.  
12  
13  
14  
15  
16  
17  
18  
19  
20  
21  
22  
23  
24

25 These analyses highlight considerations for future research. These analyses  
26 represent a rich assortment of stressors, but several other stressors may also merit  
27 examination, e.g., childhood sexual abuse, acute recent traumas such as injury or illness,  
28 etc. Further, as some of the stressors were only assessed in one or two cycles, we were  
29 not able to fully address the time-varying nature of the relationships between stress and  
30 these episodic conditions. Given that we found recent and prior stress to be relevant in  
31 this comorbidity, future research may wish to more closely examine the time-varying  
32 relationship between stress and these two conditions individually and comorbidly.  
33 Specifically, while stress is a risk factor for both disorders, it may also be caused by each  
34 disorder, and thus assessing temporal relationships using models that account for time-  
35 varying confounding appropriately (e.g., marginal structural models), may highlight the  
36 relationship between these variables further.  
37  
38  
39  
40  
41  
42  
43  
44  
45  
46  
47  
48  
49  
50  
51  
52

53 Understanding the causal mechanisms underlying the migraine-depression  
54 comorbidity may have a major public health impact. Major depression is a chief cause of  
55  
56  
57  
58  
59  
60

1  
2  
3 disability worldwide,<sup>[36]</sup> estimated by the World Health Organization to become the  
4  
5 second leading cause of disease burden by the year 2020.<sup>[37]</sup> Meanwhile, migraine affects  
6  
7 11% of the adult population, and when combined with other headache disorders also  
8  
9 makes it into the top ten causes of disability by World Health Organization estimates.<sup>[38]</sup>  
10  
11 Moreover, studies suggest that the disability and burden of these disorders may be  
12  
13 compounded when present together;<sup>[5]</sup> disease severity appears greater when these  
14  
15 disorders are comorbid, e.g., frequency and duration of migraine attacks have a  
16  
17 significant association with psychiatric comorbidity.<sup>[39]</sup> Migraine patients with a  
18  
19 psychiatric disorder report generally lower quality of life than other migraine patients;<sup>[8]</sup>  
20  
21 in parallel, depression patients who report migraine also report poorer quality of life  
22  
23 compared to other depression patients.<sup>[40]</sup> As such, implementation of effective stress-  
24  
25 management strategies for migraineurs and those suffering from depression (as well as  
26  
27 similar strategies to prevent the index disorder onset) may have major implications for  
28  
29 prevention and intervention strategies that may lower the societal costs and burdens of  
30  
31 both disorders.  
32  
33  
34  
35  
36  
37  
38  
39  
40  
41  
42  
43  
44  
45  
46  
47  
48  
49  
50  
51  
52  
53  
54  
55  
56  
57  
58  
59  
60



## REFERENCES

1. Breslau N, Lipton RB, Stewart WF, Schultz LR, Welch KM. Comorbidity of migraine and depression: investigating potential etiology and prognosis. *Neurology*. 2003 Apr 22;60(8):1308-12.
2. Breslau N, Schultz LR, Stewart WF, Lipton RB, Lucia VC, Welch KM. Headache and major depression: is the association specific to migraine? *Neurology*. 2000 Jan 25;54(2):308-13.
3. Camarda C, Pipia C, Tagliavori A, Di Fiore P, Camarda R, Monastero R. Comorbidity between depressive symptoms and migraine: preliminary data from the Zabut Aging Project. *Neurol Sci*. 2008 May;29 Suppl 1:S149-51.
4. Hung CI, Liu CY, Cheng YT, Wang SJ. Migraine: a missing link between somatic symptoms and major depressive disorder. *J Affect Disord*. 2009 Sep;117(1-2):108-15.
5. Jette N, Patten S, Williams J, Becker W, Wiebe S. Comorbidity of migraine and psychiatric disorders--a national population-based study. *Headache*. 2008 Apr;48(4):501-16.
6. Kececi H, Dener S, Analan E. Co-morbidity of migraine and major depression in the Turkish population. *Cephalalgia*. 2003 May;23(4):271-5.
7. Lanteri-Minet M, Valade D, Geraud G, Chautard MH, Lucas C. Migraine and probable migraine--results of FRAMIG 3, a French nationwide survey carried out according to the 2004 IHS classification. *Cephalalgia*. 2005 Dec;25(12):1146-58.
8. Lipton RB, Hamelsky SW, Kolodner KB, Steiner TJ, Stewart WF. Migraine, quality of life, and depression: a population-based case-control study. *Neurology*. 2000 Sep 12;55(5):629-35.
9. McWilliams LA, Goodwin RD, Cox BJ. Depression and anxiety associated with three pain conditions: results from a nationally representative sample. *Pain*. 2004 Sep;111(1-2):77-83.
10. Modgill G, Jette N, Wang JL, Becker WJ, Patten SB. A population-based longitudinal community study of major depression and migraine. *Headache*. [Research Support, Non-U.S. Gov't]. 2012 Mar;52(3):422-32.
11. Molgat CV, Patten SB. Comorbidity of major depression and migraine--a Canadian population-based study. *Can J Psychiatry*. [Research Support, Non-U.S. Gov't]. 2005 Nov;50(13):832-7.
12. Ratcliffe GE, Enns MW, Jacobi F, Belik SL, Sareen J. The relationship between migraine and mental disorders in a population-based sample. *Gen Hosp Psychiatry*. 2009 Jan-Feb;31(1):14-9.
13. Rhee H. Prevalence and predictors of headaches in US adolescents. *Headache*. 2000 Jul-Aug;40(7):528-38.
14. Samaan Z, Farmer A, Craddock N, Jones L, Korszun A, Owen M, et al. Migraine in recurrent depression: case-control study. *Br J Psychiatry*. 2009 Apr;194(4):350-4.
15. Wang SJ, Liu HC, Fuh JL, Liu CY, Wang PN, Lu SR. Comorbidity of headaches and depression in the elderly. *Pain*. 1999 Sep;82(3):239-43.
16. Antonaci F, Nappi G, Galli F, Manzoni GC, Calabresi P, Costa A. Migraine and psychiatric comorbidity: a review of clinical findings. *J Headache Pain*. Jan 6.

- 1  
2  
3  
4  
5  
6  
7  
8  
9  
10  
11  
12  
13  
14  
15  
16  
17  
18  
19  
20  
21  
22  
23  
24  
25  
26  
27  
28  
29  
30  
31  
32  
33  
34  
35  
36  
37  
38  
39  
40  
41  
42  
43  
44  
45  
46  
47  
48  
49  
50  
51  
52  
53  
54  
55  
56  
57  
58  
59  
60
17. Colman I, Garad Y, Zeng Y, Naicker K, Weeks M, Patten SB, et al. Stress and development of depression and heavy drinking in adulthood: moderating effects of childhood trauma. *Soc Psychiatry Psychiatr Epidemiol*. 2012 Jun 9.
18. Le H, Tfelt-Hansen P, Skytthe A, Kyvik KO, Olesen J. Association between migraine, lifestyle and socioeconomic factors: a population-based cross-sectional study. *The journal of headache and pain*. [Twin Study]. 2011 Apr;12(2):157-72.
19. Gili M, Roca M, Basu S, McKee M, Stuckler D. The mental health risks of economic crisis in Spain: evidence from primary care centres, 2006 and 2010. *Eur J Public Health*. 2012 Apr 19.
20. Maleki N, Becerra L, Borsook D. Migraine: maladaptive brain responses to stress. *Headache*. 2012 Oct;52 Suppl 2:102-6.
21. Risch N, Herrell R, Lehner T, Liang KY, Eaves L, Hoh J, et al. Interaction between the serotonin transporter gene (5-HTTLPR), stressful life events, and risk of depression: a meta-analysis. *Jama*. [Meta-Analysis
- Research Support, N.I.H., Extramural
- Research Support, N.I.H., Intramural]. 2009 Jun 17;301(23):2462-71.
22. Kessler RC, Andrews G, Mroczek DK, Ustun B, Wittchen HU. The World Health Organization Composite International Diagnostic Interview short-form (CIDI-SF). *Int J Methods Psychiatr Res*. 1998;7(5):171-85.
23. Cotton C. Recent developments in the low income cut offs. Ottawa: Statistics Canada; 2001.
24. Statistics Canada. National Population Health Survey Cycle 1 (1994-1995). Public use microdata files documentation. Ottawa 1995.
25. Blackburn-Munro G. Hypothalamo-pituitary-adrenal axis dysfunction as a contributory factor to chronic pain and depression. *Curr Pain Headache Rep*. [Review]. 2004 Apr;8(2):116-24.
26. Sauro KM, Becker WJ. The stress and migraine interaction. *Headache*. [Review]. 2009 Oct;49(9):1378-86.
27. Adelman LC, Adelman JU, Von Seggern R, Mannix LK. Venlafaxine extended release (XR) for the prophylaxis of migraine and tension-type headache: A retrospective study in a clinical setting. *Headache*. [Clinical Trial
- Research Support, Non-U.S. Gov't]. 2000 Jul-Aug;40(7):572-80.
28. Sheftell FD, Atlas SJ. Migraine and psychiatric comorbidity: from theory and hypotheses to clinical application. *Headache*. 2002 Oct;42(9):934-44.
29. Silberstein SD, Goadsby PJ. Migraine: preventive treatment. *Cephalalgia: an international journal of headache*. [Review]. 2002 Sep;22(7):491-512.
30. Martin PR, Forsyth MR, Reece J. Cognitive-behavioral therapy versus temporal pulse amplitude biofeedback training for recurrent headache. *Behav Ther*. [Randomized Controlled Trial]. 2007 Dec;38(4):350-63.
31. Penzien DB. Stress management for migraine: recent research and commentary. *Headache*. [Review]. 2009 Oct;49(9):1395-8.
32. Rains JC, Penzien DB, McCrory DC, Gray RN. Behavioral headache treatment: history, review of the empirical literature, and methodological critique. *Headache*. [Review]. 2005 May;45 Suppl 2:S92-109.

- 1  
2  
3  
4  
5  
6  
7  
8  
9  
10  
11  
12  
13  
14  
15  
16  
17  
18  
19  
20  
21  
22  
23  
24  
25  
26  
27  
28  
29  
30  
31  
32  
33  
34  
35  
36  
37  
38  
39  
40  
41  
42  
43  
44  
45  
46  
47  
48  
49  
50  
51  
52  
53  
54  
55  
56  
57  
58  
59  
60
33. Cousins G, Hijazze S, Van de Laar FA, Fahey T. Diagnostic accuracy of the ID Migraine: a systematic review and meta-analysis. *Headache*. [Meta-Analysis Research Support, Non-U.S. Gov't Review]. 2011 Jul-Aug;51(7):1140-8.
34. Patten SB. Performance of the Composite International Diagnostic Interview Short Form for major depression in community and clinical samples. *Chronic Dis Can*. [Comparative Study]. 1997;18(3):109-12.
35. Patten SB, Brandon-Christie J, Devji J, Sedmak B. Performance of the composite international diagnostic interview short form for major depression in a community sample. *Chronic Dis Can*. 2000;21(2):68-72.
36. Ustun TB, Kessler RC. Global burden of depressive disorders: the issue of duration. *Br J Psychiatry*. 2002 Sep;181:181-3.
37. Simon GE. Social and economic burden of mood disorders. *Biol Psychiatry*. 2003 Aug 1;54(3):208-15.
38. Stovner L, Hagen K, Jensen R, Katsarava Z, Lipton R, Scher A, et al. The global burden of headache: a documentation of headache prevalence and disability worldwide. *Cephalalgia*. 2007 Mar;27(3):193-210.
39. Mitsikostas DD, Thomas AM. Comorbidity of headache and depressive disorders. *Cephalalgia*. 1999 May;19(4):211-7.
40. Hung CI, Wang SJ, Hsu KH, Juang YY, Liu CY. Risk factors associated with migraine or chronic daily headache in out-patients with major depressive disorder. *Acta Psychiatr Scand*. 2005 Apr;111(4):310-5.

## ACKNOWLEDGMENTS

The authors would like to thank Ms. Irene Wong of Statistics Canada for her assistance with data access and use. The research and analysis are based on data from Statistics Canada and the opinions expressed do not represent the views of Statistics Canada.

## FUNDING

This research was undertaken, in part, thanks to funding from the Canada Research Chairs program for Dr. Colman. Funders had no role in study design, data collection and analysis, decision to publish, or preparation of the manuscript.

## COMPETING INTERESTS

None declared

## AUTHOR CONTRIBUTIONS

SS and IC conceived and designed the study and interpreted the results. SS, YZ and MW performed the data analysis. SS wrote the manuscript. All authors critically reviewed the manuscript.

Table 1. Sample Characteristics Ages 18-64, % (SE)

| Variable                                                        | Unweighted N | % (SE)        |
|-----------------------------------------------------------------|--------------|---------------|
| <b>N</b>                                                        | 9,342        |               |
| <b>Sex</b>                                                      |              |               |
| Male                                                            | 4,986        | 50.31 (0.17)  |
| Female                                                          | 4,356        | 49.69 (0.17)  |
| <b>Age, mean (range)</b>                                        |              | 40.77 (18-64) |
| <b>Baseline Migraine/Depression Comorbidity</b>                 |              |               |
| None                                                            | 7,619        | 85.41 (0.49)  |
| Depression Only                                                 | 404          | 4.13 (0.29)   |
| Migraine Only                                                   | 839          | 9.13 (0.40)   |
| Depression and Migraine                                         | 124          | 1.33 (0.17)   |
| <b>Childhood Trauma</b>                                         |              |               |
| 0                                                               | 4,194        | 49.61 (0.74)  |
| 1                                                               | 2,265        | 25.82 (0.64)  |
| 2+                                                              | 2,274        | 24.57 (0.65)  |
| <b>Recent Marital Change to Divorced, Separated, or Widowed</b> |              |               |
| Yes                                                             | 214          | 2.47 (0.23)   |
| No                                                              | 8,781        | 97.53 (0.23)  |
| <b>Recent Unemployment</b>                                      |              |               |
| Yes                                                             | 394          | 4.34 (0.32)   |
| No                                                              | 8,670        | 95.66 (0.32)  |
| <b>Recent Change in Social Support</b>                          |              |               |
| Yes                                                             | 1,359        | 16.76 (0.60)  |
| No                                                              | 6,961        | 83.24 (0.60)  |
| <b>Years of Follow-Up</b>                                       |              |               |
| Median                                                          |              | 7.30          |
| IQR                                                             |              | 6.29-7.67     |

Table 2. Adjusted hazard ratios for depression predicting migraine, adjusting for various stressors, age, and sex

|                                     | Model 1<br>(n=7,076) | Model 2<br>(n=7,076) | Model 3<br>(n=6,678) | Model 4<br>(n=6,868) | Model 5<br>(n=6,953) | Model 6<br>(n=7,064) | Model 7<br>(n=7,044) | Model 8<br>(n=7,076) | Model 9<br>(n=6,339) |
|-------------------------------------|----------------------|----------------------|----------------------|----------------------|----------------------|----------------------|----------------------|----------------------|----------------------|
| <b>Depression</b>                   |                      |                      |                      |                      |                      |                      |                      |                      |                      |
| Yes                                 | 1.85 (1.20-2.85)     | 1.62 (1.03-2.53)     | 1.59 (1.03-2.46)     | 1.56 (0.98-2.47)     | 1.61 (1.02-2.53)     | 1.52 (0.97-2.38)     | 1.34 (0.84-2.13)     | 1.61 (1.02-2.54)     | 1.30 (0.80-2.10)     |
| No                                  | Reference            |
| <b>Childhood Trauma</b>             |                      |                      |                      |                      |                      |                      |                      |                      |                      |
| None                                |                      |                      | Reference            |                      |                      |                      |                      |                      | Reference            |
| 1                                   |                      |                      | 0.95 (0.66-1.37)     |                      |                      |                      |                      |                      | 0.90 (0.60-1.33)     |
| 2+                                  |                      |                      | 1.34 (1.00-1.79)     |                      |                      |                      |                      |                      | 1.09 (0.79-1.51)     |
| <b>Recent Marital Status Change</b> |                      |                      |                      |                      |                      |                      |                      |                      |                      |
| Yes                                 |                      |                      |                      | 1.54 (0.82-2.90)     |                      |                      |                      |                      | 1.28 (0.59-2.75)     |
| No                                  |                      |                      |                      | Reference            |                      |                      |                      |                      | Reference            |
| <b>Recent Unemployment</b>          |                      |                      |                      |                      |                      |                      |                      |                      |                      |
| Yes                                 |                      |                      |                      |                      | 1.00 (0.44-2.30)     |                      |                      |                      | 0.72 (0.29-1.78)     |
| No                                  |                      |                      |                      |                      | Reference            |                      |                      |                      | Reference            |
| <b>Work Stress</b>                  |                      |                      |                      |                      |                      |                      |                      |                      |                      |
| 1 <sup>st</sup> Quartile            |                      |                      |                      |                      |                      | Reference            |                      |                      | Reference            |
| 2 <sup>nd</sup> Quartile            |                      |                      |                      |                      |                      | 0.63 (0.42-0.95)     |                      |                      | 0.61 (0.39-0.95)     |
| 3 <sup>rd</sup> Quartile            |                      |                      |                      |                      |                      | 0.66 (0.45-0.96)     |                      |                      | 0.63 (0.41-0.96)     |
| 4 <sup>th</sup> Quartile            |                      |                      |                      |                      |                      | 0.89 (0.61-1.31)     |                      |                      | 0.81 (0.52-1.27)     |
| <b>Chronic Stress</b>               |                      |                      |                      |                      |                      |                      |                      |                      |                      |
| 1 <sup>st</sup> Quartile            |                      |                      |                      |                      |                      |                      | Reference            |                      | Reference            |
| 2 <sup>nd</sup> Quartile            |                      |                      |                      |                      |                      |                      | 0.91 (0.59-1.40)     |                      | 0.99 (0.63-1.56)     |
| 3 <sup>rd</sup> Quartile            |                      |                      |                      |                      |                      |                      | 1.58 (1.11-2.25)     |                      | 1.64 (1.12-2.41)     |
| 4 <sup>th</sup> Quartile            |                      |                      |                      |                      |                      |                      | 1.76 (1.22-2.53)     |                      | 1.68 (1.08-2.61)     |
| <b>Change in Social Support</b>     |                      |                      |                      |                      |                      |                      |                      |                      |                      |
| Yes                                 |                      |                      |                      |                      |                      |                      |                      | 0.77 (0.54-1.11)     | 0.84 (0.58-1.21)     |
| No                                  |                      |                      |                      |                      |                      |                      |                      | Reference            | Reference            |
| <b>Sex</b>                          |                      |                      |                      |                      |                      |                      |                      |                      |                      |
| Male                                |                      | Reference            |
| Female                              |                      | 2.39 (1.83-3.12)     | 2.34 (1.79-3.08)     | 2.49 (1.90-3.26)     | 2.44 (1.86-3.20)     | 2.28 (1.73-2.99)     | 2.39 (1.83-3.12)     | 2.48 (1.89-3.25)     | 2.32 (1.73-3.11)     |
| <b>Age (continuous)</b>             |                      |                      |                      |                      |                      |                      |                      |                      |                      |
|                                     |                      | 0.98 (0.97-0.99)     | 0.98 (0.97-0.99)     | 0.98 (0.97-0.99)     | 0.98 (0.97-0.99)     | 0.98 (0.97-0.99)     | 0.98 (0.97-0.99)     | 0.98 (0.97-0.99)     | 0.98 (0.97-0.99)     |

Table 3. Adjusted hazard ratios for migraine predicting depression, adjusting for various stressors, age, and sex

|                                 | Model 1<br>(n=7,339) | Model 2<br>(n=7,339) | Model 3<br>(n=6,840) | Model 4<br>(n=7,121) | Model 5<br>(n=7,176) | Model 6<br>(n=7,144) | Model 7<br>(n=7,127) | Model 8<br>(n=7,339) | Model 9<br>(n=6,387) |
|---------------------------------|----------------------|----------------------|----------------------|----------------------|----------------------|----------------------|----------------------|----------------------|----------------------|
| <b>Migraine</b>                 |                      |                      |                      |                      |                      |                      |                      |                      |                      |
| Yes                             | 1.84 (1.38-2.45)     | 1.55 (1.15-2.08)     | 1.43 (1.06-1.92)     | 1.46 (1.08-1.98)     | 1.54 (1.14-2.08)     | 1.51 (1.11-2.05)     | 1.33 (0.98-1.79)     | 1.46 (1.07-1.99)     | 1.19 (0.86-1.66)     |
| No                              | Reference            |
| <b>Childhood Trauma</b>         |                      |                      |                      |                      |                      |                      |                      |                      |                      |
| None                            |                      |                      | Reference            |                      |                      |                      |                      |                      | Reference            |
| 1                               |                      |                      | 1.23 (0.92-1.64)     |                      |                      |                      |                      |                      | 1.14 (0.84-1.55)     |
| 2+                              |                      |                      | 2.36 (1.79-3.12)     |                      |                      |                      |                      |                      | 1.89 (1.38-2.59)     |
| <b>Recent Marital Status</b>    |                      |                      |                      |                      |                      |                      |                      |                      |                      |
| <b>Change</b>                   |                      |                      |                      |                      |                      |                      |                      |                      |                      |
| Yes                             |                      |                      |                      | 0.91 (0.40-2.06)     |                      |                      |                      |                      | 0.78 (0.33-1.84)     |
| No                              |                      |                      |                      | Reference            |                      |                      |                      |                      | Reference            |
| <b>Recent Unemployed</b>        |                      |                      |                      |                      |                      |                      |                      |                      |                      |
| Yes                             |                      |                      |                      |                      | 1.52 (0.93-2.49)     |                      |                      |                      | 1.16 (0.68-1.99)     |
| No                              |                      |                      |                      |                      | Reference            |                      |                      |                      | Reference            |
| <b>Work Stress</b>              |                      |                      |                      |                      |                      |                      |                      |                      |                      |
| 1 <sup>st</sup> Quartile        |                      |                      |                      |                      |                      | Reference            |                      |                      | Reference            |
| 2 <sup>nd</sup> Quartile        |                      |                      |                      |                      |                      | 0.64 (0.48-0.85)     |                      |                      | 0.70 (0.52-0.95)     |
| 3 <sup>rd</sup> Quartile        |                      |                      |                      |                      |                      | 0.69 (0.50-0.94)     |                      |                      | 0.76 (0.55-1.06)     |
| 4 <sup>th</sup> Quartile        |                      |                      |                      |                      |                      | 1.12 (0.84-1.51)     |                      |                      | 1.06 (0.77-1.48)     |
| <b>Chronic Stress</b>           |                      |                      |                      |                      |                      |                      |                      |                      |                      |
| 1 <sup>st</sup> Quartile        |                      |                      |                      |                      |                      |                      | Reference            |                      | Reference            |
| 2 <sup>nd</sup> Quartile        |                      |                      |                      |                      |                      |                      | 1.45 (1.06-2.00)     |                      | 1.47 (1.03-2.08)     |
| 3 <sup>rd</sup> Quartile        |                      |                      |                      |                      |                      |                      | 2.02 (1.50-2.73)     |                      | 1.89 (1.37-2.62)     |
| 4 <sup>th</sup> Quartile        |                      |                      |                      |                      |                      |                      | 2.93 (2.20-3.88)     |                      | 2.49 (1.80-3.44)     |
| <b>Change in Social Support</b> |                      |                      |                      |                      |                      |                      |                      |                      |                      |
| Yes                             |                      |                      |                      |                      |                      |                      |                      | 0.91 (0.69-1.20)     | 0.94 (0.71-1.23)     |
| No                              |                      |                      |                      |                      |                      |                      |                      | Reference            | Reference            |
| <b>Sex</b>                      |                      |                      |                      |                      |                      |                      |                      |                      |                      |
| Male                            |                      | Reference            |
| Female                          |                      | 1.91 (1.52-2.39)     | 1.86 (1.49-2.34)     | 1.94 (1.55-2.44)     | 1.92 (1.53-2.41)     | 1.80 (1.43-2.27)     | 1.89 (1.50-2.37)     | 1.89 (1.50-2.39)     | 1.83 (1.43-2.34)     |
| <b>Age (continuous)</b>         |                      |                      |                      |                      |                      |                      |                      |                      |                      |
|                                 |                      | 0.98 (0.97-0.99)     | 0.98 (0.97-0.99)     | 0.98 (0.97-0.99)     | 0.98 (0.97-0.99)     | 0.98 (0.97-0.99)     | 0.98 (0.97-0.99)     | 0.98 (0.97-0.99)     | 0.98 (0.97-0.99)     |

Figure 1. Flow diagram of sample inclusion and exclusion during study period

1  
2  
3  
4  
5  
6  
7  
8  
9  
10  
11  
12  
13  
14  
15  
16  
17  
18  
19  
20  
21  
22  
23  
24  
25  
26  
27  
28  
29  
30  
31  
32  
33  
34  
35  
36  
37  
38  
39  
40  
41  
42  
43

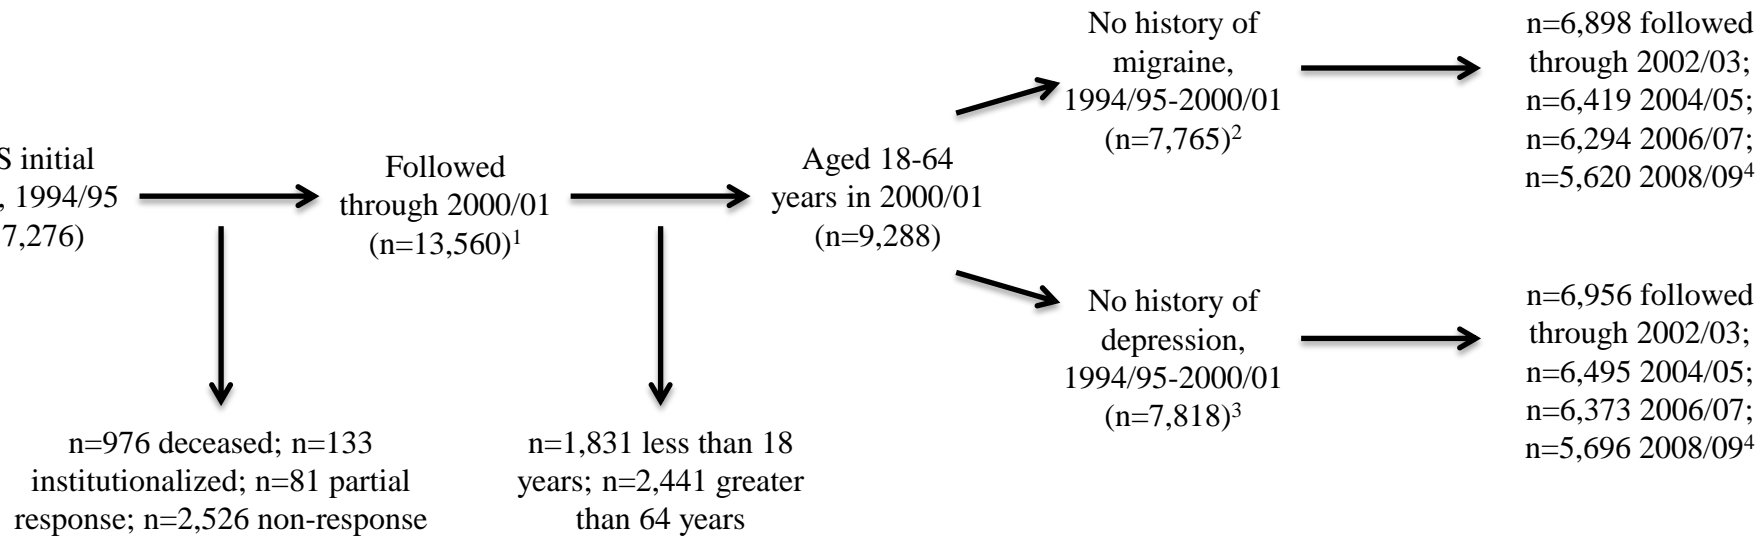

Analyses incorporate weights to account for attrition between 1994/95 and 2000/01 as well as unequal selection probabilities and cluster sampling from the initial study design.

Analyses of depression status in 2000/01 predicting migraine onset are performed on this sub-cohort.

Analyses of migraine status in 2000/01 predicting depression onset are performed on this sub-cohort.

Median follow-up time of participants aged 18-64 years in 2000/01 was 7.30 further years (IQR = 6.29-7.67).



STROBE Statement—Checklist of items that should be included in reports of *cohort studies*

|                              | Check? | Recommendation                                                                                                                                                                                                                                                                                                         |
|------------------------------|--------|------------------------------------------------------------------------------------------------------------------------------------------------------------------------------------------------------------------------------------------------------------------------------------------------------------------------|
| <b>Title and abstract</b>    | x      | (a) Indicate the study's design with a commonly used term in the title or the abstract<br>(b) Provide in the abstract an informative and balanced summary of what was done and what was found                                                                                                                          |
| <b>Introduction</b>          |        |                                                                                                                                                                                                                                                                                                                        |
| Background/rationale         | x      | Explain the scientific background and rationale for the investigation being reported                                                                                                                                                                                                                                   |
| Objectives                   | x      | State specific objectives, including any prespecified hypotheses                                                                                                                                                                                                                                                       |
| <b>Methods</b>               |        |                                                                                                                                                                                                                                                                                                                        |
| Study design                 | x      | Present key elements of study design early in the paper                                                                                                                                                                                                                                                                |
| Setting                      | x      | Describe the setting, locations, and relevant dates, including periods of recruitment, exposure, follow-up, and data collection                                                                                                                                                                                        |
| Participants                 | x      | (a) Give the eligibility criteria, and the sources and methods of selection of participants. Describe methods of follow-up<br>(b) For matched studies, give matching criteria and number of exposed and unexposed                                                                                                      |
| Variables                    | x      | Clearly define all outcomes, exposures, predictors, potential confounders, and effect modifiers. Give diagnostic criteria, if applicable                                                                                                                                                                               |
| Data sources/<br>measurement | x      | For each variable of interest, give sources of data and details of methods of assessment (measurement). Describe comparability of assessment methods if there is more than one group                                                                                                                                   |
| Bias                         | x      | Describe any efforts to address potential sources of bias                                                                                                                                                                                                                                                              |
| Study size                   | x      | Explain how the study size was arrived at                                                                                                                                                                                                                                                                              |
| Quantitative variables       | x      | Explain how quantitative variables were handled in the analyses. If applicable, describe which groupings were chosen and why                                                                                                                                                                                           |
| Statistical methods          | x      | (a) Describe all statistical methods, including those used to control for confounding<br>(b) Describe any methods used to examine subgroups and interactions<br>(c) Explain how missing data were addressed<br>(d) If applicable, explain how loss to follow-up was addressed<br>(e) Describe any sensitivity analyses |
| <b>Results</b>               |        |                                                                                                                                                                                                                                                                                                                        |
| Participants                 | x      | (a) Report numbers of individuals at each stage of study—eg numbers potentially eligible, examined for eligibility, confirmed eligible, included in the study, completing follow-up, and analysed<br>(b) Give reasons for non-participation at each stage<br>(c) Consider use of a flow diagram                        |
| Descriptive data             | x      | (a) Give characteristics of study participants (eg demographic, clinical, social) and information on exposures and potential confounders<br>(b) Indicate number of participants with missing data for each variable of interest<br>(c) Summarise follow-up time (eg, average and total amount)                         |
| Outcome data                 | x      | Report numbers of outcome events or summary measures over                                                                                                                                                                                                                                                              |

1  
2  
3  
4  
5  
6  
7  
8  
9  
10  
11  
12  
13  
14  
15  
16  
17  
18  
19  
20  
21  
22  
23  
24  
25  
26  
27  
28  
29  
30  
31  
32  
33  
34  
35  
36  
37  
38  
39  
40  
41  
42  
43  
44  
45  
46  
47  
48  
49  
50  
51  
52  
53  
54  
55  
56  
57  
58  
59  
60

|                          |   |                                                                                                                                                                                                                                                                                                                                                                                                               |
|--------------------------|---|---------------------------------------------------------------------------------------------------------------------------------------------------------------------------------------------------------------------------------------------------------------------------------------------------------------------------------------------------------------------------------------------------------------|
|                          |   | time                                                                                                                                                                                                                                                                                                                                                                                                          |
| Main results             | x | (a) Give unadjusted estimates and, if applicable, confounder-adjusted estimates and their precision (eg, 95% confidence interval). Make clear which confounders were adjusted for and why they were included<br>(b) Report category boundaries when continuous variables were categorized<br>(c) If relevant, consider translating estimates of relative risk into absolute risk for a meaningful time period |
| Other analyses           | x | Report other analyses done—eg analyses of subgroups and interactions, and sensitivity analyses                                                                                                                                                                                                                                                                                                                |
| <b>Discussion</b>        |   |                                                                                                                                                                                                                                                                                                                                                                                                               |
| Key results              | x | Summarise key results with reference to study objectives                                                                                                                                                                                                                                                                                                                                                      |
| Limitations              | x | Discuss limitations of the study, taking into account sources of potential bias or imprecision. Discuss both direction and magnitude of any potential bias                                                                                                                                                                                                                                                    |
| Interpretation           | x | Give a cautious overall interpretation of results considering objectives, limitations, multiplicity of analyses, results from similar studies, and other relevant evidence                                                                                                                                                                                                                                    |
| Generalisability         | x | Discuss the generalisability (external validity) of the study results                                                                                                                                                                                                                                                                                                                                         |
| <b>Other information</b> |   |                                                                                                                                                                                                                                                                                                                                                                                                               |
| Funding                  | x | Give the source of funding and the role of the funders for the present study and, if applicable, for the original study on which the present article is based                                                                                                                                                                                                                                                 |

Number of References: 40

Abstract Word Count: 188

Main Text Word Count: 2,628

Tables: 3

Figures: 1

**The Contribution of Stress to the Comorbidity of Migraine and Major Depression:  
Results from a Prospective Cohort Study**

Sonja A. Swanson<sup>1</sup>, Yiye Zeng<sup>2</sup>, [Murray Weeks](#)<sup>3</sup>, Ian Colman<sup>2,3</sup>

<sup>1</sup> Department of Epidemiology, Harvard School of Public Health, Boston, MA, USA

<sup>2</sup> School of Public Health, University of Alberta, Edmonton, AB, Canada

<sup>3</sup> Department of Epidemiology and Community Medicine, University of Ottawa, Ottawa, ON, Canada

Corresponding Author: Dr. Ian Colman, Assistant Professor, Department of  
Epidemiology and Community Medicine, University of Ottawa, 451 Smyth Road, Room  
3230C, Ottawa, ON, K1H 8M5, CANADA

Email: [icolman@uottawa.ca](mailto:icolman@uottawa.ca) Tel: +1 613 562 5800 ext. 8715

Keywords: migraine, major depression, stress, trauma

## Abstract

**Objectives:** To estimate the comorbidity of migraine and major depression, and to assess how much this association may be explained by various measures of stress, including prior and current forms of stress.

**Design:** National Population Health Survey is a prospective cohort study representative of the Canadian population. Eight years of follow-up time were used in the present analyses.

**Setting:** Canadian adult population ages 18-64

**Participants:** 9,288 participants

**Outcome:** Incident migraine and major depression

**Results:** Adjusting for sex and age, depression was predictive of incident migraine (HR: 1.62; 95% CI: 1.03-2.53) and migraine was predictive of incident depression (HR: 1.55; 95% CI: 1.15-2.08). However, adjusting for each stressor we operationalized (childhood trauma, recent marital problems, recent unemployment, recent household financial problems, work stress, chronic stress, and change in social support) decreased this association, with chronic stress being a particularly strong covariate. After further adjusting for all stressors, both effects were largely attenuated and no longer significant (depression-migraine HR: 1.30; 95% CI: 0.80-2.10; migraine-depression HR: 1.19; 95% CI: 0.86-1.66).

**Conclusions:** While there appears to be temporal bidirectionality in the migraine-depression comorbidity, much of the apparent association is explained by stress.

## ARTICLE SUMMARY

### Article Focus

- To understand how much and what kinds of stressors play a role in explaining the comorbidity seen between migraine and major depression

### Key Messages

- Migraine headache and major depression each predict the other prospectively
- Stress, particularly chronic stress, appears to explain much of the association seen between migraine and major depression

### Strengths and Limitations

- Large, representative, prospective cohort study
- Migraine was self-reported with only a single question

## INTRODUCTION

Several studies support that migraine and psychopathologies, in particular major depression, often co-occur.<sup>[1-15]</sup> In a recent review of such comorbidities, Antonaci et al reported a meta-analysis of 12 studies, concluding that the odds ratio may be near 2.2 for major depression and migraine.<sup>[16]</sup> A limited number of prospective studies have examined the temporality of this association, largely concluding the predictive relationship is bidirectional (i.e., migraine status predicts depression onset and vice versa).<sup>[1, 2, 10]</sup> While the correlation has been well established, the mechanisms for this co-occurrence are less clear; causal paths may exist from one disorder to the other, and/or some shared common risk factor(s) (i.e., confounders) may cause both depression and migraine.

Migraine and depression indeed share several risk factors, and thus any perceived correlation between the two could potentially be due to this confounding. Prior research assessing their association has adjusted primarily for demographic variables, however some studies have separately studied other risk factors of a genetic and neurobiologic nature. Few studies, however, have focused on stress, a known risk factor for both migraine and depression. In Modgill and colleagues' analyses of the National Population Health Survey (NPHS), a representative longitudinal study of the Canadian population, childhood trauma attenuated the association between the two disorders, particularly for the direction of depression predicting migraine onset.<sup>[10]</sup> However, their analyses only looked at a limited number of stressors and did not attempt to address specifically how much different types of stressors may contribute to this association. A variety of stressors may confound the migraine-depression association, as many types have been found to be

1  
2  
3 risk factors for both disorders: e.g., childhood trauma,<sup>[10, 17]</sup> unemployment,<sup>[18, 19]</sup>  
4  
5 chronic/repeated stress,<sup>[20, 21]</sup> etc.  
6  
7

8  
9 In the current study, we extend upon Modgill et al's findings in the NPHS to  
10  
11 assess how much the association between migraine and depression may be explained by  
12  
13 various measures of stress, including a wide variety of prior and current stressors. We  
14  
15 assess this association longitudinally and bidirectionally.  
16  
17  
18  
19  
20  
21  
22  
23  
24  
25  
26  
27  
28  
29  
30  
31  
32  
33  
34  
35  
36  
37  
38  
39  
40  
41  
42  
43  
44  
45  
46  
47  
48  
49  
50  
51  
52  
53  
54  
55  
56  
57  
58  
59  
60

## METHODS

### *Sample*

The NPHS is a prospective, nationally representative study conducted by Statistics Canada that has followed a Canadian cohort since 1994/95. At study inception, individuals were randomly selected using a stratified two-stage sample design (n=17,276). The sample has been contacted every two years, with the most recent data collection in 2008/09.

For the purposes of this study, we restricted our sample to individuals aged 18 to 64 years in Cycle 4 (2000/01), with this assessment treated as “baseline” in the presented analyses. This serves two purposes: (1) as both migraine and depression assessments reflect current states rather than diagnostic histories, this allows us to use the first three assessments to construct a several-year history of each disorder prior to baseline; and (2) as some of the stressors were not assessed until this time (e.g., work stress, chronic stress) or could not be constructed without at least two assessments (e.g., change in social support, marital status, or employment), this allows a more complete analysis of the role of stressors in the migraine-depression comorbidity. Further information on our analytic sample is depicted in Figure 1.

### *Depression*

Major depressive episodes are assessed using the Composite International Diagnostic Interview Short Form for Major Depression (CIDI-SFMD) at all eight cycles. The CIDI-SFMD inquires about symptoms of major depression, as defined by the



1  
2  
3 Diagnostic and Statistical Manual of Mental Disorders IV (DSM-IV), during the  
4  
5 preceding 12 months. Kessler and colleagues<sup>[22]</sup> showed that the CIDI-SF has 93%  
6  
7 classification accuracy for major depressive episode when compared with the full-length  
8  
9 CIDI. Individuals who endorse five or more symptoms during a single two-week period  
10  
11 are considered to have a 90% probability of having major depression,<sup>[22]</sup> for the purposes  
12  
13 of this study, such individuals will be considered as having major depression in that year.  
14  
15

### 16 17 18 *Migraine*

19  
20  
21 Migraine is assessed in a single diagnostic question at each assessment. In the first  
22  
23 three assessments (1994/95; 1996/97; 1998/99), subjects were asked whether they  
24  
25 currently were having migraine headaches that had been diagnosed by a health  
26  
27 professional. In the subsequent five assessments (2000/01; 2002/03; 2004/05; 2006/07;  
28  
29 2008/09), subjects were asked whether they currently have migraine headaches. In these  
30  
31 last five assessments, subjects were further asked about the timing of onset of the  
32  
33 diagnosis.  
34  
35

### 36 37 38 *Stressors*

39  
40  
41 Using similar definitions as previous studies using NPHS data,<sup>[17]</sup> we defined  
42  
43 several types of stressors: childhood trauma, recent marital problems, recent  
44  
45 unemployment, recent household financial problems, work stress, chronic stress, and  
46  
47 change in social support. Childhood trauma was assessed in Cycle 1 (1994/95) for those  
48  
49 18 or older at that time, and in Cycle 4 (2000/01) for the rest of our cohort. Subjects were  
50  
51 asked about seven items of childhood trauma occurring prior to the individual turning 18:  
52  
53 parental divorce, a lengthy hospital stay, prolonged parental unemployment, frequent  
54  
55 parental alcohol or drug use and physical abuse. Childhood trauma was categorized as  
56  
57  
58  
59  
60

1  
2  
3 none, one event, and two or more events. Three recent stressful life changes were  
4 defined: marital problems, recent unemployment, and household financial problems.  
5  
6 Marital problems were defined by a change from reporting single, married, or partnered  
7 in Cycle 3 (1998/99) to divorced, widowed, or separated in Cycle 4 (2000/01). Recent  
8 unemployment was defined as being employed in Cycle 3 (1998/99) but reporting  
9 unemployment or not being in the labor force in Cycle 4 (2000/01). Household financial  
10 problems were defined as having a score above Statistic Canada's low income cut-off  
11 (LICO) in Cycle 3 (1998/99) followed by a score below the cut-off in Cycle 4 (2000/01).  
12 The LICO score takes into account the individual's income relative to the community in  
13 which an individual lives and the size of their household.<sup>[23, 24]</sup> Work stress was measured  
14 in Cycle 4 (2000/01) by 13 questions that assessed job security, autonomy, conflict and  
15 satisfaction,<sup>[24]</sup> the score was categorized by quartiles. Chronic stress was measured in  
16 Cycle 4 (2000/01) by 18 questions that assessed stress in one's personal life, focusing  
17 primarily on relationships and family strife;<sup>[24]</sup> this score was also broken into quartiles.

18  
19  
20  
21  
22  
23  
24  
25  
26  
27  
28  
29  
30  
31  
32  
33  
34  
35  
36  
37 Social support was measured by a 4-question scale in Cycles 3 and 4 (1998/99;  
38 2000/01);<sup>[24]</sup> this score was dichotomized at the median, and change in social support was  
39 conceptualized as a change from high to low social support.

#### 40 41 42 43 44 *Statistical Analyses*

45  
46  
47 We performed two sets of analyses. First, among those with no history of major  
48 depression (unweighted n=7,818), we assessed the onset of incident major depression  
49 comparing those with and without migraine at baseline; second, among those with no  
50 history of migraine (unweighted n=7,765), we assessed the onset of incident migraine  
51 comparing those with and without major depression at baseline. Cox Proportional  
52  
53  
54  
55  
56  
57  
58  
59  
60

1  
2  
3 Hazards Models were fit, and hazards ratios (HR) and their 95% confidence intervals (CI)  
4 are presented. Models are presented as unadjusted; adjusting for sex and age; adjusting  
5 for sex, age, and each stress exposure individually; and adjusting for sex, age, and all  
6 stress exposures. Data analyses were completed using SAS 9.2 and SUDAAN 10.0.1. All  
7 estimates were weighted to adjust for unequal selection probabilities and cluster  
8 sampling; weights further adjust for attrition between the first and fourth cycle. Standard  
9 errors were calculated using the bootstrap method.  
10  
11  
12  
13  
14  
15  
16  
17  
18  
19  
20  
21  
22  
23  
24  
25  
26  
27  
28  
29  
30  
31  
32  
33  
34  
35  
36  
37  
38  
39  
40  
41  
42  
43  
44  
45  
46  
47  
48  
49  
50  
51  
52  
53  
54  
55  
56  
57  
58  
59  
60

## RESULTS

Demographic information is presented in **Table 1**. At baseline, 4.13, 9.13, and 1.33% of the sample reported current depression only, migraine only, and comorbid depression and migraine, respectively.

Models for depression status predicting incident migraine are presented in **Table 2**. Among non-migraineurs in Cycle 4 (2000/01), 5.52% developed migraine during the eight-year follow-up. The sex- and age-adjusted model suggested depression was predictive of incident migraine (HR: 1.62; 95% CI: 1.03-2.53). When adjusting further for stressors in separate models, estimates were further attenuated; adjusting for chronic stress attenuated the estimate the most (HR: 1.34; 95% CI: 0.84-2.13). When adjusting for all forms of stressors simultaneously, the depression-migraine estimate was attenuated by 19.75% (HR: 1.30; 95% CI: 0.80-2.10).

Models for migraine status predicting incident depression are presented in **Table 3**. Among subjects who had not had a depression up through Cycle 4 (2000/01), 8.72% developed incident depression. Migraine status was predictive of incident depression in the age- and sex-adjusted model (HR: 1.55; 95% CI: 1.15-2.08). Adjusting for stressors in separate models attenuated this relationship, with adjustment for chronic stress affecting the estimate the most (HR: 1.33; 95% CI: 0.98-1.79). The fully adjusted model estimate was attenuated by 23.23%, estimating a migraine-depression HR of 1.19 (95% CI: 0.86-1.66).

## DISCUSSION

Without considering common causes or other explanations, these results align with earlier findings supporting a bidirectionality to a migraine-depression association: in crude analyses, migraine status predicted incident depression, and depression status predicted incident migraine. However, both directions of this relationship are largely explained by stressors that likely increase risk for both migraine and depression: adjusting for all measured forms of stress in these surveys attenuated the each estimate by about 20% and the associations were no longer significant after adjustment. Implications for research as well as clinical and public health practice are discussed.

Importantly, all stressors studied here did attenuate the results, suggesting that any form of stress may be an important common cause to consider when studying migraine and depression. This finding follows from prior research that supports both acute and chronic forms of stress as being confounders, since these have been shown to predict depression and migraine.<sup>[10, 17-21]</sup> The present study suggests that prior studies that these stressors collectively explain much of the perceived migraine-depression association; research that does not account for these common causes when studying depression and migraine may be presenting misleading estimates.

While all types of stressors did attenuate the results, the strongest risk factor in both sets of models was chronic stress. This fits into a broader context of research suggesting that chronic stress may be causative of various types of chronic pain and major depression. In disentangling the relationship between depression, chronic stress, and chronic pain such as fibromyalgia, its been proposed that chronic stress may lead to dysfunction in the hypothalamic-pituitary-adrenal axis, which in turn could lead to both

1  
2  
3 depression and some forms of chronic pain.<sup>[25]</sup> Research specific to stress and migraine  
4 supports this biological theory.<sup>[26]</sup> Notably, childhood trauma was a strong risk factor in  
5 migraine predicting depression; as many of the types of trauma assessed were chronic in  
6 nature, this aligns with the finding that perhaps chronic forms of stress are especially  
7 potent common causes of migraine and depression.  
8  
9  
10  
11  
12  
13

14  
15 Although certainly some of the crude association between depression and  
16 migraine may still be explained by genetics, other common causes, and/or biological  
17 pathways between the two disorders, the current findings suggest interesting  
18 considerations when developing future intervention strategies. Given the possibility of a  
19 biological mechanism between these two disorders, much research attention has been  
20 focused on the efficacy of antidepressant medications on preventing and managing  
21 migraine, with mixed success.<sup>[27-29]</sup> However, the current study suggests that perhaps a  
22 primary strategy could target reducing stress, particularly chronic stress, as this may both  
23 reduce the burden of the index disorder as well as potentially prevent the second  
24 condition from occurring. Indeed, there have been studies showing that various  
25 behavioural or stress management therapies (e.g., Cognitive-Behavioral Therapy) are  
26 effective treatments for migraine, supporting one aspect of this hypothesis.<sup>[30-32]</sup> Given  
27 how much chronic stress and other stressors seem to explain the comorbidity, such a  
28 strategy may have the potential for reducing this comorbidity burden on a larger scale  
29 than some of these other postulated pharmacological strategies, although further research  
30 actually comparing such treatment strategies would be needed. Utilizing a stress-reducing  
31 strategy to address this comorbidity assumes that stress is (directly or indirectly)  
32  
33  
34  
35  
36  
37  
38  
39  
40  
41  
42  
43  
44  
45  
46  
47  
48  
49  
50  
51  
52  
53  
54  
55  
56  
57  
58  
59  
60

1  
2  
3 causative of both disorders, while it is possible that stress is a risk factor through  
4  
5 associations with a common cause.  
6  
7

8  
9 The study has numerous strengths. This is one of only a few studies to  
10 prospectively assess the migraine-depression comorbidity bidirectionally,<sup>[1, 2, 10]</sup> and  
11 extends these previous findings by examining whether a rich assortment of widely-used  
12 stress measures explained the associations found. The nationally-representative nature of  
13 the study aids the generalizability of these findings, and the sample size and length of  
14 follow-up are exceptional.  
15  
16  
17  
18  
19  
20  
21

22  
23 However, certain limitations warrant consideration. Migraine was assessed as  
24 only a single, self-reported question at each cycle. Self-reported symptom-based  
25 assessments do generally report a higher prevalence than doctor diagnoses;<sup>[33]</sup> the  
26 assessment in the NPHS inquires about diagnosis by a health professional which may  
27 offset some of this over-reporting, but certainly misclassification may still be an issue.  
28 Specifically, self-report may be further inflated in depressed individuals, which may  
29 actually contribute to some overestimation in our associations. While the measure of  
30 major depression (CIDI-SFMD) has demonstrated psychometric properties,<sup>[22, 34, 35]</sup> the  
31 12-month diagnosis (which thus does not cover the 2 years between each study  
32 assessment) hinders inference about history of major depression, possible episodes  
33 unmeasured in the gap years of the study, and actual timing of onset of the disorder;  
34 subjects who have less frequent depressive episodes or episodes that are shorter in  
35 duration would be less likely to be measured accurately. However, by using an interim  
36 cycle as “baseline”, we were able to construct over a half-decade profile of subjects’  
37 “history” of major depression to diminish the issue regarding assessing history. Finally,  
38  
39  
40  
41  
42  
43  
44  
45  
46  
47  
48  
49  
50  
51  
52  
53  
54  
55  
56  
57  
58  
59  
60

1  
2  
3  
4  
5  
6  
7  
8  
9  
10  
11  
12  
13  
14  
15  
16  
17  
18  
19  
20  
21  
22  
23  
24  
25  
26  
27  
28  
29  
30  
31  
32  
33  
34  
35  
36  
37  
38  
39  
40  
41  
42  
43  
44  
45  
46  
47  
48  
49  
50  
51  
52  
53  
54  
55  
56  
57  
58  
59  
60

we did not have complete follow-up for all subjects. Weighting was used to correct for attrition between Cycles 1 and 4. From Cycle 4 through 8 the majority of subjects were assessed eight years later (see Figure 1), and follow-up duration was not associated with migraine or depression status at baseline. Follow-up duration, however, was associated with age and a few stressors (greater chronic stress, recent unemployment, and recent divorce were associated with shorter follow-up;  $p$ 's<0.05); however, as stress likely predicts higher levels of the outcome disorders, its likely this implies that some subjects were censored prior to onset of the outcome, meaning that stress would explain even more of the association measured had complete follow-up occurred.

These analyses highlight considerations for future research. These analyses represent a rich assortment of stressors, but several other stressors may also merit examination, e.g., childhood sexual abuse, acute recent traumas such as injury or illness, etc. Further, as some of the stressors were only assessed in one or two cycles, we were not able to fully address the time-varying nature of the relationships between stress and these episodic conditions. Given that we found recent and prior stress to be relevant in this comorbidity, future research may wish to more closely examine the time-varying relationship between stress and these two conditions individually and comorbidly. Specifically, while stress is a risk factor for both disorders, it may also be caused by each disorder, and thus assessing temporal relationships using models that account for time-varying confounding appropriately (e.g., marginal structural models), may highlight the relationship between these variables further.

Understanding the causal mechanisms underlying the migraine-depression comorbidity may have a major public health impact. Major depression is a chief cause of



1  
2  
3 disability worldwide,<sup>[36]</sup> estimated by the World Health Organization to become the  
4  
5 second leading cause of disease burden by the year 2020.<sup>[37]</sup> Meanwhile, migraine affects  
6  
7 11% of the adult population, and when combined with other headache disorders also  
8  
9 makes it into the top ten causes of disability by World Health Organization estimates.<sup>[38]</sup>  
10  
11

12 Moreover, studies suggest that the disability and burden of these disorders may be  
13 compounded when present together;<sup>[5]</sup> disease severity appears greater when these  
14 disorders are comorbid, e.g., frequency and duration of migraine attacks have a  
15 significant association with psychiatric comorbidity.<sup>[39]</sup> Migraine patients with a  
16  
17 psychiatric disorder report generally lower quality of life than other migraine patients;<sup>[8]</sup>  
18  
19 in parallel, depression patients who report migraine also report poorer quality of life  
20  
21 compared to other depression patients.<sup>[40]</sup> As such, implementation of effective stress-  
22  
23 management strategies for migraineurs and those suffering from depression (as well as  
24  
25 similar strategies to prevent the index disorder onset) may have major implications for  
26  
27 prevention and intervention strategies that may lower the societal costs and burdens of  
28  
29 both disorders.  
30  
31  
32  
33  
34  
35  
36  
37  
38  
39  
40  
41  
42  
43  
44  
45  
46  
47  
48  
49  
50  
51  
52  
53  
54  
55  
56  
57  
58  
59  
60

## REFERENCES

1. Breslau N, Lipton RB, Stewart WF, Schultz LR, Welch KM. Comorbidity of migraine and depression: investigating potential etiology and prognosis. *Neurology*. 2003 Apr 22;60(8):1308-12.
2. Breslau N, Schultz LR, Stewart WF, Lipton RB, Lucia VC, Welch KM. Headache and major depression: is the association specific to migraine? *Neurology*. 2000 Jan 25;54(2):308-13.
3. Camarda C, Pipia C, Tagliavori A, Di Fiore P, Camarda R, Monastero R. Comorbidity between depressive symptoms and migraine: preliminary data from the Zabut Aging Project. *Neurol Sci*. 2008 May;29 Suppl 1:S149-51.
4. Hung CI, Liu CY, Cheng YT, Wang SJ. Migraine: a missing link between somatic symptoms and major depressive disorder. *J Affect Disord*. 2009 Sep;117(1-2):108-15.
5. Jette N, Patten S, Williams J, Becker W, Wiebe S. Comorbidity of migraine and psychiatric disorders--a national population-based study. *Headache*. 2008 Apr;48(4):501-16.
6. Kececi H, Dener S, Analan E. Co-morbidity of migraine and major depression in the Turkish population. *Cephalalgia*. 2003 May;23(4):271-5.
7. Lanteri-Minet M, Valade D, Geraud G, Chautard MH, Lucas C. Migraine and probable migraine--results of FRAMIG 3, a French nationwide survey carried out according to the 2004 IHS classification. *Cephalalgia*. 2005 Dec;25(12):1146-58.
8. Lipton RB, Hamelsky SW, Kolodner KB, Steiner TJ, Stewart WF. Migraine, quality of life, and depression: a population-based case-control study. *Neurology*. 2000 Sep 12;55(5):629-35.
9. McWilliams LA, Goodwin RD, Cox BJ. Depression and anxiety associated with three pain conditions: results from a nationally representative sample. *Pain*. 2004 Sep;111(1-2):77-83.
10. Modgill G, Jette N, Wang JL, Becker WJ, Patten SB. A population-based longitudinal community study of major depression and migraine. *Headache*. [Research Support, Non-U.S. Gov't]. 2012 Mar;52(3):422-32.
11. Molgat CV, Patten SB. Comorbidity of major depression and migraine--a Canadian population-based study. *Can J Psychiatry*. [Research Support, Non-U.S. Gov't]. 2005 Nov;50(13):832-7.
12. Ratcliffe GE, Enns MW, Jacobi F, Belik SL, Sareen J. The relationship between migraine and mental disorders in a population-based sample. *Gen Hosp Psychiatry*. 2009 Jan-Feb;31(1):14-9.
13. Rhee H. Prevalence and predictors of headaches in US adolescents. *Headache*. 2000 Jul-Aug;40(7):528-38.
14. Samaan Z, Farmer A, Craddock N, Jones L, Korszun A, Owen M, et al. Migraine in recurrent depression: case-control study. *Br J Psychiatry*. 2009 Apr;194(4):350-4.
15. Wang SJ, Liu HC, Fuh JL, Liu CY, Wang PN, Lu SR. Comorbidity of headaches and depression in the elderly. *Pain*. 1999 Sep;82(3):239-43.
16. Antonaci F, Nappi G, Galli F, Manzoni GC, Calabresi P, Costa A. Migraine and psychiatric comorbidity: a review of clinical findings. *J Headache Pain*. Jan 6.

- 1  
2  
3  
4  
5  
6  
7  
8  
9  
10  
11  
12  
13  
14  
15  
16  
17  
18  
19  
20  
21  
22  
23  
24  
25  
26  
27  
28  
29  
30  
31  
32  
33  
34  
35  
36  
37  
38  
39  
40  
41  
42  
43  
44  
45  
46  
47  
48  
49  
50  
51  
52  
53  
54  
55  
56  
57  
58  
59  
60
17. Colman I, Garad Y, Zeng Y, Naicker K, Weeks M, Patten SB, et al. Stress and development of depression and heavy drinking in adulthood: moderating effects of childhood trauma. *Soc Psychiatry Psychiatr Epidemiol*. 2012 Jun 9.
18. Le H, Tfelt-Hansen P, Skytthe A, Kyvik KO, Olesen J. Association between migraine, lifestyle and socioeconomic factors: a population-based cross-sectional study. *The journal of headache and pain*. [Twin Study]. 2011 Apr;12(2):157-72.
19. Gili M, Roca M, Basu S, McKee M, Stuckler D. The mental health risks of economic crisis in Spain: evidence from primary care centres, 2006 and 2010. *Eur J Public Health*. 2012 Apr 19.
20. Maleki N, Becerra L, Borsook D. Migraine: maladaptive brain responses to stress. *Headache*. 2012 Oct;52 Suppl 2:102-6.
21. Risch N, Herrell R, Lehner T, Liang KY, Eaves L, Hoh J, et al. Interaction between the serotonin transporter gene (5-HTTLPR), stressful life events, and risk of depression: a meta-analysis. *Jama*. [Meta-Analysis
- Research Support, N.I.H., Extramural
- Research Support, N.I.H., Intramural]. 2009 Jun 17;301(23):2462-71.
22. Kessler RC, Andrews G, Mroczek DK, Ustun B, Wittchen HU. The World Health Organization Composite International Diagnostic Interview short-form (CIDI-SF). *Int J Methods Psychiatr Res*. 1998;7(5):171-85.
23. Cotton C. Recent developments in the low income cut offs. Ottawa: Statistics Canada; 2001.
24. Statistics Canada. National Population Health Survey Cycle 1 (1994-1995). Public use microdata files documentation. Ottawa 1995.
25. Blackburn-Munro G. Hypothalamo-pituitary-adrenal axis dysfunction as a contributory factor to chronic pain and depression. *Curr Pain Headache Rep*. [Review]. 2004 Apr;8(2):116-24.
26. Sauro KM, Becker WJ. The stress and migraine interaction. *Headache*. [Review]. 2009 Oct;49(9):1378-86.
27. Adelman LC, Adelman JU, Von Seggern R, Mannix LK. Venlafaxine extended release (XR) for the prophylaxis of migraine and tension-type headache: A retrospective study in a clinical setting. *Headache*. [Clinical Trial
- Research Support, Non-U.S. Gov't]. 2000 Jul-Aug;40(7):572-80.
28. Sheftell FD, Atlas SJ. Migraine and psychiatric comorbidity: from theory and hypotheses to clinical application. *Headache*. 2002 Oct;42(9):934-44.
29. Silberstein SD, Goadsby PJ. Migraine: preventive treatment. *Cephalalgia : an international journal of headache*. [Review]. 2002 Sep;22(7):491-512.
30. Martin PR, Forsyth MR, Reece J. Cognitive-behavioral therapy versus temporal pulse amplitude biofeedback training for recurrent headache. *Behav Ther*. [Randomized Controlled Trial]. 2007 Dec;38(4):350-63.
31. Penzien DB. Stress management for migraine: recent research and commentary. *Headache*. [Review]. 2009 Oct;49(9):1395-8.
32. Rains JC, Penzien DB, McCrory DC, Gray RN. Behavioral headache treatment: history, review of the empirical literature, and methodological critique. *Headache*. [Review]. 2005 May;45 Suppl 2:S92-109.

- 1  
2  
3  
4  
5  
6  
7  
8  
9  
10  
11  
12  
13  
14  
15  
16  
17  
18  
19  
20  
21  
22  
23  
24  
25  
26  
27  
28  
29  
30  
31  
32  
33  
34  
35  
36  
37  
38  
39  
40  
41  
42  
43  
44  
45  
46  
47  
48  
49  
50  
51  
52  
53  
54  
55  
56  
57  
58  
59  
60
33. Cousins G, Hijazze S, Van de Laar FA, Fahey T. Diagnostic accuracy of the ID Migraine: a systematic review and meta-analysis. *Headache*. [Meta-Analysis Research Support, Non-U.S. Gov't Review]. 2011 Jul-Aug;51(7):1140-8.
34. Patten SB. Performance of the Composite International Diagnostic Interview Short Form for major depression in community and clinical samples. *Chronic Dis Can*. [Comparative Study]. 1997;18(3):109-12.
35. Patten SB, Brandon-Christie J, Devji J, Sedmak B. Performance of the composite international diagnostic interview short form for major depression in a community sample. *Chronic Dis Can*. 2000;21(2):68-72.
36. Ustun TB, Kessler RC. Global burden of depressive disorders: the issue of duration. *Br J Psychiatry*. 2002 Sep;181:181-3.
37. Simon GE. Social and economic burden of mood disorders. *Biol Psychiatry*. 2003 Aug 1;54(3):208-15.
38. Stovner L, Hagen K, Jensen R, Katsarava Z, Lipton R, Scher A, et al. The global burden of headache: a documentation of headache prevalence and disability worldwide. *Cephalalgia*. 2007 Mar;27(3):193-210.
39. Mitsikostas DD, Thomas AM. Comorbidity of headache and depressive disorders. *Cephalalgia*. 1999 May;19(4):211-7.
40. Hung CI, Wang SJ, Hsu KH, Juang YY, Liu CY. Risk factors associated with migraine or chronic daily headache in out-patients with major depressive disorder. *Acta Psychiatr Scand*. 2005 Apr;111(4):310-5.

## ACKNOWLEDGMENTS

The authors would like to thank Ms. Irene Wong of Statistics Canada for her assistance with data access and use. The research and analysis are based on data from Statistics Canada and the opinions expressed do not represent the views of Statistics Canada.

## FUNDING

This research was undertaken, in part, thanks to funding from the Canada Research Chairs program for Dr. Colman. Funders had no role in study design, data collection and analysis, decision to publish, or preparation of the manuscript.

## COMPETING INTERESTS

None declared

## AUTHOR CONTRIBUTIONS

SS and IC conceived and designed the study and interpreted the results. SS, YZ and MWYZ performed the data analysis. SS wrote the manuscript. All authors critically reviewed the manuscript.

1  
2  
3  
4  
5  
6  
7  
8  
9  
10  
11  
12  
13  
14  
15  
16  
17  
18  
19  
20  
21  
22  
23  
24  
25  
26  
27  
28  
29  
30  
31  
32  
33  
34  
35  
36  
37  
38  
39  
40  
41  
42  
43  
44  
45  
46  
47  
48  
49

Table 1. Sample Characteristics Ages 18-64, % (SE)

| Variable                                                        | Unweighted N | % (SE)        |
|-----------------------------------------------------------------|--------------|---------------|
| <b>N</b>                                                        | 9,342        |               |
| <b>Sex</b>                                                      |              |               |
| Male                                                            | 4,986        | 50.31 (0.17)  |
| Female                                                          | 4,356        | 49.69 (0.17)  |
| <b>Age, mean (range)</b>                                        |              | 40.77 (18-64) |
| <b>Baseline Migraine/Depression Comorbidity</b>                 |              |               |
| None                                                            | 7,619        | 85.41 (0.49)  |
| Depression Only                                                 | 404          | 4.13 (0.29)   |
| Migraine Only                                                   | 839          | 9.13 (0.40)   |
| Depression and Migraine                                         | 124          | 1.33 (0.17)   |
| <b>Childhood Trauma</b>                                         |              |               |
| 0                                                               | 4,194        | 49.61 (0.74)  |
| 1                                                               | 2,265        | 25.82 (0.64)  |
| 2+                                                              | 2,274        | 24.57 (0.65)  |
| <b>Recent Marital Change to Divorced, Separated, or Widowed</b> |              |               |
| Yes                                                             | 214          | 2.47 (0.23)   |
| No                                                              | 8,781        | 97.53 (0.23)  |
| <b>Recent Unemployment</b>                                      |              |               |
| Yes                                                             | 394          | 4.34 (0.32)   |
| No                                                              | 8,670        | 95.66 (0.32)  |
| <b>Recent Change in Social Support</b>                          |              |               |
| Yes                                                             | 1,359        | 16.76 (0.60)  |
| No                                                              | 6,961        | 83.24 (0.60)  |
| <b>Years of Follow-Up</b>                                       |              |               |
| Median                                                          |              | 7.30          |
| IQR                                                             |              | 6.29-7.67     |

For peer review only

Table 2. Adjusted hazard ratios for depression predicting migraine, adjusting for various stressors, age, and sex

|                                     | Model 1<br>(n=7,076) | Model 2<br>(n=7,076) | Model 3<br>(n=6,678) | Model 4<br>(n=6,868) | Model 5<br>(n=6,953) | Model 6<br>(n=7,064) | Model 7<br>(n=7,044) | Model 8<br>(n=7,076) | Model 9<br>(n=6,339) |
|-------------------------------------|----------------------|----------------------|----------------------|----------------------|----------------------|----------------------|----------------------|----------------------|----------------------|
| <b>Depression</b>                   |                      |                      |                      |                      |                      |                      |                      |                      |                      |
| Yes                                 | 1.85 (1.20-2.85)     | 1.62 (1.03-2.53)     | 1.59 (1.03-2.46)     | 1.56 (0.98-2.47)     | 1.61 (1.02-2.53)     | 1.52 (0.97-2.38)     | 1.34 (0.84-2.13)     | 1.61 (1.02-2.54)     | 1.30 (0.80-2.10)     |
| No                                  | Reference            |
| <b>Childhood Trauma</b>             |                      |                      |                      |                      |                      |                      |                      |                      |                      |
| None                                |                      |                      | Reference            |                      |                      |                      |                      |                      | Reference            |
| 1                                   |                      |                      | 0.95 (0.66-1.37)     |                      |                      |                      |                      |                      | 0.90 (0.60-1.33)     |
| 2+                                  |                      |                      | 1.34 (1.00-1.79)     |                      |                      |                      |                      |                      | 1.09 (0.79-1.51)     |
| <b>Recent Marital Status Change</b> |                      |                      |                      |                      |                      |                      |                      |                      |                      |
| Yes                                 |                      |                      |                      | 1.54 (0.82-2.90)     |                      |                      |                      |                      | 1.28 (0.59-2.75)     |
| No                                  |                      |                      |                      | Reference            |                      |                      |                      |                      | Reference            |
| <b>Recent Unemployment</b>          |                      |                      |                      |                      |                      |                      |                      |                      |                      |
| Yes                                 |                      |                      |                      |                      | 1.00 (0.44-2.30)     |                      |                      |                      | 0.72 (0.29-1.78)     |
| No                                  |                      |                      |                      |                      | Reference            |                      |                      |                      | Reference            |
| <b>Work Stress</b>                  |                      |                      |                      |                      |                      |                      |                      |                      |                      |
| 1 <sup>st</sup> Quartile            |                      |                      |                      |                      |                      | Reference            |                      |                      | Reference            |
| 2 <sup>nd</sup> Quartile            |                      |                      |                      |                      |                      | 0.63 (0.42-0.95)     |                      |                      | 0.61 (0.39-0.95)     |
| 3 <sup>rd</sup> Quartile            |                      |                      |                      |                      |                      | 0.66 (0.45-0.96)     |                      |                      | 0.63 (0.41-0.96)     |
| 4 <sup>th</sup> Quartile            |                      |                      |                      |                      |                      | 0.89 (0.61-1.31)     |                      |                      | 0.81 (0.52-1.27)     |
| <b>Chronic Stress</b>               |                      |                      |                      |                      |                      |                      |                      |                      |                      |
| 1 <sup>st</sup> Quartile            |                      |                      |                      |                      |                      |                      | Reference            |                      | Reference            |
| 2 <sup>nd</sup> Quartile            |                      |                      |                      |                      |                      |                      | 0.91 (0.59-1.40)     |                      | 0.99 (0.63-1.56)     |
| 3 <sup>rd</sup> Quartile            |                      |                      |                      |                      |                      |                      | 1.58 (1.11-2.25)     |                      | 1.64 (1.12-2.41)     |
| 4 <sup>th</sup> Quartile            |                      |                      |                      |                      |                      |                      | 1.76 (1.22-2.53)     |                      | 1.68 (1.08-2.61)     |
| <b>Change in Social Support</b>     |                      |                      |                      |                      |                      |                      |                      |                      |                      |
| Yes                                 |                      |                      |                      |                      |                      |                      |                      | 0.77 (0.54-1.11)     | 0.84 (0.58-1.21)     |
| No                                  |                      |                      |                      |                      |                      |                      |                      | Reference            | Reference            |
| <b>Sex</b>                          |                      |                      |                      |                      |                      |                      |                      |                      |                      |
| Male                                |                      | Reference            |
| Female                              |                      | 2.39 (1.83-3.12)     | 2.34 (1.79-3.08)     | 2.49 (1.90-3.26)     | 2.44 (1.86-3.20)     | 2.28 (1.73-2.99)     | 2.39 (1.83-3.12)     | 2.48 (1.89-3.25)     | 2.32 (1.73-3.11)     |
| <b>Age (continuous)</b>             |                      |                      |                      |                      |                      |                      |                      |                      |                      |
|                                     |                      | 0.98 (0.97-0.99)     | 0.98 (0.97-0.99)     | 0.98 (0.97-0.99)     | 0.98 (0.97-0.99)     | 0.98 (0.97-0.99)     | 0.98 (0.97-0.99)     | 0.98 (0.97-0.99)     | 0.98 (0.97-0.99)     |

1  
2  
3  
4  
5  
6  
7  
8  
9  
10  
11  
12  
13  
14  
15  
16  
17  
18  
19  
20  
21  
22  
23  
24  
25  
26  
27  
28  
29  
30  
31  
32  
33  
34  
35  
36  
37  
38  
39  
40  
41  
42  
43  
44  
45  
46  
47  
48  
49

Table 3. Adjusted hazard ratios for migraine predicting depression, adjusting for various stressors, age, and sex

|                                     | Model 1<br>(n=7,339) | Model 2<br>(n=7,339) | Model 3<br>(n=6,840) | Model 4<br>(n=7,121) | Model 5<br>(n=7,176) | Model 6<br>(n=7,144) | Model 7<br>(n=7,127) | Model 8<br>(n=7,339) | Model 9<br>(n=6,387) |
|-------------------------------------|----------------------|----------------------|----------------------|----------------------|----------------------|----------------------|----------------------|----------------------|----------------------|
| <b>Migraine</b>                     |                      |                      |                      |                      |                      |                      |                      |                      |                      |
| Yes                                 | 1.84 (1.38-2.45)     | 1.55 (1.15-2.08)     | 1.43 (1.06-1.92)     | 1.46 (1.08-1.98)     | 1.54 (1.14-2.08)     | 1.51 (1.11-2.05)     | 1.33 (0.98-1.79)     | 1.46 (1.07-1.99)     | 1.19 (0.86-1.66)     |
| No                                  | Reference            |
| <b>Childhood Trauma</b>             |                      |                      |                      |                      |                      |                      |                      |                      |                      |
| None                                |                      |                      | Reference            |                      |                      |                      |                      |                      | Reference            |
| 1                                   |                      |                      | 1.23 (0.92-1.64)     |                      |                      |                      |                      |                      | 1.14 (0.84-1.55)     |
| 2+                                  |                      |                      | 2.36 (1.79-3.12)     |                      |                      |                      |                      |                      | 1.89 (1.38-2.59)     |
| <b>Recent Marital Status Change</b> |                      |                      |                      |                      |                      |                      |                      |                      |                      |
| Yes                                 |                      |                      |                      | 0.91 (0.40-2.06)     |                      |                      |                      |                      | 0.78 (0.33-1.84)     |
| No                                  |                      |                      |                      | Reference            |                      |                      |                      |                      | Reference            |
| <b>Recent Unemployed</b>            |                      |                      |                      |                      |                      |                      |                      |                      |                      |
| Yes                                 |                      |                      |                      |                      | 1.52 (0.93-2.49)     |                      |                      |                      | 1.16 (0.68-1.99)     |
| No                                  |                      |                      |                      |                      | Reference            |                      |                      |                      | Reference            |
| <b>Work Stress</b>                  |                      |                      |                      |                      |                      |                      |                      |                      |                      |
| 1 <sup>st</sup> Quartile            |                      |                      |                      |                      |                      | Reference            |                      |                      | Reference            |
| 2 <sup>nd</sup> Quartile            |                      |                      |                      |                      |                      | 0.64 (0.48-0.85)     |                      |                      | 0.70 (0.52-0.95)     |
| 3 <sup>rd</sup> Quartile            |                      |                      |                      |                      |                      | 0.69 (0.50-0.94)     |                      |                      | 0.76 (0.55-1.06)     |
| 4 <sup>th</sup> Quartile            |                      |                      |                      |                      |                      | 1.12 (0.84-1.51)     |                      |                      | 1.06 (0.77-1.48)     |
| <b>Chronic Stress</b>               |                      |                      |                      |                      |                      |                      |                      |                      |                      |
| 1 <sup>st</sup> Quartile            |                      |                      |                      |                      |                      |                      | Reference            |                      | Reference            |
| 2 <sup>nd</sup> Quartile            |                      |                      |                      |                      |                      |                      | 1.45 (1.06-2.00)     |                      | 1.47 (1.03-2.08)     |
| 3 <sup>rd</sup> Quartile            |                      |                      |                      |                      |                      |                      | 2.02 (1.50-2.73)     |                      | 1.89 (1.37-2.62)     |
| 4 <sup>th</sup> Quartile            |                      |                      |                      |                      |                      |                      | 2.93 (2.20-3.88)     |                      | 2.49 (1.80-3.44)     |
| <b>Change in Social Support</b>     |                      |                      |                      |                      |                      |                      |                      |                      |                      |
| Yes                                 |                      |                      |                      |                      |                      |                      |                      | 0.91 (0.69-1.20)     | 0.94 (0.71-1.23)     |
| No                                  |                      |                      |                      |                      |                      |                      |                      | Reference            | Reference            |
| <b>Sex</b>                          |                      |                      |                      |                      |                      |                      |                      |                      |                      |
| Male                                |                      | Reference            |
| Female                              |                      | 1.91 (1.52-2.39)     | 1.86 (1.49-2.34)     | 1.94 (1.55-2.44)     | 1.92 (1.53-2.41)     | 1.80 (1.43-2.27)     | 1.89 (1.50-2.37)     | 1.89 (1.50-2.39)     | 1.83 (1.43-2.34)     |
| <b>Age (continuous)</b>             |                      |                      |                      |                      |                      |                      |                      |                      |                      |
|                                     |                      | 0.98 (0.97-0.99)     | 0.98 (0.97-0.99)     | 0.98 (0.97-0.99)     | 0.98 (0.97-0.99)     | 0.98 (0.97-0.99)     | 0.98 (0.97-0.99)     | 0.98 (0.97-0.99)     | 0.98 (0.97-0.99)     |



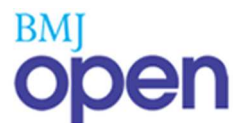

**The Contribution of Stress to the Comorbidity of Migraine and Major Depression: Results from a Prospective Cohort Study**

|                                 |                                                                                                                                                                                                                                                                                                                   |
|---------------------------------|-------------------------------------------------------------------------------------------------------------------------------------------------------------------------------------------------------------------------------------------------------------------------------------------------------------------|
| Journal:                        | <i>BMJ Open</i>                                                                                                                                                                                                                                                                                                   |
| Manuscript ID:                  | bmjopen-2012-002057.R2                                                                                                                                                                                                                                                                                            |
| Article Type:                   | Research                                                                                                                                                                                                                                                                                                          |
| Date Submitted by the Author:   | 30-Jan-2013                                                                                                                                                                                                                                                                                                       |
| Complete List of Authors:       | Swanson, Sonja; Harvard University, Harvard School of Public Health<br>Zeng, Yiye; University of Alberta, School of Public Health<br>Weeks, Murray; University of Ottawa, Department of Epidemiology and Community Medicine<br>Colman, Ian; University of Ottawa, Department of Epidemiology & Community Medicine |
| <b>Primary Subject Heading</b>: | Mental health                                                                                                                                                                                                                                                                                                     |
| Secondary Subject Heading:      | Epidemiology, Neurology                                                                                                                                                                                                                                                                                           |
| Keywords:                       | Migraine < NEUROLOGY, Depression & mood disorders < PSYCHIATRY, EPIDEMIOLOGY                                                                                                                                                                                                                                      |
|                                 |                                                                                                                                                                                                                                                                                                                   |

SCHOLARONE™  
Manuscripts

Number of References: 40

Abstract Word Count: 166

Main Text Word Count: 2,812

Tables: 3

Figures: 1

**The Contribution of Stress to the Comorbidity of Migraine and Major Depression:  
Results from a Prospective Cohort Study**

Sonja A. Swanson<sup>1</sup>, Yiye Zeng<sup>2</sup>, Murray Weeks<sup>3</sup>, Ian Colman<sup>2,3</sup>

<sup>1</sup> Department of Epidemiology, Harvard School of Public Health, Boston, MA, USA

<sup>2</sup> School of Public Health, University of Alberta, Edmonton, AB, Canada

<sup>3</sup> Department of Epidemiology and Community Medicine, University of Ottawa, Ottawa, ON, Canada

Corresponding Author: Dr. Ian Colman, Assistant Professor, Department of Epidemiology and Community Medicine, University of Ottawa, 451 Smyth Road, Room 3230C, Ottawa, ON, K1H 8M5, CANADA

Email: [icolman@uottawa.ca](mailto:icolman@uottawa.ca) Tel: +1 613 562 5800 ext. 8715

Keywords: migraine, major depression, stress, trauma

## Abstract

**Objectives:** To assess how much the association between migraine and depression may be explained by various measures of stress.

**Design:** National Population Health Survey is a prospective cohort study representative of the Canadian population. Eight years of follow-up time were used in the present analyses.

**Setting:** Canadian adult population ages 18-64

**Participants:** 9,288 participants

**Outcome:** Incident migraine and major depression

**Results:** Adjusting for sex and age, depression was predictive of incident migraine (HR: 1.62; 95% CI: 1.03-2.53) and migraine was predictive of incident depression (HR: 1.55; 95% CI: 1.15-2.08). However, adjusting for each assessed stressor (childhood trauma, recent marital problems, recent unemployment, recent household financial problems, work stress, chronic stress, and change in social support) decreased this association, with chronic stress being a particularly strong predictor of outcomes. When adjusting for all stressors simultaneously, both associations were largely attenuated (depression-migraine HR: 1.30; 95% CI: 0.80-2.10; migraine-depression HR: 1.19; 95% CI: 0.86-1.66).

**Conclusions:** Much of the apparent association between migraine and depression may be explained by stress.

## ARTICLE SUMMARY

### Article Focus

- To understand how much and what kinds of stressors play a role in explaining the comorbidity seen between migraine and major depression

### Key Messages

- Migraine headache and major depression each predict the other prospectively
- Stress, particularly chronic stress, appears to explain much of the association seen between migraine and major depression

### Strengths and Limitations

- Large, representative, prospective cohort study
- Migraine was self-reported with only a single question

## INTRODUCTION

Several studies support that migraine and psychopathologies, in particular major depression, often co-occur.<sup>[1-15]</sup> In a recent review of such comorbidities, Antonaci et al reported a meta-analysis of 12 studies, concluding that the odds ratio may be near 2.2 for major depression and migraine.<sup>[16]</sup> A limited number of prospective studies have examined the temporality of this association, largely concluding the predictive relationship is bidirectional (i.e., migraine status predicts depression onset and vice versa).<sup>[1, 2, 10]</sup> While the correlation has been well established, the mechanisms for this co-occurrence are less clear; causal paths may exist from one disorder to the other, and/or some shared common risk factor(s) (i.e., confounders) may cause both depression and migraine.

Migraine and depression indeed share several risk factors, and thus any perceived correlation between the two could potentially be due to this confounding. Prior research assessing their association has adjusted primarily for demographic variables, however some studies have separately studied other risk factors of a genetic and neurobiologic nature. Few studies, however, have focused on stress, a known risk factor for both migraine and depression. In Modgill and colleagues' analyses of the National Population Health Survey (NPHS), a representative longitudinal study of the Canadian population, childhood trauma attenuated the association between the two disorders, particularly for the direction of depression predicting migraine onset.<sup>[10]</sup> However, their analyses only looked at a limited number of stressors and did not attempt to address specifically how much different types of stressors may contribute to this association. A variety of stressors may confound the migraine-depression association, as many types have been found to be

1  
2  
3 risk factors for both disorders: e.g., childhood trauma,<sup>[10, 17]</sup> unemployment,<sup>[18, 19]</sup>  
4  
5 chronic/repeated stress,<sup>[20, 21]</sup> etc.  
6  
7

8  
9 In the current study, we extend upon Modgill et al's findings in the NPHS to  
10  
11 assess how much the association between migraine and depression may be explained by  
12  
13 various measures of stress, including a wide variety of prior and current stressors. We  
14  
15 assess this association longitudinally and bidirectionally.  
16  
17  
18  
19  
20  
21  
22  
23  
24  
25  
26  
27  
28  
29  
30  
31  
32  
33  
34  
35  
36  
37  
38  
39  
40  
41  
42  
43  
44  
45  
46  
47  
48  
49  
50  
51  
52  
53  
54  
55  
56  
57  
58  
59  
60

## METHODS

### *Sample*

The NPHS is a prospective, nationally representative study conducted by Statistics Canada that has followed a Canadian cohort since 1994/95. At study inception, individuals were randomly selected using a stratified two-stage sample design (n=17,276). The sample has been contacted every two years, with the most recent data collection in 2008/09.

For the purposes of this study, we restricted our sample to individuals aged 18 to 64 years in Cycle 4 (2000/01), with this assessment treated as “baseline” in the presented analyses. This serves two purposes: (1) as both migraine and depression assessments reflect current states rather than diagnostic histories, this allows us to use the first three assessments to construct a several-year history of each disorder prior to baseline; and (2) as some of the stressors were not assessed until this time (e.g., work stress, chronic stress) or could not be constructed without at least two assessments (e.g., change in social support, marital status, or employment), this allows a more complete analysis of the role of stressors in the migraine-depression comorbidity. Further information on our analytic sample is depicted in Figure 1.

### *Depression*

Major depressive episodes are assessed using the Composite International Diagnostic Interview Short Form for Major Depression (CIDI-SFMD) at all eight cycles. The CIDI-SFMD inquires about symptoms of major depression, as defined by the

1  
2  
3 Diagnostic and Statistical Manual of Mental Disorders IV (DSM-IV), during the  
4  
5 preceding 12 months. Kessler and colleagues<sup>[22]</sup> showed that the CIDI-SF has 93%  
6  
7 classification accuracy for major depressive episode when compared with the full-length  
8  
9 CIDI. Individuals who endorse five or more symptoms during a single two-week period  
10  
11 are considered to have a 90% probability of having major depression,<sup>[22]</sup> for the purposes  
12  
13 of this study, such individuals will be considered as having major depression in that year.  
14  
15

### 16 17 18 *Migraine*

19  
20  
21 Migraine is assessed in a single diagnostic question at each assessment. In the first  
22  
23 three assessments (1994/95; 1996/97; 1998/99), subjects were asked whether they  
24  
25 currently were having migraine headaches that had been diagnosed by a health  
26  
27 professional. In the subsequent five assessments (2000/01; 2002/03; 2004/05; 2006/07;  
28  
29 2008/09), subjects were asked whether they currently have migraine headaches. In these  
30  
31 last five assessments, subjects were further asked about the timing of onset of the  
32  
33 diagnosis.  
34  
35

### 36 37 38 *Stressors*

39  
40  
41 Using similar definitions as previous studies using NPHS data,<sup>[17]</sup> we defined  
42  
43 several types of stressors: childhood trauma, recent marital problems, recent  
44  
45 unemployment, recent household financial problems, work stress, chronic stress, and  
46  
47 change in social support. Childhood trauma was assessed in Cycle 1 (1994/95) for those  
48  
49 18 or older at that time, and in Cycle 4 (2000/01) for the rest of our cohort. Subjects were  
50  
51 asked about seven items of childhood trauma occurring prior to the individual turning 18:  
52  
53 parental divorce, a lengthy hospital stay, prolonged parental unemployment, frequent  
54  
55 parental alcohol or drug use and physical abuse. Childhood trauma was categorized as  
56  
57  
58  
59  
60



1  
2  
3 none, one event, and two or more events. Three recent stressful life changes were  
4 defined: marital problems, recent unemployment, and household financial problems.  
5  
6 Marital problems were defined by a change from reporting single, married, or partnered  
7 in Cycle 3 (1998/99) to divorced, widowed, or separated in Cycle 4 (2000/01). Recent  
8 unemployment was defined as being employed in Cycle 3 (1998/99) but reporting  
9 unemployment or not being in the labor force in Cycle 4 (2000/01). Household financial  
10 problems were defined as having a score above Statistic Canada's low income cut-off  
11 (LICO) in Cycle 3 (1998/99) followed by a score below the cut-off in Cycle 4 (2000/01).  
12 The LICO score takes into account the individual's income relative to the community in  
13 which an individual lives and the size of their household.<sup>[23, 24]</sup> Work stress was measured  
14 in Cycle 4 (2000/01) by 13 questions that assessed job security, autonomy, conflict and  
15 satisfaction,<sup>[24]</sup> the score was categorized by quartiles. Chronic stress was measured in  
16 Cycle 4 (2000/01) by 18 questions that assessed stress in one's personal life, focusing  
17 primarily on relationships and family strife;<sup>[24]</sup> this score was also broken into quartiles.  
18 Social support was measured by a 4-question scale in Cycles 3 and 4 (1998/99;  
19 2000/01);<sup>[24]</sup> this score was dichotomized at the median, and change in social support was  
20 conceptualized as a change from high to low social support.  
21  
22  
23  
24  
25  
26  
27  
28  
29  
30  
31  
32  
33  
34  
35  
36  
37  
38  
39  
40  
41  
42  
43

#### 44 *Statistical Analyses*

45  
46 We performed two sets of analyses. First, among those with no history of major  
47 depression (unweighted n=7,818), we assessed the onset of incident major depression  
48 comparing those with and without migraine at baseline; second, among those with no  
49 history of migraine (unweighted n=7,765), we assessed the onset of incident migraine  
50 comparing those with and without major depression at baseline. Cox Proportional  
51  
52  
53  
54  
55  
56  
57  
58  
59  
60

1  
2  
3 Hazards Models were fit, and hazards ratios (HR) and their 95% confidence intervals (CI)  
4 are presented. Models are presented as unadjusted; adjusting for sex and age; adjusting  
5 for sex, age, and each stress exposure individually; and adjusting for sex, age, and all  
6 stress exposures. Data analyses were completed using SAS 9.2 and SUDAAN 10.0.1. All  
7 estimates were weighted to adjust for unequal selection probabilities and cluster  
8 sampling; weights further adjust for attrition between the first and fourth cycle. Standard  
9 errors were calculated using the bootstrap method.  
10  
11  
12  
13  
14  
15  
16  
17  
18  
19  
20  
21  
22  
23  
24  
25  
26  
27  
28  
29  
30  
31  
32  
33  
34  
35  
36  
37  
38  
39  
40  
41  
42  
43  
44  
45  
46  
47  
48  
49  
50  
51  
52  
53  
54  
55  
56  
57  
58  
59  
60

## RESULTS

Demographic information is presented in **Table 1**. At baseline, 4.13, 9.13, and 1.33% of the sample reported current depression only, migraine only, and comorbid depression and migraine, respectively.

Models for depression status predicting incident migraine are presented in **Table 2**. Among non-migraineurs in Cycle 4 (2000/01), 5.52% developed migraine during the eight-year follow-up. The sex- and age-adjusted model suggested depression was predictive of incident migraine (HR: 1.62; 95% CI: 1.03-2.53). When adjusting further for stressors in separate models, estimates were further attenuated; adjusting for chronic stress attenuated the estimate the most (HR: 1.34; 95% CI: 0.84-2.13). When adjusting for all forms of stressors simultaneously, the depression-migraine estimate was attenuated to a HR of 1.30 (95% CI: 0.80-2.10).

Models for migraine status predicting incident depression are presented in **Table 3**. Among subjects who had not had a depression up through Cycle 4 (2000/01), 8.72% developed incident depression. Migraine status was predictive of incident depression in the age- and sex-adjusted model (HR: 1.55; 95% CI: 1.15-2.08). Adjusting for stressors in separate models attenuated this relationship, with adjustment for chronic stress affecting the estimate the most (HR: 1.33; 95% CI: 0.98-1.79). The fully adjusted model estimate for the migraine-depression HR was attenuated to 1.19 (95% CI: 0.86-1.66).

## DISCUSSION

Without considering common causes or other explanations, these results align with earlier findings supporting a bidirectionality to a migraine-depression association: in crude analyses, migraine status predicted incident depression, and depression status predicted incident migraine. However, both directions of this relationship are largely explained by stressors that likely increase risk for both migraine and depression: adjusting for all measured forms of stress in these surveys attenuated the each estimate considerably (estimates decreased from 1.62 to 1.30, and 1.55 to 1.19) and the associations were no longer significant after adjustment. Implications for research as well as clinical and public health practice are discussed.

Importantly, all stressors studied here did attenuate the results, suggesting that any form of stress may be an important common cause to consider when studying migraine and depression. This finding follows from prior research that supports both acute and chronic forms of stress as being confounders, since these have been shown to predict depression and migraine.<sup>[10, 17-21]</sup> The present study suggests that prior studies that these stressors collectively explain much of the perceived migraine-depression association; research that does not account for these common causes when studying depression and migraine may be presenting misleading estimates. The perceived migraine-depression associations presented in many prior studies may be largely explained by unmeasured confounding by such types of stressors. The magnitude of confounding due to each specific stressor is dependent on several factors, including the strength of the covariate-exposure association, the strength of the covariate-outcome association, and the prevalence of the covariate. Our measure of chronic stress was strongly predictive of both

1  
2  
3 migraine and depression onset, as well as associated with these disorders at baseline, and  
4  
5 thus was the strongest risk factor considered in the present analyses. On the other hand,  
6  
7 recent changes in employment and marital status were relatively rare life events, and  
8  
9 were not strongly predictive of these disorders, so the magnitude of attenuation when  
10  
11 considering each of these variables was minor. Optimally, future studies of migraine and  
12  
13 depression would assess all potential confounders; as this is not always feasible,  
14  
15 investigators may consider prioritizing assessing chronic stress over some of these other  
16  
17 stressors, and accompany results with sensitivity or bias analyses for any stressors that  
18  
19 remained unmeasured.  
20  
21  
22  
23  
24

25 Our finding that chronic stress was the strongest stress-related risk factor fits into  
26  
27 the broader context of research suggesting that chronic stress may be causative of various  
28  
29 types of chronic pain and major depression. In disentangling the relationship between  
30  
31 depression, chronic stress, and chronic pain such as fibromyalgia, it has been proposed that  
32  
33 chronic stress may lead to dysfunction in the hypothalamic-pituitary-adrenal axis, which  
34  
35 in turn could lead to both depression and some forms of chronic pain.<sup>[25]</sup> Research  
36  
37 specific to stress and migraine supports this biological theory.<sup>[26]</sup> Notably, childhood  
38  
39 trauma was a strong risk factor in migraine predicting depression; as many of the types of  
40  
41 trauma assessed were chronic in nature, this aligns with the finding that perhaps chronic  
42  
43 forms of stress are especially potent common causes of migraine and depression.  
44  
45  
46  
47  
48

49 Although certainly some of the crude association between depression and  
50  
51 migraine may still be explained by genetics, other common causes, and/or biological  
52  
53 pathways between the two disorders, the current findings suggest interesting  
54  
55 considerations when developing future intervention strategies. Given the possibility of a  
56  
57  
58  
59  
60

1  
2  
3 biological mechanism between these two disorders, much research attention has been  
4  
5 focused on the efficacy of antidepressant medications on preventing and managing  
6  
7 migraine, with mixed success.<sup>[27-29]</sup> However, the current study suggests that perhaps a  
8  
9 primary strategy could target reducing stress, particularly chronic stress, as this may both  
10  
11 reduce the burden of the index disorder as well as potentially prevent the second  
12  
13 condition from occurring. Indeed, there have been studies showing that various  
14  
15 behavioural or stress management therapies (e.g., Cognitive-Behavioral Therapy) are  
16  
17 effective treatments for migraine, supporting one aspect of this hypothesis.<sup>[30-32]</sup> Given  
18  
19 how much chronic stress and other stressors seem to explain the comorbidity, such a  
20  
21 strategy may have the potential for reducing this comorbidity burden on a larger scale  
22  
23 than some of these other postulated pharmacological strategies, although further research  
24  
25 actually comparing such treatment strategies would be needed. Utilizing a stress-reducing  
26  
27 strategy to address this comorbidity assumes that stress is (directly or indirectly)  
28  
29 causative of both disorders, while it is possible that stress is a risk factor through  
30  
31 associations with a common cause.  
32  
33  
34  
35  
36  
37  
38

39  
40 The study has numerous strengths. This is one of only a few studies to  
41  
42 prospectively assess the migraine-depression comorbidity bidirectionally,<sup>[1, 2, 10]</sup> and  
43  
44 extends these previous findings by examining whether a rich assortment of widely-used  
45  
46 stress measures explained the associations found. The nationally-representative nature of  
47  
48 the study aids the generalizability of these findings, and the sample size and length of  
49  
50 follow-up are exceptional.  
51  
52

53  
54 However, certain limitations warrant consideration. Migraine was assessed as  
55  
56 only a single, self-reported question at each cycle. Self-reported symptom-based  
57  
58  
59  
60

1  
2  
3 assessments do generally report a higher prevalence than doctor diagnoses;<sup>[33]</sup> the  
4  
5 assessment in the NPHS inquires about diagnosis by a health professional which may  
6  
7 offset some of this over-reporting, but certainly misclassification may still be an issue.  
8  
9 Specifically, self-report may be further inflated in depressed individuals, which may  
10  
11 actually contribute to some overestimation in our associations. While the measure of  
12  
13 major depression (CIDI-SFMD) has demonstrated psychometric properties,<sup>[22, 34, 35]</sup> the  
14  
15 12-month diagnosis (which thus does not cover the 2 years between each study  
16  
17 assessment) hinders inference about history of major depression, possible episodes  
18  
19 unmeasured in the gap years of the study, and actual timing of onset of the disorder;  
20  
21 subjects who have less frequent depressive episodes or episodes that are shorter in  
22  
23 duration would be less likely to be measured accurately. However, by using an interim  
24  
25 cycle as “baseline”, we were able to construct over a half-decade profile of subjects’  
26  
27 “history” of major depression to diminish the issue regarding assessing history. Finally,  
28  
29 we did not have complete follow-up for all subjects. Weighting was used to correct for  
30  
31 attrition between Cycles 1 and 4. From Cycle 4 through 8 the majority of subjects were  
32  
33 assessed eight years later (see Figure 1), and follow-up duration was not associated with  
34  
35 migraine or depression status at baseline. Follow-up duration, however, was associated  
36  
37 with age and a few stressors (greater chronic stress, recent unemployment, and recent  
38  
39 divorce were associated with shorter follow-up;  $p$ 's<0.05); however, as stress likely  
40  
41 predicts higher levels of the outcome disorders, its likely this implies that some subjects  
42  
43 were censored prior to onset of the outcome, meaning that stress would explain even  
44  
45 more of the association measured had complete follow-up occurred.  
46  
47  
48  
49  
50  
51  
52  
53  
54  
55  
56  
57  
58  
59  
60

1  
2  
3  
4  
5  
6  
7  
8  
9  
10  
11  
12  
13  
14  
15  
16  
17  
18  
19  
20  
21  
22  
23  
24  
25  
26  
27  
28  
29  
30  
31

These analyses highlight considerations for future research. These analyses represent a rich assortment of stressors, but several other stressors may also merit examination, e.g., childhood sexual abuse, acute recent traumas such as injury or illness, etc. Further, as some of the stressors were only assessed in one or two cycles, we were not able to fully address the time-varying nature of the relationships between stress and these episodic conditions. Given that we found recent and prior stress to be relevant in this comorbidity, future research may wish to more closely examine the time-varying relationship between stress and these two conditions individually and comorbidly. Specifically, while stress is a risk factor for both disorders, it may also be caused by each disorder, and thus assessing temporal relationships using models that account for time-varying confounding appropriately (e.g., marginal structural models), may highlight the relationship between these variables further.

32  
33  
34  
35  
36  
37  
38  
39  
40  
41  
42  
43  
44  
45  
46  
47  
48  
49  
50  
51  
52  
53  
54  
55  
56  
57  
58  
59  
60

Understanding the causal mechanisms underlying the migraine-depression comorbidity may have a major public health impact. Major depression is a chief cause of disability worldwide,<sup>[36]</sup> estimated by the World Health Organization to become the second leading cause of disease burden by the year 2020.<sup>[37]</sup> Meanwhile, migraine affects 11% of the adult population, and when combined with other headache disorders also makes it into the top ten causes of disability by World Health Organization estimates.<sup>[38]</sup> Moreover, studies suggest that the disability and burden of these disorders may be compounded when present together;<sup>[5]</sup> disease severity appears greater when these disorders are comorbid, e.g., frequency and duration of migraine attacks have a significant association with psychiatric comorbidity.<sup>[39]</sup> Migraine patients with a psychiatric disorder report generally lower quality of life than other migraine patients;<sup>[8]</sup>



1  
2  
3 in parallel, depression patients who report migraine also report poorer quality of life  
4  
5 compared to other depression patients.<sup>[40]</sup> As such, implementation of effective stress-  
6  
7 management strategies for migraineurs and those suffering from depression (as well as  
8  
9 similar strategies to prevent the index disorder onset) may have major implications for  
10  
11 prevention and intervention strategies that may lower the societal costs and burdens of  
12  
13 both disorders.  
14  
15  
16  
17  
18  
19  
20  
21  
22  
23  
24  
25  
26  
27  
28  
29  
30  
31  
32  
33  
34  
35  
36  
37  
38  
39  
40  
41  
42  
43  
44  
45  
46  
47  
48  
49  
50  
51  
52  
53  
54  
55  
56  
57  
58  
59  
60

## REFERENCES

1. Breslau N, Lipton RB, Stewart WF, et al. Comorbidity of migraine and depression: investigating potential etiology and prognosis. *Neurology*. 2003 Apr 22;60(8):1308-12.
2. Breslau N, Schultz LR, Stewart WF, et al. Headache and major depression: is the association specific to migraine? *Neurology*. 2000 Jan 25;54(2):308-13.
3. Camarda C, Pipia C, Tagliavori A, et al. Comorbidity between depressive symptoms and migraine: preliminary data from the Zabut Aging Project. *Neurol Sci*. 2008 May;29 Suppl 1:S149-51.
4. Hung CI, Liu CY, Cheng YT, et al. Migraine: a missing link between somatic symptoms and major depressive disorder. *J Affect Disord*. 2009 Sep;117(1-2):108-15.
5. Jette N, Patten S, Williams J, et al. Comorbidity of migraine and psychiatric disorders--a national population-based study. *Headache*. 2008 Apr;48(4):501-16.
6. Kececi H, Dener S, Analan E. Co-morbidity of migraine and major depression in the Turkish population. *Cephalalgia*. 2003 May;23(4):271-5.
7. Lanteri-Minet M, Valade D, Geraud G, et al. Migraine and probable migraine--results of FRAMIG 3, a French nationwide survey carried out according to the 2004 IHS classification. *Cephalalgia*. 2005 Dec;25(12):1146-58.
8. Lipton RB, Hamelsky SW, Kolodner KB, et al. Migraine, quality of life, and depression: a population-based case-control study. *Neurology*. 2000 Sep 12;55(5):629-35.
9. McWilliams LA, Goodwin RD, Cox BJ. Depression and anxiety associated with three pain conditions: results from a nationally representative sample. *Pain*. 2004 Sep;111(1-2):77-83.
10. Modgill G, Jette N, Wang JL, et al. A population-based longitudinal community study of major depression and migraine. *Headache*. [Research Support, Non-U.S. Gov't]. 2012 Mar;52(3):422-32.
11. Molgat CV, Patten SB. Comorbidity of major depression and migraine--a Canadian population-based study. *Can J Psychiatry*. [Research Support, Non-U.S. Gov't]. 2005 Nov;50(13):832-7.
12. Ratcliffe GE, Enns MW, Jacobi F, et al. The relationship between migraine and mental disorders in a population-based sample. *Gen Hosp Psychiatry*. 2009 Jan-Feb;31(1):14-9.
13. Rhee H. Prevalence and predictors of headaches in US adolescents. *Headache*. 2000 Jul-Aug;40(7):528-38.
14. Samaan Z, Farmer A, Craddock N, et al. Migraine in recurrent depression: case-control study. *Br J Psychiatry*. 2009 Apr;194(4):350-4.
15. Wang SJ, Liu HC, Fuh JL, et al. Comorbidity of headaches and depression in the elderly. *Pain*. 1999 Sep;82(3):239-43.
16. Antonaci F, Nappi G, Galli F, et al. Migraine and psychiatric comorbidity: a review of clinical findings. *J Headache Pain*. Jan 6.
17. Colman I, Garad Y, Zeng Y, et al. Stress and development of depression and heavy drinking in adulthood: moderating effects of childhood trauma. *Soc Psychiatry Psychiatr Epidemiol*. 2012 Jun 9.

- 1  
2  
3  
4  
5  
6  
7  
8  
9  
10  
11  
12  
13  
14  
15  
16  
17  
18  
19  
20  
21  
22  
23  
24  
25  
26  
27  
28  
29  
30  
31  
32  
33  
34  
35  
36  
37  
38  
39  
40  
41  
42  
43  
44  
45  
46  
47  
48  
49  
50  
51  
52  
53  
54  
55  
56  
57  
58  
59  
60
18. Le H, Tfelt-Hansen P, Skytthe A, et al. Association between migraine, lifestyle and socioeconomic factors: a population-based cross-sectional study. *The journal of headache and pain*. [Twin Study]. 2011 Apr;12(2):157-72.
19. Gili M, Roca M, Basu S, et al. The mental health risks of economic crisis in Spain: evidence from primary care centres, 2006 and 2010. *Eur J Public Health*. 2012 Apr 19.
20. Maleki N, Becerra L, Borsook D. Migraine: maladaptive brain responses to stress. *Headache*. 2012 Oct;52 Suppl 2:102-6.
21. Risch N, Herrell R, Lehner T, et al. Interaction between the serotonin transporter gene (5-HTTLPR), stressful life events, and risk of depression: a meta-analysis. *Jama*. [Meta-Analysis
- Research Support, N.I.H., Extramural
- Research Support, N.I.H., Intramural]. 2009 Jun 17;301(23):2462-71.
22. Kessler RC, Andrews G, Mroczek DK, et al. The World Health Organization Composite International Diagnostic Interview short-form (CIDI-SF). *Int J Methods Psychiatr Res*. 1998;7(5):171-85.
23. Cotton C. Recent developments in the low income cut offs. Ottawa: Statistics Canada; 2001.
24. Statistics Canada. National Population Health Survey Cycle 1 (1994-1995). Public use microdata files documentation. Ottawa 1995.
25. Blackburn-Munro G. Hypothalamo-pituitary-adrenal axis dysfunction as a contributory factor to chronic pain and depression. *Curr Pain Headache Rep*. [Review]. 2004 Apr;8(2):116-24.
26. Sauro KM, Becker WJ. The stress and migraine interaction. *Headache*. [Review]. 2009 Oct;49(9):1378-86.
27. Adelman LC, Adelman JU, Von Seggern R, et al. Venlafaxine extended release (XR) for the prophylaxis of migraine and tension-type headache: A retrospective study in a clinical setting. *Headache*. [Clinical Trial
- Research Support, Non-U.S. Gov't]. 2000 Jul-Aug;40(7):572-80.
28. Sheftell FD, Atlas SJ. Migraine and psychiatric comorbidity: from theory and hypotheses to clinical application. *Headache*. 2002 Oct;42(9):934-44.
29. Silberstein SD, Goadsby PJ. Migraine: preventive treatment. *Cephalalgia : an international journal of headache*. [Review]. 2002 Sep;22(7):491-512.
30. Martin PR, Forsyth MR, Reece J. Cognitive-behavioral therapy versus temporal pulse amplitude biofeedback training for recurrent headache. *Behav Ther*. [Randomized Controlled Trial]. 2007 Dec;38(4):350-63.
31. Penzien DB. Stress management for migraine: recent research and commentary. *Headache*. [Review]. 2009 Oct;49(9):1395-8.
32. Rains JC, Penzien DB, McCrory DC, et al. Behavioral headache treatment: history, review of the empirical literature, and methodological critique. *Headache*. [Review]. 2005 May;45 Suppl 2:S92-109.
33. Cousins G, Hijazze S, Van de Laar FA, et al. Diagnostic accuracy of the ID Migraine: a systematic review and meta-analysis. *Headache*. [Meta-Analysis Research Support, Non-U.S. Gov't Review]. 2011 Jul-Aug;51(7):1140-8.

- 1  
2  
3 34. Patten SB. Performance of the Composite International Diagnostic Interview  
4 Short Form for major depression in community and clinical samples. *Chronic Dis Can.*  
5 [Comparative Study]. 1997;18(3):109-12.  
6  
7 35. Patten SB, Brandon-Christie J, Devji J, et al. Performance of the composite  
8 international diagnostic interview short form for major depression in a community  
9 sample. *Chronic Dis Can.* 2000;21(2):68-72.  
10  
11 36. Ustun TB, Kessler RC. Global burden of depressive disorders: the issue of  
12 duration. *Br J Psychiatry.* 2002 Sep;181:181-3.  
13  
14 37. Simon GE. Social and economic burden of mood disorders. *Biol Psychiatry.* 2003  
15 Aug 1;54(3):208-15.  
16  
17 38. Stovner L, Hagen K, Jensen R, et al. The global burden of headache: a  
18 documentation of headache prevalence and disability worldwide. *Cephalalgia.* 2007  
19 Mar;27(3):193-210.  
20  
21 39. Mitsikostas DD, Thomas AM. Comorbidity of headache and depressive disorders.  
22 *Cephalalgia.* 1999 May;19(4):211-7.  
23  
24 40. Hung CI, Wang SJ, Hsu KH, et al. Risk factors associated with migraine or  
25 chronic daily headache in out-patients with major depressive disorder. *Acta Psychiatr*  
26 *Scand.* 2005 Apr;111(4):310-5.  
27  
28  
29  
30  
31  
32  
33  
34  
35  
36  
37  
38  
39  
40  
41  
42  
43  
44  
45  
46  
47  
48  
49  
50  
51  
52  
53  
54  
55  
56  
57  
58  
59  
60

## ACKNOWLEDGMENTS

The authors would like to thank Ms. Irene Wong of Statistics Canada for her assistance with data access and use. The research and analysis are based on data from Statistics Canada and the opinions expressed do not represent the views of Statistics Canada.

## FUNDING

This research was undertaken, in part, thanks to funding from the Canada Research Chairs program for Dr. Colman. Funders had no role in study design, data collection and analysis, decision to publish, or preparation of the manuscript.

## COMPETING INTERESTS

None declared

## AUTHOR CONTRIBUTIONS

SS and IC conceived and designed the study and interpreted the results. SS, YZ and MW performed the data analysis. SS wrote the manuscript. All authors critically reviewed the final manuscript.

1  
2  
3  
4  
5  
6  
7  
8  
9  
10  
11  
12  
13  
14  
15  
16  
17  
18  
19  
20  
21  
22  
23  
24  
25  
26  
27  
28  
29  
30  
31  
32  
33  
34  
35  
36  
37  
38  
39  
40  
41  
42  
43  
44  
45  
46  
47  
48  
49

Table 1. Sample Characteristics Ages 18-64, % (SE)

| Variable                                                        | Unweighted N | % (SE)        |
|-----------------------------------------------------------------|--------------|---------------|
| <b>N</b>                                                        | 9,342        |               |
| <b>Sex</b>                                                      |              |               |
| Male                                                            | 4,986        | 50.31 (0.17)  |
| Female                                                          | 4,356        | 49.69 (0.17)  |
| <b>Age, mean (range)</b>                                        |              | 40.77 (18-64) |
| <b>Baseline Migraine/Depression Comorbidity</b>                 |              |               |
| None                                                            | 7,619        | 85.41 (0.49)  |
| Depression Only                                                 | 404          | 4.13 (0.29)   |
| Migraine Only                                                   | 839          | 9.13 (0.40)   |
| Depression and Migraine                                         | 124          | 1.33 (0.17)   |
| <b>Childhood Trauma</b>                                         |              |               |
| 0                                                               | 4,194        | 49.61 (0.74)  |
| 1                                                               | 2,265        | 25.82 (0.64)  |
| 2+                                                              | 2,274        | 24.57 (0.65)  |
| <b>Recent Marital Change to Divorced, Separated, or Widowed</b> |              |               |
| Yes                                                             | 214          | 2.47 (0.23)   |
| No                                                              | 8,781        | 97.53 (0.23)  |
| <b>Recent Unemployment</b>                                      |              |               |
| Yes                                                             | 394          | 4.34 (0.32)   |
| No                                                              | 8,670        | 95.66 (0.32)  |
| <b>Recent Change in Social Support</b>                          |              |               |
| Yes                                                             | 1,359        | 16.76 (0.60)  |
| No                                                              | 6,961        | 83.24 (0.60)  |
| <b>Years of Follow-Up</b>                                       |              |               |
| Median                                                          |              | 7.30          |
| IQR                                                             |              | 6.29-7.67     |

Table 2. Adjusted hazard ratios for depression predicting migraine, adjusting for various stressors, age, and sex

|                                     | Model 1<br>(n=7,076) | Model 2<br>(n=7,076) | Model 3<br>(n=6,678) | Model 4<br>(n=6,868) | Model 5<br>(n=6,953) | Model 6<br>(n=7,064) | Model 7<br>(n=7,044) | Model 8<br>(n=7,076) | Model 9<br>(n=6,339) |
|-------------------------------------|----------------------|----------------------|----------------------|----------------------|----------------------|----------------------|----------------------|----------------------|----------------------|
| <b>Depression</b>                   |                      |                      |                      |                      |                      |                      |                      |                      |                      |
| Yes                                 | 1.85 (1.20-2.85)     | 1.62 (1.03-2.53)     | 1.59 (1.03-2.46)     | 1.56 (0.98-2.47)     | 1.61 (1.02-2.53)     | 1.52 (0.97-2.38)     | 1.34 (0.84-2.13)     | 1.61 (1.02-2.54)     | 1.30 (0.80-2.10)     |
| No                                  | Reference            |
| <b>Childhood Trauma</b>             |                      |                      |                      |                      |                      |                      |                      |                      |                      |
| None                                |                      |                      | Reference            |                      |                      |                      |                      |                      | Reference            |
| 1                                   |                      |                      | 0.95 (0.66-1.37)     |                      |                      |                      |                      |                      | 0.90 (0.60-1.33)     |
| 2+                                  |                      |                      | 1.34 (1.00-1.79)     |                      |                      |                      |                      |                      | 1.09 (0.79-1.51)     |
| <b>Recent Marital Status Change</b> |                      |                      |                      |                      |                      |                      |                      |                      |                      |
| Yes                                 |                      |                      |                      | 1.54 (0.82-2.90)     |                      |                      |                      |                      | 1.28 (0.59-2.75)     |
| No                                  |                      |                      |                      | Reference            |                      |                      |                      |                      | Reference            |
| <b>Recent Unemployment</b>          |                      |                      |                      |                      |                      |                      |                      |                      |                      |
| Yes                                 |                      |                      |                      |                      | 1.00 (0.44-2.30)     |                      |                      |                      | 0.72 (0.29-1.78)     |
| No                                  |                      |                      |                      |                      | Reference            |                      |                      |                      | Reference            |
| <b>Work Stress</b>                  |                      |                      |                      |                      |                      |                      |                      |                      |                      |
| 1 <sup>st</sup> Quartile            |                      |                      |                      |                      |                      | Reference            |                      |                      | Reference            |
| 2 <sup>nd</sup> Quartile            |                      |                      |                      |                      |                      | 0.63 (0.42-0.95)     |                      |                      | 0.61 (0.39-0.95)     |
| 3 <sup>rd</sup> Quartile            |                      |                      |                      |                      |                      | 0.66 (0.45-0.96)     |                      |                      | 0.63 (0.41-0.96)     |
| 4 <sup>th</sup> Quartile            |                      |                      |                      |                      |                      | 0.89 (0.61-1.31)     |                      |                      | 0.81 (0.52-1.27)     |
| <b>Chronic Stress</b>               |                      |                      |                      |                      |                      |                      |                      |                      |                      |
| 1 <sup>st</sup> Quartile            |                      |                      |                      |                      |                      |                      | Reference            |                      | Reference            |
| 2 <sup>nd</sup> Quartile            |                      |                      |                      |                      |                      |                      | 0.91 (0.59-1.40)     |                      | 0.99 (0.63-1.56)     |
| 3 <sup>rd</sup> Quartile            |                      |                      |                      |                      |                      |                      | 1.58 (1.11-2.25)     |                      | 1.64 (1.12-2.41)     |
| 4 <sup>th</sup> Quartile            |                      |                      |                      |                      |                      |                      | 1.76 (1.22-2.53)     |                      | 1.68 (1.08-2.61)     |
| <b>Change in Social Support</b>     |                      |                      |                      |                      |                      |                      |                      |                      |                      |
| Yes                                 |                      |                      |                      |                      |                      |                      |                      | 0.77 (0.54-1.11)     | 0.84 (0.58-1.21)     |
| No                                  |                      |                      |                      |                      |                      |                      |                      | Reference            | Reference            |
| <b>Sex</b>                          |                      |                      |                      |                      |                      |                      |                      |                      |                      |
| Male                                |                      | Reference            |
| Female                              |                      | 2.39 (1.83-3.12)     | 2.34 (1.79-3.08)     | 2.49 (1.90-3.26)     | 2.44 (1.86-3.20)     | 2.28 (1.73-2.99)     | 2.39 (1.83-3.12)     | 2.48 (1.89-3.25)     | 2.32 (1.73-3.11)     |
| <b>Age (continuous)</b>             |                      |                      |                      |                      |                      |                      |                      |                      |                      |
|                                     |                      | 0.98 (0.97-0.99)     | 0.98 (0.97-0.99)     | 0.98 (0.97-0.99)     | 0.98 (0.97-0.99)     | 0.98 (0.97-0.99)     | 0.98 (0.97-0.99)     | 0.98 (0.97-0.99)     | 0.98 (0.97-0.99)     |

Table 3. Adjusted hazard ratios for migraine predicting depression, adjusting for various stressors, age, and sex

|                                 | Model 1<br>(n=7,339) | Model 2<br>(n=7,339) | Model 3<br>(n=6,840) | Model 4<br>(n=7,121) | Model 5<br>(n=7,176) | Model 6<br>(n=7,144) | Model 7<br>(n=7,127) | Model 8<br>(n=7,339) | Model 9<br>(n=6,387) |
|---------------------------------|----------------------|----------------------|----------------------|----------------------|----------------------|----------------------|----------------------|----------------------|----------------------|
| <b>Migraine</b>                 |                      |                      |                      |                      |                      |                      |                      |                      |                      |
| Yes                             | 1.84 (1.38-2.45)     | 1.55 (1.15-2.08)     | 1.43 (1.06-1.92)     | 1.46 (1.08-1.98)     | 1.54 (1.14-2.08)     | 1.51 (1.11-2.05)     | 1.33 (0.98-1.79)     | 1.46 (1.07-1.99)     | 1.19 (0.86-1.66)     |
| No                              | Reference            |
| <b>Childhood Trauma</b>         |                      |                      |                      |                      |                      |                      |                      |                      |                      |
| None                            |                      |                      | Reference            |                      |                      |                      |                      |                      | Reference            |
| 1                               |                      |                      | 1.23 (0.92-1.64)     |                      |                      |                      |                      |                      | 1.14 (0.84-1.55)     |
| 2+                              |                      |                      | 2.36 (1.79-3.12)     |                      |                      |                      |                      |                      | 1.89 (1.38-2.59)     |
| <b>Recent Marital Status</b>    |                      |                      |                      |                      |                      |                      |                      |                      |                      |
| <b>Change</b>                   |                      |                      |                      |                      |                      |                      |                      |                      |                      |
| Yes                             |                      |                      |                      | 0.91 (0.40-2.06)     |                      |                      |                      |                      | 0.78 (0.33-1.84)     |
| No                              |                      |                      |                      | Reference            |                      |                      |                      |                      | Reference            |
| <b>Recent Unemployed</b>        |                      |                      |                      |                      |                      |                      |                      |                      |                      |
| Yes                             |                      |                      |                      |                      | 1.52 (0.93-2.49)     |                      |                      |                      | 1.16 (0.68-1.99)     |
| No                              |                      |                      |                      |                      | Reference            |                      |                      |                      | Reference            |
| <b>Work Stress</b>              |                      |                      |                      |                      |                      |                      |                      |                      |                      |
| 1 <sup>st</sup> Quartile        |                      |                      |                      |                      |                      | Reference            |                      |                      | Reference            |
| 2 <sup>nd</sup> Quartile        |                      |                      |                      |                      |                      | 0.64 (0.48-0.85)     |                      |                      | 0.70 (0.52-0.95)     |
| 3 <sup>rd</sup> Quartile        |                      |                      |                      |                      |                      | 0.69 (0.50-0.94)     |                      |                      | 0.76 (0.55-1.06)     |
| 4 <sup>th</sup> Quartile        |                      |                      |                      |                      |                      | 1.12 (0.84-1.51)     |                      |                      | 1.06 (0.77-1.48)     |
| <b>Chronic Stress</b>           |                      |                      |                      |                      |                      |                      |                      |                      |                      |
| 1 <sup>st</sup> Quartile        |                      |                      |                      |                      |                      |                      | Reference            |                      | Reference            |
| 2 <sup>nd</sup> Quartile        |                      |                      |                      |                      |                      |                      | 1.45 (1.06-2.00)     |                      | 1.47 (1.03-2.08)     |
| 3 <sup>rd</sup> Quartile        |                      |                      |                      |                      |                      |                      | 2.02 (1.50-2.73)     |                      | 1.89 (1.37-2.62)     |
| 4 <sup>th</sup> Quartile        |                      |                      |                      |                      |                      |                      | 2.93 (2.20-3.88)     |                      | 2.49 (1.80-3.44)     |
| <b>Change in Social Support</b> |                      |                      |                      |                      |                      |                      |                      |                      |                      |
| Yes                             |                      |                      |                      |                      |                      |                      |                      | 0.91 (0.69-1.20)     | 0.94 (0.71-1.23)     |
| No                              |                      |                      |                      |                      |                      |                      |                      | Reference            | Reference            |
| <b>Sex</b>                      |                      |                      |                      |                      |                      |                      |                      |                      |                      |
| Male                            |                      | Reference            |
| Female                          |                      | 1.91 (1.52-2.39)     | 1.86 (1.49-2.34)     | 1.94 (1.55-2.44)     | 1.92 (1.53-2.41)     | 1.80 (1.43-2.27)     | 1.89 (1.50-2.37)     | 1.89 (1.50-2.39)     | 1.83 (1.43-2.34)     |
| <b>Age (continuous)</b>         |                      |                      |                      |                      |                      |                      |                      |                      |                      |
|                                 |                      | 0.98 (0.97-0.99)     | 0.98 (0.97-0.99)     | 0.98 (0.97-0.99)     | 0.98 (0.97-0.99)     | 0.98 (0.97-0.99)     | 0.98 (0.97-0.99)     | 0.98 (0.97-0.99)     | 0.98 (0.97-0.99)     |



Figure 1. Flow diagram of sample inclusion and exclusion during study period

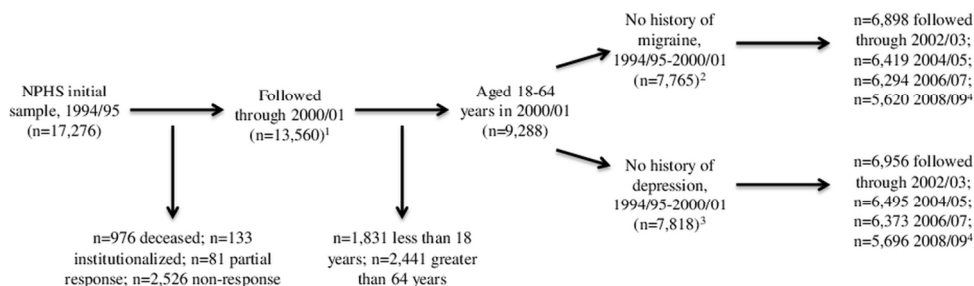

1. Analyses incorporate weights to account for attrition between 1994/95 and 2000/01 as well as unequal selection probabilities and cluster sampling from the initial study design.
2. Analyses of depression status in 2000/01 predicting migraine onset are performed on this sub-cohort.
3. Analyses of migraine status in 2000/01 predicting depression onset are performed on this sub-cohort.
4. Median follow-up time of participants aged 18-64 years in 2000/01 was 7.30 further years (IQR = 6.29-7.67).

119x90mm (300 x 300 DPI)

View only

STROBE Statement—Checklist of items that should be included in reports of *cohort studies*

|                              | Check? | Recommendation                                                                                                                                                                                                                                                                                                         |
|------------------------------|--------|------------------------------------------------------------------------------------------------------------------------------------------------------------------------------------------------------------------------------------------------------------------------------------------------------------------------|
| <b>Title and abstract</b>    | x      | (a) Indicate the study's design with a commonly used term in the title or the abstract<br>(b) Provide in the abstract an informative and balanced summary of what was done and what was found                                                                                                                          |
| <b>Introduction</b>          |        |                                                                                                                                                                                                                                                                                                                        |
| Background/rationale         | x      | Explain the scientific background and rationale for the investigation being reported                                                                                                                                                                                                                                   |
| Objectives                   | x      | State specific objectives, including any prespecified hypotheses                                                                                                                                                                                                                                                       |
| <b>Methods</b>               |        |                                                                                                                                                                                                                                                                                                                        |
| Study design                 | x      | Present key elements of study design early in the paper                                                                                                                                                                                                                                                                |
| Setting                      | x      | Describe the setting, locations, and relevant dates, including periods of recruitment, exposure, follow-up, and data collection                                                                                                                                                                                        |
| Participants                 | x      | (a) Give the eligibility criteria, and the sources and methods of selection of participants. Describe methods of follow-up<br>(b) For matched studies, give matching criteria and number of exposed and unexposed                                                                                                      |
| Variables                    | x      | Clearly define all outcomes, exposures, predictors, potential confounders, and effect modifiers. Give diagnostic criteria, if applicable                                                                                                                                                                               |
| Data sources/<br>measurement | x      | For each variable of interest, give sources of data and details of methods of assessment (measurement). Describe comparability of assessment methods if there is more than one group                                                                                                                                   |
| Bias                         | x      | Describe any efforts to address potential sources of bias                                                                                                                                                                                                                                                              |
| Study size                   | x      | Explain how the study size was arrived at                                                                                                                                                                                                                                                                              |
| Quantitative variables       | x      | Explain how quantitative variables were handled in the analyses. If applicable, describe which groupings were chosen and why                                                                                                                                                                                           |
| Statistical methods          | x      | (a) Describe all statistical methods, including those used to control for confounding<br>(b) Describe any methods used to examine subgroups and interactions<br>(c) Explain how missing data were addressed<br>(d) If applicable, explain how loss to follow-up was addressed<br>(e) Describe any sensitivity analyses |
| <b>Results</b>               |        |                                                                                                                                                                                                                                                                                                                        |
| Participants                 | x      | (a) Report numbers of individuals at each stage of study—eg numbers potentially eligible, examined for eligibility, confirmed eligible, included in the study, completing follow-up, and analysed<br>(b) Give reasons for non-participation at each stage<br>(c) Consider use of a flow diagram                        |
| Descriptive data             | x      | (a) Give characteristics of study participants (eg demographic, clinical, social) and information on exposures and potential confounders<br>(b) Indicate number of participants with missing data for each variable of interest<br>(c) Summarise follow-up time (eg, average and total amount)                         |
| Outcome data                 | x      | Report numbers of outcome events or summary measures over                                                                                                                                                                                                                                                              |

1  
2  
3  
4  
5  
6  
7  
8  
9  
10  
11  
12  
13  
14  
15  
16  
17  
18  
19  
20  
21  
22  
23  
24  
25  
26  
27  
28  
29  
30  
31  
32  
33  
34  
35  
36  
37  
38  
39  
40  
41  
42  
43  
44  
45  
46  
47  
48  
49  
50  
51  
52  
53  
54  
55  
56  
57  
58  
59  
60

|                          |   |                                                                                                                                                                                                                                                                                                                                                                                                               |
|--------------------------|---|---------------------------------------------------------------------------------------------------------------------------------------------------------------------------------------------------------------------------------------------------------------------------------------------------------------------------------------------------------------------------------------------------------------|
|                          |   | time                                                                                                                                                                                                                                                                                                                                                                                                          |
| Main results             | x | (a) Give unadjusted estimates and, if applicable, confounder-adjusted estimates and their precision (eg, 95% confidence interval). Make clear which confounders were adjusted for and why they were included<br>(b) Report category boundaries when continuous variables were categorized<br>(c) If relevant, consider translating estimates of relative risk into absolute risk for a meaningful time period |
| Other analyses           | x | Report other analyses done—eg analyses of subgroups and interactions, and sensitivity analyses                                                                                                                                                                                                                                                                                                                |
| <b>Discussion</b>        |   |                                                                                                                                                                                                                                                                                                                                                                                                               |
| Key results              | x | Summarise key results with reference to study objectives                                                                                                                                                                                                                                                                                                                                                      |
| Limitations              | x | Discuss limitations of the study, taking into account sources of potential bias or imprecision. Discuss both direction and magnitude of any potential bias                                                                                                                                                                                                                                                    |
| Interpretation           | x | Give a cautious overall interpretation of results considering objectives, limitations, multiplicity of analyses, results from similar studies, and other relevant evidence                                                                                                                                                                                                                                    |
| Generalisability         | x | Discuss the generalisability (external validity) of the study results                                                                                                                                                                                                                                                                                                                                         |
| <b>Other information</b> |   |                                                                                                                                                                                                                                                                                                                                                                                                               |
| Funding                  | x | Give the source of funding and the role of the funders for the present study and, if applicable, for the original study on which the present article is based                                                                                                                                                                                                                                                 |

Number of References: 40

Abstract Word Count: 166

Main Text Word Count: 2,812

Tables: 3

Figures: 1

**The Contribution of Stress to the Comorbidity of Migraine and Major Depression:  
Results from a Prospective Cohort Study**

Sonja A. Swanson<sup>1</sup>, Yiye Zeng<sup>2</sup>, Murray Weeks<sup>3</sup>, Ian Colman<sup>2,3</sup>

<sup>1</sup> Department of Epidemiology, Harvard School of Public Health, Boston, MA, USA

<sup>2</sup> School of Public Health, University of Alberta, Edmonton, AB, Canada

<sup>3</sup> Department of Epidemiology and Community Medicine, University of Ottawa, Ottawa, ON, Canada

Corresponding Author: Dr. Ian Colman, Assistant Professor, Department of Epidemiology and Community Medicine, University of Ottawa, 451 Smyth Road, Room 3230C, Ottawa, ON, K1H 8M5, CANADA

Email: [icolman@uottawa.ca](mailto:icolman@uottawa.ca) Tel: +1 613 562 5800 ext. 8715

Keywords: migraine, major depression, stress, trauma

## Abstract

**Objectives:** To assess how much the association between migraine and depression may be explained by various measures of stress.

**Design:** National Population Health Survey is a prospective cohort study representative of the Canadian population. Eight years of follow-up time were used in the present analyses.

**Setting:** Canadian adult population ages 18-64

**Participants:** 9,288 participants

**Outcome:** Incident migraine and major depression

**Results:** Adjusting for sex and age, depression was predictive of incident migraine (HR: 1.62; 95% CI: 1.03-2.53) and migraine was predictive of incident depression (HR: 1.55; 95% CI: 1.15-2.08). However, adjusting for each assessed stressor (childhood trauma, recent marital problems, recent unemployment, recent household financial problems, work stress, chronic stress, and change in social support) decreased this association, with chronic stress being a particularly strong predictor of outcomes. When adjusting for all stressors simultaneously, both associations were largely attenuated (depression-migraine HR: 1.30; 95% CI: 0.80-2.10; migraine-depression HR: 1.19; 95% CI: 0.86-1.66).

**Conclusions:** Much of the apparent association between migraine and depression may be explained by stress.

## ARTICLE SUMMARY

### Article Focus

- To understand how much and what kinds of stressors play a role in explaining the comorbidity seen between migraine and major depression

### Key Messages

- Migraine headache and major depression each predict the other prospectively
- Stress, particularly chronic stress, appears to explain much of the association seen between migraine and major depression

### Strengths and Limitations

- Large, representative, prospective cohort study
- Migraine was self-reported with only a single question

## INTRODUCTION

Several studies support that migraine and psychopathologies, in particular major depression, often co-occur.<sup>[1-15]</sup> In a recent review of such comorbidities, Antonaci et al reported a meta-analysis of 12 studies, concluding that the odds ratio may be near 2.2 for major depression and migraine.<sup>[16]</sup> A limited number of prospective studies have examined the temporality of this association, largely concluding the predictive relationship is bidirectional (i.e., migraine status predicts depression onset and vice versa).<sup>[1, 2, 10]</sup> While the correlation has been well established, the mechanisms for this co-occurrence are less clear; causal paths may exist from one disorder to the other, and/or some shared common risk factor(s) (i.e., confounders) may cause both depression and migraine.

Migraine and depression indeed share several risk factors, and thus any perceived correlation between the two could potentially be due to this confounding. Prior research assessing their association has adjusted primarily for demographic variables, however some studies have separately studied other risk factors of a genetic and neurobiologic nature. Few studies, however, have focused on stress, a known risk factor for both migraine and depression. In Modgill and colleagues' analyses of the National Population Health Survey (NPHS), a representative longitudinal study of the Canadian population, childhood trauma attenuated the association between the two disorders, particularly for the direction of depression predicting migraine onset.<sup>[10]</sup> However, their analyses only looked at a limited number of stressors and did not attempt to address specifically how much different types of stressors may contribute to this association. A variety of stressors may confound the migraine-depression association, as many types have been found to be

1  
2  
3 risk factors for both disorders: e.g., childhood trauma,<sup>[10, 17]</sup> unemployment,<sup>[18, 19]</sup>  
4  
5 chronic/repeated stress,<sup>[20, 21]</sup> etc.  
6  
7

8  
9 In the current study, we extend upon Modgill et al's findings in the NPHS to  
10  
11 assess how much the association between migraine and depression may be explained by  
12  
13 various measures of stress, including a wide variety of prior and current stressors. We  
14  
15 assess this association longitudinally and bidirectionally.  
16  
17  
18  
19  
20  
21  
22  
23  
24  
25  
26  
27  
28  
29  
30  
31  
32  
33  
34  
35  
36  
37  
38  
39  
40  
41  
42  
43  
44  
45  
46  
47  
48  
49  
50  
51  
52  
53  
54  
55  
56  
57  
58  
59  
60



## METHODS

### *Sample*

The NPHS is a prospective, nationally representative study conducted by Statistics Canada that has followed a Canadian cohort since 1994/95. At study inception, individuals were randomly selected using a stratified two-stage sample design (n=17,276). The sample has been contacted every two years, with the most recent data collection in 2008/09.

For the purposes of this study, we restricted our sample to individuals aged 18 to 64 years in Cycle 4 (2000/01), with this assessment treated as “baseline” in the presented analyses. This serves two purposes: (1) as both migraine and depression assessments reflect current states rather than diagnostic histories, this allows us to use the first three assessments to construct a several-year history of each disorder prior to baseline; and (2) as some of the stressors were not assessed until this time (e.g., work stress, chronic stress) or could not be constructed without at least two assessments (e.g., change in social support, marital status, or employment), this allows a more complete analysis of the role of stressors in the migraine-depression comorbidity. Further information on our analytic sample is depicted in Figure 1.

### *Depression*

Major depressive episodes are assessed using the Composite International Diagnostic Interview Short Form for Major Depression (CIDI-SFMD) at all eight cycles. The CIDI-SFMD inquires about symptoms of major depression, as defined by the

1  
2  
3 Diagnostic and Statistical Manual of Mental Disorders IV (DSM-IV), during the  
4  
5 preceding 12 months. Kessler and colleagues<sup>[22]</sup> showed that the CIDI-SF has 93%  
6  
7 classification accuracy for major depressive episode when compared with the full-length  
8  
9 CIDI. Individuals who endorse five or more symptoms during a single two-week period  
10  
11 are considered to have a 90% probability of having major depression,<sup>[22]</sup> for the purposes  
12  
13 of this study, such individuals will be considered as having major depression in that year.  
14  
15

### 16 17 18 *Migraine*

19  
20  
21 Migraine is assessed in a single diagnostic question at each assessment. In the first  
22  
23 three assessments (1994/95; 1996/97; 1998/99), subjects were asked whether they  
24  
25 currently were having migraine headaches that had been diagnosed by a health  
26  
27 professional. In the subsequent five assessments (2000/01; 2002/03; 2004/05; 2006/07;  
28  
29 2008/09), subjects were asked whether they currently have migraine headaches. In these  
30  
31 last five assessments, subjects were further asked about the timing of onset of the  
32  
33 diagnosis.  
34  
35

### 36 37 38 *Stressors*

39  
40  
41 Using similar definitions as previous studies using NPHS data,<sup>[17]</sup> we defined  
42  
43 several types of stressors: childhood trauma, recent marital problems, recent  
44  
45 unemployment, recent household financial problems, work stress, chronic stress, and  
46  
47 change in social support. Childhood trauma was assessed in Cycle 1 (1994/95) for those  
48  
49 18 or older at that time, and in Cycle 4 (2000/01) for the rest of our cohort. Subjects were  
50  
51 asked about seven items of childhood trauma occurring prior to the individual turning 18:  
52  
53 parental divorce, a lengthy hospital stay, prolonged parental unemployment, frequent  
54  
55 parental alcohol or drug use and physical abuse. Childhood trauma was categorized as  
56  
57  
58  
59  
60

1  
2  
3 none, one event, and two or more events. Three recent stressful life changes were  
4 defined: marital problems, recent unemployment, and household financial problems.  
5  
6 Marital problems were defined by a change from reporting single, married, or partnered  
7 in Cycle 3 (1998/99) to divorced, widowed, or separated in Cycle 4 (2000/01). Recent  
8 unemployment was defined as being employed in Cycle 3 (1998/99) but reporting  
9 unemployment or not being in the labor force in Cycle 4 (2000/01). Household financial  
10 problems were defined as having a score above Statistic Canada's low income cut-off  
11 (LICO) in Cycle 3 (1998/99) followed by a score below the cut-off in Cycle 4 (2000/01).  
12 The LICO score takes into account the individual's income relative to the community in  
13 which an individual lives and the size of their household.<sup>[23, 24]</sup> Work stress was measured  
14 in Cycle 4 (2000/01) by 13 questions that assessed job security, autonomy, conflict and  
15 satisfaction,<sup>[24]</sup> the score was categorized by quartiles. Chronic stress was measured in  
16 Cycle 4 (2000/01) by 18 questions that assessed stress in one's personal life, focusing  
17 primarily on relationships and family strife;<sup>[24]</sup> this score was also broken into quartiles.  
18 Social support was measured by a 4-question scale in Cycles 3 and 4 (1998/99;  
19 2000/01);<sup>[24]</sup> this score was dichotomized at the median, and change in social support was  
20 conceptualized as a change from high to low social support.  
21  
22  
23  
24  
25  
26  
27  
28  
29  
30  
31  
32  
33  
34  
35  
36  
37  
38  
39  
40  
41  
42  
43

#### 44 *Statistical Analyses*

45  
46 We performed two sets of analyses. First, among those with no history of major  
47 depression (unweighted n=7,818), we assessed the onset of incident major depression  
48 comparing those with and without migraine at baseline; second, among those with no  
49 history of migraine (unweighted n=7,765), we assessed the onset of incident migraine  
50 comparing those with and without major depression at baseline. Cox Proportional  
51  
52  
53  
54  
55  
56  
57  
58  
59  
60

1  
2  
3 Hazards Models were fit, and hazards ratios (HR) and their 95% confidence intervals (CI)  
4  
5 are presented. Models are presented as unadjusted; adjusting for sex and age; adjusting  
6  
7 for sex, age, and each stress exposure individually; and adjusting for sex, age, and all  
8  
9 stress exposures. Data analyses were completed using SAS 9.2 and SUDAAN 10.0.1. All  
10  
11 estimates were weighted to adjust for unequal selection probabilities and cluster  
12  
13 sampling; weights further adjust for attrition between the first and fourth cycle. Standard  
14  
15 errors were calculated using the bootstrap method.  
16  
17  
18  
19  
20  
21  
22  
23  
24  
25  
26  
27  
28  
29  
30  
31  
32  
33  
34  
35  
36  
37  
38  
39  
40  
41  
42  
43  
44  
45  
46  
47  
48  
49  
50  
51  
52  
53  
54  
55  
56  
57  
58  
59  
60

## RESULTS

Demographic information is presented in **Table 1**. At baseline, 4.13, 9.13, and 1.33% of the sample reported current depression only, migraine only, and comorbid depression and migraine, respectively.

Models for depression status predicting incident migraine are presented in **Table 2**. Among non-migraineurs in Cycle 4 (2000/01), 5.52% developed migraine during the eight-year follow-up. The sex- and age-adjusted model suggested depression was predictive of incident migraine (HR: 1.62; 95% CI: 1.03-2.53). When adjusting further for stressors in separate models, estimates were further attenuated; adjusting for chronic stress attenuated the estimate the most (HR: 1.34; 95% CI: 0.84-2.13). When adjusting for all forms of stressors simultaneously, the depression-migraine estimate was attenuated to a HR of 1.30 (95% CI: 0.80-2.10).

Models for migraine status predicting incident depression are presented in **Table 3**. Among subjects who had not had a depression up through Cycle 4 (2000/01), 8.72% developed incident depression. Migraine status was predictive of incident depression in the age- and sex-adjusted model (HR: 1.55; 95% CI: 1.15-2.08). Adjusting for stressors in separate models attenuated this relationship, with adjustment for chronic stress affecting the estimate the most (HR: 1.33; 95% CI: 0.98-1.79). The fully adjusted model estimate for the migraine-depression HR was attenuated to 1.19 (95% CI: 0.86-1.66).

## DISCUSSION

Without considering common causes or other explanations, these results align with earlier findings supporting a bidirectionality to a migraine-depression association: in crude analyses, migraine status predicted incident depression, and depression status predicted incident migraine. However, both directions of this relationship are largely explained by stressors that likely increase risk for both migraine and depression: adjusting for all measured forms of stress in these surveys attenuated the each estimate considerably (estimates decreased from 1.62 to 1.30, and 1.55 to 1.19) and the associations were no longer significant after adjustment. Implications for research as well as clinical and public health practice are discussed.

Importantly, all stressors studied here did attenuate the results, suggesting that any form of stress may be an important common cause to consider when studying migraine and depression. This finding follows from prior research that supports both acute and chronic forms of stress as being confounders, since these have been shown to predict depression and migraine.<sup>[10, 17-21]</sup> The present study suggests that prior studies that these stressors collectively explain much of the perceived migraine-depression association; research that does not account for these common causes when studying depression and migraine may be presenting misleading estimates. The perceived migraine-depression associations presented in many prior studies may be largely explained by unmeasured confounding by such types of stressors. The magnitude of confounding due to each specific stressor is dependent on several factors, including the strength of the covariate-exposure association, the strength of the covariate-outcome association, and the prevalence of the covariate. Our measure of chronic stress was strongly predictive of both

1  
2  
3 migraine and depression onset, as well as associated with these disorders at baseline, and  
4  
5 thus was the strongest risk factor considered in the present analyses. On the other hand,  
6  
7 recent changes in employment and marital status were relatively rare life events, and  
8  
9 were not strongly predictive of these disorders, so the magnitude of attenuation when  
10  
11 considering each of these variables was minor. Optimally, future studies of migraine and  
12  
13 depression would assess all potential confounders; as this is not always feasible,  
14  
15 investigators may consider prioritizing assessing chronic stress over some of these other  
16  
17 stressors, and accompany results with sensitivity or bias analyses for any stressors that  
18  
19 remained unmeasured.  
20  
21  
22  
23  
24

25 Our finding that chronic stress was the strongest stress-related risk factor fits into  
26  
27 the broader context of research suggesting that chronic stress may be causative of various  
28  
29 types of chronic pain and major depression. In disentangling the relationship between  
30  
31 depression, chronic stress, and chronic pain such as fibromyalgia, it has been proposed that  
32  
33 chronic stress may lead to dysfunction in the hypothalamic-pituitary-adrenal axis, which  
34  
35 in turn could lead to both depression and some forms of chronic pain.<sup>[25]</sup> Research  
36  
37 specific to stress and migraine supports this biological theory.<sup>[26]</sup> Notably, childhood  
38  
39 trauma was a strong risk factor in migraine predicting depression; as many of the types of  
40  
41 trauma assessed were chronic in nature, this aligns with the finding that perhaps chronic  
42  
43 forms of stress are especially potent common causes of migraine and depression.  
44  
45  
46  
47  
48

49 Although certainly some of the crude association between depression and  
50  
51 migraine may still be explained by genetics, other common causes, and/or biological  
52  
53 pathways between the two disorders, the current findings suggest interesting  
54  
55 considerations when developing future intervention strategies. Given the possibility of a  
56  
57  
58  
59  
60

1  
2  
3 biological mechanism between these two disorders, much research attention has been  
4  
5 focused on the efficacy of antidepressant medications on preventing and managing  
6  
7 migraine, with mixed success.<sup>[27-29]</sup> However, the current study suggests that perhaps a  
8  
9 primary strategy could target reducing stress, particularly chronic stress, as this may both  
10  
11 reduce the burden of the index disorder as well as potentially prevent the second  
12  
13 condition from occurring. Indeed, there have been studies showing that various  
14  
15 behavioural or stress management therapies (e.g., Cognitive-Behavioral Therapy) are  
16  
17 effective treatments for migraine, supporting one aspect of this hypothesis.<sup>[30-32]</sup> Given  
18  
19 how much chronic stress and other stressors seem to explain the comorbidity, such a  
20  
21 strategy may have the potential for reducing this comorbidity burden on a larger scale  
22  
23 than some of these other postulated pharmacological strategies, although further research  
24  
25 actually comparing such treatment strategies would be needed. Utilizing a stress-reducing  
26  
27 strategy to address this comorbidity assumes that stress is (directly or indirectly)  
28  
29 causative of both disorders, while it is possible that stress is a risk factor through  
30  
31 associations with a common cause.  
32  
33  
34  
35  
36  
37  
38

39  
40 The study has numerous strengths. This is one of only a few studies to  
41  
42 prospectively assess the migraine-depression comorbidity bidirectionally,<sup>[1, 2, 10]</sup> and  
43  
44 extends these previous findings by examining whether a rich assortment of widely-used  
45  
46 stress measures explained the associations found. The nationally-representative nature of  
47  
48 the study aids the generalizability of these findings, and the sample size and length of  
49  
50 follow-up are exceptional.  
51  
52

53  
54 However, certain limitations warrant consideration. Migraine was assessed as  
55  
56 only a single, self-reported question at each cycle. Self-reported symptom-based  
57  
58  
59  
60



1  
2  
3 assessments do generally report a higher prevalence than doctor diagnoses;<sup>[33]</sup> the  
4  
5 assessment in the NPHS inquires about diagnosis by a health professional which may  
6  
7 offset some of this over-reporting, but certainly misclassification may still be an issue.  
8  
9 Specifically, self-report may be further inflated in depressed individuals, which may  
10  
11 actually contribute to some overestimation in our associations. While the measure of  
12  
13 major depression (CIDI-SFMD) has demonstrated psychometric properties,<sup>[22, 34, 35]</sup> the  
14  
15 12-month diagnosis (which thus does not cover the 2 years between each study  
16  
17 assessment) hinders inference about history of major depression, possible episodes  
18  
19 unmeasured in the gap years of the study, and actual timing of onset of the disorder;  
20  
21 subjects who have less frequent depressive episodes or episodes that are shorter in  
22  
23 duration would be less likely to be measured accurately. However, by using an interim  
24  
25 cycle as “baseline”, we were able to construct over a half-decade profile of subjects’  
26  
27 “history” of major depression to diminish the issue regarding assessing history. Finally,  
28  
29 we did not have complete follow-up for all subjects. Weighting was used to correct for  
30  
31 attrition between Cycles 1 and 4. From Cycle 4 through 8 the majority of subjects were  
32  
33 assessed eight years later (see Figure 1), and follow-up duration was not associated with  
34  
35 migraine or depression status at baseline. Follow-up duration, however, was associated  
36  
37 with age and a few stressors (greater chronic stress, recent unemployment, and recent  
38  
39 divorce were associated with shorter follow-up;  $p$ 's<0.05); however, as stress likely  
40  
41 predicts higher levels of the outcome disorders, its likely this implies that some subjects  
42  
43 were censored prior to onset of the outcome, meaning that stress would explain even  
44  
45 more of the association measured had complete follow-up occurred.  
46  
47  
48  
49  
50  
51  
52  
53  
54  
55  
56  
57  
58  
59  
60

1  
2  
3  
4  
5  
6  
7  
8  
9  
10  
11  
12  
13  
14  
15  
16  
17  
18  
19  
20  
21  
22  
23  
24  
25  
26  
27  
28  
29  
30  
31  
32  
33  
34  
35  
36  
37  
38  
39  
40  
41  
42  
43  
44  
45  
46  
47  
48  
49  
50  
51  
52  
53  
54  
55  
56  
57  
58  
59  
60

These analyses highlight considerations for future research. These analyses represent a rich assortment of stressors, but several other stressors may also merit examination, e.g., childhood sexual abuse, acute recent traumas such as injury or illness, etc. Further, as some of the stressors were only assessed in one or two cycles, we were not able to fully address the time-varying nature of the relationships between stress and these episodic conditions. Given that we found recent and prior stress to be relevant in this comorbidity, future research may wish to more closely examine the time-varying relationship between stress and these two conditions individually and comorbidly. Specifically, while stress is a risk factor for both disorders, it may also be caused by each disorder, and thus assessing temporal relationships using models that account for time-varying confounding appropriately (e.g., marginal structural models), may highlight the relationship between these variables further.

Understanding the causal mechanisms underlying the migraine-depression comorbidity may have a major public health impact. Major depression is a chief cause of disability worldwide,<sup>[36]</sup> estimated by the World Health Organization to become the second leading cause of disease burden by the year 2020.<sup>[37]</sup> Meanwhile, migraine affects 11% of the adult population, and when combined with other headache disorders also makes it into the top ten causes of disability by World Health Organization estimates.<sup>[38]</sup> Moreover, studies suggest that the disability and burden of these disorders may be compounded when present together;<sup>[5]</sup> disease severity appears greater when these disorders are comorbid, e.g., frequency and duration of migraine attacks have a significant association with psychiatric comorbidity.<sup>[39]</sup> Migraine patients with a psychiatric disorder report generally lower quality of life than other migraine patients;<sup>[8]</sup>

1  
2  
3 in parallel, depression patients who report migraine also report poorer quality of life  
4  
5 compared to other depression patients.<sup>[40]</sup> As such, implementation of effective stress-  
6  
7 management strategies for migraineurs and those suffering from depression (as well as  
8  
9 similar strategies to prevent the index disorder onset) may have major implications for  
10  
11 prevention and intervention strategies that may lower the societal costs and burdens of  
12  
13 both disorders.  
14  
15  
16  
17  
18  
19  
20  
21  
22  
23  
24  
25  
26  
27  
28  
29  
30  
31  
32  
33  
34  
35  
36  
37  
38  
39  
40  
41  
42  
43  
44  
45  
46  
47  
48  
49  
50  
51  
52  
53  
54  
55  
56  
57  
58  
59  
60

## REFERENCES

1. Breslau N, Lipton RB, Stewart WF, Schultz LR, Welch KM. Comorbidity of migraine and depression: investigating potential etiology and prognosis. *Neurology*. 2003 Apr 22;60(8):1308-12.
2. Breslau N, Schultz LR, Stewart WF, Lipton RB, Lucia VC, Welch KM. Headache and major depression: is the association specific to migraine? *Neurology*. 2000 Jan 25;54(2):308-13.
3. Camarda C, Pipia C, Tagliavori A, Di Fiore P, Camarda R, Monastero R. Comorbidity between depressive symptoms and migraine: preliminary data from the Zabut Aging Project. *Neurol Sci*. 2008 May;29 Suppl 1:S149-51.
4. Hung CI, Liu CY, Cheng YT, Wang SJ. Migraine: a missing link between somatic symptoms and major depressive disorder. *J Affect Disord*. 2009 Sep;117(1-2):108-15.
5. Jette N, Patten S, Williams J, Becker W, Wiebe S. Comorbidity of migraine and psychiatric disorders--a national population-based study. *Headache*. 2008 Apr;48(4):501-16.
6. Kececi H, Dener S, Analan E. Co-morbidity of migraine and major depression in the Turkish population. *Cephalalgia*. 2003 May;23(4):271-5.
7. Lanteri-Minet M, Valade D, Geraud G, Chautard MH, Lucas C. Migraine and probable migraine--results of FRAMIG 3, a French nationwide survey carried out according to the 2004 IHS classification. *Cephalalgia*. 2005 Dec;25(12):1146-58.
8. Lipton RB, Hamelsky SW, Kolodner KB, Steiner TJ, Stewart WF. Migraine, quality of life, and depression: a population-based case-control study. *Neurology*. 2000 Sep 12;55(5):629-35.
9. McWilliams LA, Goodwin RD, Cox BJ. Depression and anxiety associated with three pain conditions: results from a nationally representative sample. *Pain*. 2004 Sep;111(1-2):77-83.
10. Modgill G, Jette N, Wang JL, Becker WJ, Patten SB. A population-based longitudinal community study of major depression and migraine. *Headache*. [Research Support, Non-U.S. Gov't]. 2012 Mar;52(3):422-32.
11. Molgat CV, Patten SB. Comorbidity of major depression and migraine--a Canadian population-based study. *Can J Psychiatry*. [Research Support, Non-U.S. Gov't]. 2005 Nov;50(13):832-7.
12. Ratcliffe GE, Enns MW, Jacobi F, Belik SL, Sareen J. The relationship between migraine and mental disorders in a population-based sample. *Gen Hosp Psychiatry*. 2009 Jan-Feb;31(1):14-9.
13. Rhee H. Prevalence and predictors of headaches in US adolescents. *Headache*. 2000 Jul-Aug;40(7):528-38.
14. Samaan Z, Farmer A, Craddock N, Jones L, Korszun A, Owen M, et al. Migraine in recurrent depression: case-control study. *Br J Psychiatry*. 2009 Apr;194(4):350-4.
15. Wang SJ, Liu HC, Fuh JL, Liu CY, Wang PN, Lu SR. Comorbidity of headaches and depression in the elderly. *Pain*. 1999 Sep;82(3):239-43.
16. Antonaci F, Nappi G, Galli F, Manzoni GC, Calabresi P, Costa A. Migraine and psychiatric comorbidity: a review of clinical findings. *J Headache Pain*. Jan 6.

- 1  
2  
3  
4  
5  
6  
7  
8  
9  
10  
11  
12  
13  
14  
15  
16  
17  
18  
19  
20  
21  
22  
23  
24  
25  
26  
27  
28  
29  
30  
31  
32  
33  
34  
35  
36  
37  
38  
39  
40  
41  
42  
43  
44  
45  
46  
47  
48  
49  
50  
51  
52  
53  
54  
55  
56  
57  
58  
59  
60
17. Colman I, Garad Y, Zeng Y, Naicker K, Weeks M, Patten SB, et al. Stress and development of depression and heavy drinking in adulthood: moderating effects of childhood trauma. *Soc Psychiatry Psychiatr Epidemiol*. 2012 Jun 9.
18. Le H, Tfelt-Hansen P, Skytthe A, Kyvik KO, Olesen J. Association between migraine, lifestyle and socioeconomic factors: a population-based cross-sectional study. *The journal of headache and pain*. [Twin Study]. 2011 Apr;12(2):157-72.
19. Gili M, Roca M, Basu S, McKee M, Stuckler D. The mental health risks of economic crisis in Spain: evidence from primary care centres, 2006 and 2010. *Eur J Public Health*. 2012 Apr 19.
20. Maleki N, Becerra L, Borsook D. Migraine: maladaptive brain responses to stress. *Headache*. 2012 Oct;52 Suppl 2:102-6.
21. Risch N, Herrell R, Lehner T, Liang KY, Eaves L, Hoh J, et al. Interaction between the serotonin transporter gene (5-HTTLPR), stressful life events, and risk of depression: a meta-analysis. *Jama*. [Meta-Analysis
- Research Support, N.I.H., Extramural
- Research Support, N.I.H., Intramural]. 2009 Jun 17;301(23):2462-71.
22. Kessler RC, Andrews G, Mroczek DK, Ustun B, Wittchen HU. The World Health Organization Composite International Diagnostic Interview short-form (CIDI-SF). *Int J Methods Psychiatr Res*. 1998;7(5):171-85.
23. Cotton C. Recent developments in the low income cut offs. Ottawa: Statistics Canada; 2001.
24. Statistics Canada. National Population Health Survey Cycle 1 (1994-1995). Public use microdata files documentation. Ottawa 1995.
25. Blackburn-Munro G. Hypothalamo-pituitary-adrenal axis dysfunction as a contributory factor to chronic pain and depression. *Curr Pain Headache Rep*. [Review]. 2004 Apr;8(2):116-24.
26. Sauro KM, Becker WJ. The stress and migraine interaction. *Headache*. [Review]. 2009 Oct;49(9):1378-86.
27. Adelman LC, Adelman JU, Von Seggern R, Mannix LK. Venlafaxine extended release (XR) for the prophylaxis of migraine and tension-type headache: A retrospective study in a clinical setting. *Headache*. [Clinical Trial
- Research Support, Non-U.S. Gov't]. 2000 Jul-Aug;40(7):572-80.
28. Sheftell FD, Atlas SJ. Migraine and psychiatric comorbidity: from theory and hypotheses to clinical application. *Headache*. 2002 Oct;42(9):934-44.
29. Silberstein SD, Goadsby PJ. Migraine: preventive treatment. *Cephalalgia : an international journal of headache*. [Review]. 2002 Sep;22(7):491-512.
30. Martin PR, Forsyth MR, Reece J. Cognitive-behavioral therapy versus temporal pulse amplitude biofeedback training for recurrent headache. *Behav Ther*. [Randomized Controlled Trial]. 2007 Dec;38(4):350-63.
31. Penzien DB. Stress management for migraine: recent research and commentary. *Headache*. [Review]. 2009 Oct;49(9):1395-8.
32. Rains JC, Penzien DB, McCrory DC, Gray RN. Behavioral headache treatment: history, review of the empirical literature, and methodological critique. *Headache*. [Review]. 2005 May;45 Suppl 2:S92-109.

- 1  
2  
3  
4  
5  
6  
7  
8  
9  
10  
11  
12  
13  
14  
15  
16  
17  
18  
19  
20  
21  
22  
23  
24  
25  
26  
27  
28  
29  
30  
31  
32  
33  
34  
35  
36  
37  
38  
39  
40  
41  
42  
43  
44  
45  
46  
47  
48  
49  
50  
51  
52  
53  
54  
55  
56  
57  
58  
59  
60
33. Cousins G, Hijazze S, Van de Laar FA, Fahey T. Diagnostic accuracy of the ID Migraine: a systematic review and meta-analysis. *Headache*. [Meta-Analysis Research Support, Non-U.S. Gov't Review]. 2011 Jul-Aug;51(7):1140-8.
34. Patten SB. Performance of the Composite International Diagnostic Interview Short Form for major depression in community and clinical samples. *Chronic Dis Can*. [Comparative Study]. 1997;18(3):109-12.
35. Patten SB, Brandon-Christie J, Devji J, Sedmak B. Performance of the composite international diagnostic interview short form for major depression in a community sample. *Chronic Dis Can*. 2000;21(2):68-72.
36. Ustun TB, Kessler RC. Global burden of depressive disorders: the issue of duration. *Br J Psychiatry*. 2002 Sep;181:181-3.
37. Simon GE. Social and economic burden of mood disorders. *Biol Psychiatry*. 2003 Aug 1;54(3):208-15.
38. Stovner L, Hagen K, Jensen R, Katsarava Z, Lipton R, Scher A, et al. The global burden of headache: a documentation of headache prevalence and disability worldwide. *Cephalalgia*. 2007 Mar;27(3):193-210.
39. Mitsikostas DD, Thomas AM. Comorbidity of headache and depressive disorders. *Cephalalgia*. 1999 May;19(4):211-7.
40. Hung CI, Wang SJ, Hsu KH, Juang YY, Liu CY. Risk factors associated with migraine or chronic daily headache in out-patients with major depressive disorder. *Acta Psychiatr Scand*. 2005 Apr;111(4):310-5.

## ACKNOWLEDGMENTS

The authors would like to thank Ms. Irene Wong of Statistics Canada for her assistance with data access and use. The research and analysis are based on data from Statistics Canada and the opinions expressed do not represent the views of Statistics Canada.

## FUNDING

This research was undertaken, in part, thanks to funding from the Canada Research Chairs program for Dr. Colman. Funders had no role in study design, data collection and analysis, decision to publish, or preparation of the manuscript.

## COMPETING INTERESTS

None declared

## AUTHOR CONTRIBUTIONS

SS and IC conceived and designed the study and interpreted the results. SS, YZ and MW performed the data analysis. SS wrote the manuscript. All authors critically reviewed the manuscript.

1  
2  
3  
4  
5  
6  
7  
8  
9  
10  
11  
12  
13  
14  
15  
16  
17  
18  
19  
20  
21  
22  
23  
24  
25  
26  
27  
28  
29  
30  
31  
32  
33  
34  
35  
36  
37  
38  
39  
40  
41  
42  
43  
44  
45  
46  
47  
48  
49

Table 1. Sample Characteristics Ages 18-64, % (SE)

| Variable                                                        | Unweighted N | % (SE)        |
|-----------------------------------------------------------------|--------------|---------------|
| <b>N</b>                                                        | 9,342        |               |
| <b>Sex</b>                                                      |              |               |
| Male                                                            | 4,986        | 50.31 (0.17)  |
| Female                                                          | 4,356        | 49.69 (0.17)  |
| <b>Age, mean (range)</b>                                        |              | 40.77 (18-64) |
| <b>Baseline Migraine/Depression Comorbidity</b>                 |              |               |
| None                                                            | 7,619        | 85.41 (0.49)  |
| Depression Only                                                 | 404          | 4.13 (0.29)   |
| Migraine Only                                                   | 839          | 9.13 (0.40)   |
| Depression and Migraine                                         | 124          | 1.33 (0.17)   |
| <b>Childhood Trauma</b>                                         |              |               |
| 0                                                               | 4,194        | 49.61 (0.74)  |
| 1                                                               | 2,265        | 25.82 (0.64)  |
| 2+                                                              | 2,274        | 24.57 (0.65)  |
| <b>Recent Marital Change to Divorced, Separated, or Widowed</b> |              |               |
| Yes                                                             | 214          | 2.47 (0.23)   |
| No                                                              | 8,781        | 97.53 (0.23)  |
| <b>Recent Unemployment</b>                                      |              |               |
| Yes                                                             | 394          | 4.34 (0.32)   |
| No                                                              | 8,670        | 95.66 (0.32)  |
| <b>Recent Change in Social Support</b>                          |              |               |
| Yes                                                             | 1,359        | 16.76 (0.60)  |
| No                                                              | 6,961        | 83.24 (0.60)  |
| <b>Years of Follow-Up</b>                                       |              |               |
| Median                                                          |              | 7.30          |
| IQR                                                             |              | 6.29-7.67     |

For peer review only



Table 2. Adjusted hazard ratios for depression predicting migraine, adjusting for various stressors, age, and sex

|                                     | Model 1<br>(n=7,076) | Model 2<br>(n=7,076) | Model 3<br>(n=6,678) | Model 4<br>(n=6,868) | Model 5<br>(n=6,953) | Model 6<br>(n=7,064) | Model 7<br>(n=7,044) | Model 8<br>(n=7,076) | Model 9<br>(n=6,339) |
|-------------------------------------|----------------------|----------------------|----------------------|----------------------|----------------------|----------------------|----------------------|----------------------|----------------------|
| <b>Depression</b>                   |                      |                      |                      |                      |                      |                      |                      |                      |                      |
| Yes                                 | 1.85 (1.20-2.85)     | 1.62 (1.03-2.53)     | 1.59 (1.03-2.46)     | 1.56 (0.98-2.47)     | 1.61 (1.02-2.53)     | 1.52 (0.97-2.38)     | 1.34 (0.84-2.13)     | 1.61 (1.02-2.54)     | 1.30 (0.80-2.10)     |
| No                                  | Reference            |
| <b>Childhood Trauma</b>             |                      |                      |                      |                      |                      |                      |                      |                      |                      |
| None                                |                      |                      | Reference            |                      |                      |                      |                      |                      | Reference            |
| 1                                   |                      |                      | 0.95 (0.66-1.37)     |                      |                      |                      |                      |                      | 0.90 (0.60-1.33)     |
| 2+                                  |                      |                      | 1.34 (1.00-1.79)     |                      |                      |                      |                      |                      | 1.09 (0.79-1.51)     |
| <b>Recent Marital Status Change</b> |                      |                      |                      |                      |                      |                      |                      |                      |                      |
| Yes                                 |                      |                      |                      | 1.54 (0.82-2.90)     |                      |                      |                      |                      | 1.28 (0.59-2.75)     |
| No                                  |                      |                      |                      | Reference            |                      |                      |                      |                      | Reference            |
| <b>Recent Unemployment</b>          |                      |                      |                      |                      |                      |                      |                      |                      |                      |
| Yes                                 |                      |                      |                      |                      | 1.00 (0.44-2.30)     |                      |                      |                      | 0.72 (0.29-1.78)     |
| No                                  |                      |                      |                      |                      | Reference            |                      |                      |                      | Reference            |
| <b>Work Stress</b>                  |                      |                      |                      |                      |                      |                      |                      |                      |                      |
| 1 <sup>st</sup> Quartile            |                      |                      |                      |                      |                      | Reference            |                      |                      | Reference            |
| 2 <sup>nd</sup> Quartile            |                      |                      |                      |                      |                      | 0.63 (0.42-0.95)     |                      |                      | 0.61 (0.39-0.95)     |
| 3 <sup>rd</sup> Quartile            |                      |                      |                      |                      |                      | 0.66 (0.45-0.96)     |                      |                      | 0.63 (0.41-0.96)     |
| 4 <sup>th</sup> Quartile            |                      |                      |                      |                      |                      | 0.89 (0.61-1.31)     |                      |                      | 0.81 (0.52-1.27)     |
| <b>Chronic Stress</b>               |                      |                      |                      |                      |                      |                      |                      |                      |                      |
| 1 <sup>st</sup> Quartile            |                      |                      |                      |                      |                      |                      | Reference            |                      | Reference            |
| 2 <sup>nd</sup> Quartile            |                      |                      |                      |                      |                      |                      | 0.91 (0.59-1.40)     |                      | 0.99 (0.63-1.56)     |
| 3 <sup>rd</sup> Quartile            |                      |                      |                      |                      |                      |                      | 1.58 (1.11-2.25)     |                      | 1.64 (1.12-2.41)     |
| 4 <sup>th</sup> Quartile            |                      |                      |                      |                      |                      |                      | 1.76 (1.22-2.53)     |                      | 1.68 (1.08-2.61)     |
| <b>Change in Social Support</b>     |                      |                      |                      |                      |                      |                      |                      |                      |                      |
| Yes                                 |                      |                      |                      |                      |                      |                      |                      | 0.77 (0.54-1.11)     | 0.84 (0.58-1.21)     |
| No                                  |                      |                      |                      |                      |                      |                      |                      | Reference            | Reference            |
| <b>Sex</b>                          |                      |                      |                      |                      |                      |                      |                      |                      |                      |
| Male                                |                      | Reference            |
| Female                              |                      | 2.39 (1.83-3.12)     | 2.34 (1.79-3.08)     | 2.49 (1.90-3.26)     | 2.44 (1.86-3.20)     | 2.28 (1.73-2.99)     | 2.39 (1.83-3.12)     | 2.48 (1.89-3.25)     | 2.32 (1.73-3.11)     |
| <b>Age (continuous)</b>             |                      |                      |                      |                      |                      |                      |                      |                      |                      |
|                                     |                      | 0.98 (0.97-0.99)     | 0.98 (0.97-0.99)     | 0.98 (0.97-0.99)     | 0.98 (0.97-0.99)     | 0.98 (0.97-0.99)     | 0.98 (0.97-0.99)     | 0.98 (0.97-0.99)     | 0.98 (0.97-0.99)     |

Table 3. Adjusted hazard ratios for migraine predicting depression, adjusting for various stressors, age, and sex

|                                 | Model 1<br>(n=7,339) | Model 2<br>(n=7,339) | Model 3<br>(n=6,840) | Model 4<br>(n=7,121) | Model 5<br>(n=7,176) | Model 6<br>(n=7,144) | Model 7<br>(n=7,127) | Model 8<br>(n=7,339) | Model 9<br>(n=6,387) |
|---------------------------------|----------------------|----------------------|----------------------|----------------------|----------------------|----------------------|----------------------|----------------------|----------------------|
| <b>Migraine</b>                 |                      |                      |                      |                      |                      |                      |                      |                      |                      |
| Yes                             | 1.84 (1.38-2.45)     | 1.55 (1.15-2.08)     | 1.43 (1.06-1.92)     | 1.46 (1.08-1.98)     | 1.54 (1.14-2.08)     | 1.51 (1.11-2.05)     | 1.33 (0.98-1.79)     | 1.46 (1.07-1.99)     | 1.19 (0.86-1.66)     |
| No                              | Reference            |
| <b>Childhood Trauma</b>         |                      |                      |                      |                      |                      |                      |                      |                      |                      |
| None                            |                      |                      | Reference            |                      |                      |                      |                      |                      | Reference            |
| 1                               |                      |                      | 1.23 (0.92-1.64)     |                      |                      |                      |                      |                      | 1.14 (0.84-1.55)     |
| 2+                              |                      |                      | 2.36 (1.79-3.12)     |                      |                      |                      |                      |                      | 1.89 (1.38-2.59)     |
| <b>Recent Marital Status</b>    |                      |                      |                      |                      |                      |                      |                      |                      |                      |
| <b>Change</b>                   |                      |                      |                      |                      |                      |                      |                      |                      |                      |
| Yes                             |                      |                      |                      | 0.91 (0.40-2.06)     |                      |                      |                      |                      | 0.78 (0.33-1.84)     |
| No                              |                      |                      |                      | Reference            |                      |                      |                      |                      | Reference            |
| <b>Recent Unemployed</b>        |                      |                      |                      |                      |                      |                      |                      |                      |                      |
| Yes                             |                      |                      |                      |                      | 1.52 (0.93-2.49)     |                      |                      |                      | 1.16 (0.68-1.99)     |
| No                              |                      |                      |                      |                      | Reference            |                      |                      |                      | Reference            |
| <b>Work Stress</b>              |                      |                      |                      |                      |                      |                      |                      |                      |                      |
| 1 <sup>st</sup> Quartile        |                      |                      |                      |                      |                      | Reference            |                      |                      | Reference            |
| 2 <sup>nd</sup> Quartile        |                      |                      |                      |                      |                      | 0.64 (0.48-0.85)     |                      |                      | 0.70 (0.52-0.95)     |
| 3 <sup>rd</sup> Quartile        |                      |                      |                      |                      |                      | 0.69 (0.50-0.94)     |                      |                      | 0.76 (0.55-1.06)     |
| 4 <sup>th</sup> Quartile        |                      |                      |                      |                      |                      | 1.12 (0.84-1.51)     |                      |                      | 1.06 (0.77-1.48)     |
| <b>Chronic Stress</b>           |                      |                      |                      |                      |                      |                      |                      |                      |                      |
| 1 <sup>st</sup> Quartile        |                      |                      |                      |                      |                      |                      | Reference            |                      | Reference            |
| 2 <sup>nd</sup> Quartile        |                      |                      |                      |                      |                      |                      | 1.45 (1.06-2.00)     |                      | 1.47 (1.03-2.08)     |
| 3 <sup>rd</sup> Quartile        |                      |                      |                      |                      |                      |                      | 2.02 (1.50-2.73)     |                      | 1.89 (1.37-2.62)     |
| 4 <sup>th</sup> Quartile        |                      |                      |                      |                      |                      |                      | 2.93 (2.20-3.88)     |                      | 2.49 (1.80-3.44)     |
| <b>Change in Social Support</b> |                      |                      |                      |                      |                      |                      |                      |                      |                      |
| Yes                             |                      |                      |                      |                      |                      |                      |                      | 0.91 (0.69-1.20)     | 0.94 (0.71-1.23)     |
| No                              |                      |                      |                      |                      |                      |                      |                      | Reference            | Reference            |
| <b>Sex</b>                      |                      |                      |                      |                      |                      |                      |                      |                      |                      |
| Male                            |                      | Reference            |
| Female                          |                      | 1.91 (1.52-2.39)     | 1.86 (1.49-2.34)     | 1.94 (1.55-2.44)     | 1.92 (1.53-2.41)     | 1.80 (1.43-2.27)     | 1.89 (1.50-2.37)     | 1.89 (1.50-2.39)     | 1.83 (1.43-2.34)     |
| <b>Age (continuous)</b>         |                      |                      |                      |                      |                      |                      |                      |                      |                      |
|                                 |                      | 0.98 (0.97-0.99)     | 0.98 (0.97-0.99)     | 0.98 (0.97-0.99)     | 0.98 (0.97-0.99)     | 0.98 (0.97-0.99)     | 0.98 (0.97-0.99)     | 0.98 (0.97-0.99)     | 0.98 (0.97-0.99)     |
